# Supplementary material for: Malaria Vaccine Impact on Cases, Drug-resistant Cases, and Deaths in Africa: A Modeling Study
Source: Research Square preprint supplement (doi:10.21203/rs.3.rs-2362054/v1), 2022-12-19
Supplement: Supplementary file 1 [file 16ae698e8b3812bfc7d9ddbe.xlsx]

## Sheet: Malaria_Data
country	malaria_prev	malaria_prev_min	malaria_prev_max	1_4prop_est	5_9prop_est	pop_total	pop_atrisk	at_risk	trr	tfr	CFR_malaria	year	1	Pop1_4	Pop5_9	VE1	VE2	VE3	tfr_increasing	Pop1
Angola	8268572	5484000	11960000	0.164098	0.200291	32866268	32866268	1	0.181	0.03725	0.002885	2020	1185.59	4.67595e+06	5239058			0.4		1185.59
Angola	8268572	5484000	11960000	0.164098	0.200291	32866268	32866268	1	0.181	0.03725	0.002885	2021	1208.52	4.67595e+06	5239058	0.4	0.8	0.4	0.03725	1208.52
Angola	8268572	5484000	11960000	0.164098	0.200291	32866268	32866268	1	0.181	0.03725	0.002885	2022	1244.32	4.67595e+06	5239058	0.4	0.6	0.4	0.122	1244.32
Angola	8268572	5484000	11960000	0.164098	0.200291	32866268	32866268	1	0.181	0.03725	0.002885	2023	1276.33	4.67595e+06	5239058	0.4	0.4	0.4	0.20675	1276.33
Angola	8268572	5484000	11960000	0.164098	0.200291	32866268	32866268	1	0.181	0.03725	0.002885	2024	1309.37	4.67595e+06	5239058	0.4	0.2	0.4	0.2915	1309.37
Angola	8268572	5484000	11960000	0.164098	0.200291	32866268	32866268	1	0.181	0.03725	0.002885	2025	1342.85	4.67595e+06	5239058	0	0	0.4	0.37625	1342.85
Angola	8268572	5484000	11960000	0.164098	0.200291	32866268	32866268	1	0.181	0.03725	0.002885	2026	1381.84	4.67595e+06	5239058	0	0	0.4	0.461	1381.84
Angola	8268572	5484000	11960000	0.164098	0.200291	32866268	32866268	1	0.181	0.03725	0.002885	2027	1409.37	4.67595e+06	5239058	0	0	0.4	0.54575	1409.37
Angola	8268572	5484000	11960000	0.164098	0.200291	32866268	32866268	1	0.181	0.03725	0.002885	2028	1443.39	4.67595e+06	5239058	0	0	0.4	0.6305	1443.39
Angola	8268572	5484000	11960000	0.164098	0.200291	32866268	32866268	1	0.181	0.03725	0.002885	2029	1477.76	4.67595e+06	5239058	0	0	0.4	0.71525	1477.76
Angola	8268572	5484000	11960000	0.164098	0.200291	32866268	32866268	1	0.181	0.03725	0.002885	2030	1512.45	4.67595e+06	5239058	0	0	0.4	0.8	1512.45
Benin	4707522	3326000	6488000	0.16819	0.190356	12123198	12123198	1	0.175	0.0111667	0.00256	2020	390.883	1536594	1.72569e+06			0.4		390.883
Benin	4707522	3326000	6488000	0.16819	0.190356	12123198	12123198	1	0.175	0.0111667	0.00256	2021	398.16	1536594	1.72569e+06	0.4	0.8	0.4	0.0111667	398.16
Benin	4707522	3326000	6488000	0.16819	0.190356	12123198	12123198	1	0.175	0.0111667	0.00256	2022	405.321	1536594	1.72569e+06	0.4	0.6	0.4	0.0988148	405.321
Benin	4707522	3326000	6488000	0.16819	0.190356	12123198	12123198	1	0.175	0.0111667	0.00256	2023	412.865	1536594	1.72569e+06	0.4	0.4	0.4	0.186463	412.865
Benin	4707522	3326000	6488000	0.16819	0.190356	12123198	12123198	1	0.175	0.0111667	0.00256	2024	420.513	1536594	1.72569e+06	0.4	0.2	0.4	0.274111	420.513
Benin	4707522	3326000	6488000	0.16819	0.190356	12123198	12123198	1	0.175	0.0111667	0.00256	2025	428.181	1536594	1.72569e+06	0	0	0.4	0.361759	428.181
Benin	4707522	3326000	6488000	0.16819	0.190356	12123198	12123198	1	0.175	0.0111667	0.00256	2026	436.981	1536594	1.72569e+06	0	0	0.4	0.449407	436.981
Benin	4707522	3326000	6488000	0.16819	0.190356	12123198	12123198	1	0.175	0.0111667	0.00256	2027	443.089	1536594	1.72569e+06	0	0	0.4	0.537056	443.089
Benin	4707522	3326000	6488000	0.16819	0.190356	12123198	12123198	1	0.175	0.0111667	0.00256	2028	450.599	1536594	1.72569e+06	0	0	0.4	0.624704	450.599
Benin	4707522	3326000	6488000	0.16819	0.190356	12123198	12123198	1	0.175	0.0111667	0.00256	2029	458.112	1536594	1.72569e+06	0	0	0.4	0.712352	458.112
Benin	4707522	3326000	6488000	0.16819	0.190356	12123198	12123198	1	0.175	0.0111667	0.00256	2030	465.609	1536594	1.72569e+06	0	0	0.4	0.8	465.609
Botswana	1759	1200	2700	0.0822622	0.126983	2351625	1559080	0.66298	0.122276	0.0124814	0.00256	2020	54.151	217126	270051			0.4		35.901
Botswana	1759	1200	2700	0.0822622	0.126983	2351625	1559080	0.66298	0.122276	0.0124814	0.00256	2021	53.573	217126	270051	0.4	0.8	0.4	0.0124814	35.5178
Botswana	1759	1200	2700	0.0822622	0.126983	2351625	1559080	0.66298	0.122276	0.0124814	0.00256	2022	53.66	217126	270051	0.4	0.6	0.4	0.0999835	35.5755
Botswana	1759	1200	2700	0.0822622	0.126983	2351625	1559080	0.66298	0.122276	0.0124814	0.00256	2023	53.365	217126	270051	0.4	0.4	0.4	0.187486	35.3799
Botswana	1759	1200	2700	0.0822622	0.126983	2351625	1559080	0.66298	0.122276	0.0124814	0.00256	2024	53.124	217126	270051	0.4	0.2	0.4	0.274988	35.2201
Botswana	1759	1200	2700	0.0822622	0.126983	2351625	1559080	0.66298	0.122276	0.0124814	0.00256	2025	52.978	217126	270051	0	0	0.4	0.36249	35.1233
Botswana	1759	1200	2700	0.0822622	0.126983	2351625	1559080	0.66298	0.122276	0.0124814	0.00256	2026	52.755	217126	270051	0	0	0.4	0.449992	34.9755
Botswana	1759	1200	2700	0.0822622	0.126983	2351625	1559080	0.66298	0.122276	0.0124814	0.00256	2027	53.09	217126	270051	0	0	0.4	0.537494	35.1976
Botswana	1759	1200	2700	0.0822622	0.126983	2351625	1559080	0.66298	0.122276	0.0124814	0.00256	2028	53.257	217126	270051	0	0	0.4	0.624996	35.3083
Botswana	1759	1200	2700	0.0822622	0.126983	2351625	1559080	0.66298	0.122276	0.0124814	0.00256	2029	53.453	217126	270051	0	0	0.4	0.712498	35.4383
Botswana	1759	1200	2700	0.0822622	0.126983	2351625	1559080	0.66298	0.122276	0.0124814	0.00256	2030	53.647	217126	270051	0	0	0.4	0.8	35.5669
Burkina Faso	8150690	5042000	12410000	0.169672	0.190107	20903278	20903278	1	0.511	0.0878235	0.00351448	2020	711.535	2.79818e+06	3144301			0.4		711.535
Burkina Faso	8150690	5042000	12410000	0.169672	0.190107	20903278	20903278	1	0.511	0.0878235	0.00351448	2021	726.217	2.79818e+06	3144301	0.4	0.8	0.4	0.0878235	726.217
Burkina Faso	8150690	5042000	12410000	0.169672	0.190107	20903278	20903278	1	0.511	0.0878235	0.00351448	2022	737.073	2.79818e+06	3144301	0.4	0.6	0.4	0.166954	737.073
Burkina Faso	8150690	5042000	12410000	0.169672	0.190107	20903278	20903278	1	0.511	0.0878235	0.00351448	2023	750.233	2.79818e+06	3144301	0.4	0.4	0.4	0.246085	750.233
Burkina Faso	8150690	5042000	12410000	0.169672	0.190107	20903278	20903278	1	0.511	0.0878235	0.00351448	2024	763.754	2.79818e+06	3144301	0.4	0.2	0.4	0.325216	763.754
Burkina Faso	8150690	5042000	12410000	0.169672	0.190107	20903278	20903278	1	0.511	0.0878235	0.00351448	2025	777.686	2.79818e+06	3144301	0	0	0.4	0.404346	777.686
Burkina Faso	8150690	5042000	12410000	0.169672	0.190107	20903278	20903278	1	0.511	0.0878235	0.00351448	2026	793.164	2.79818e+06	3144301	0	0	0.4	0.483477	793.164
Burkina Faso	8150690	5042000	12410000	0.169672	0.190107	20903278	20903278	1	0.511	0.0878235	0.00351448	2027	806.119	2.79818e+06	3144301	0	0	0.4	0.562608	806.119
Burkina Faso	8150690	5042000	12410000	0.169672	0.190107	20903278	20903278	1	0.511	0.0878235	0.00351448	2028	820.796	2.79818e+06	3144301	0	0	0.4	0.641739	820.796
Burkina Faso	8150690	5042000	12410000	0.169672	0.190107	20903278	20903278	1	0.511	0.0878235	0.00351448	2029	835.501	2.79818e+06	3144301	0	0	0.4	0.720869	835.501
Burkina Faso	8150690	5042000	12410000	0.169672	0.190107	20903278	20903278	1	0.511	0.0878235	0.00351448	2030	850.055	2.79818e+06	3144301	0	0	0.4	0.8	850.055
Burundi	3506219	2131000	5442000	0.167289	0.18797	11890781	11890781	1	0.47	0.0646	0.00256	2020	418.226	1.65275e+06	1869306			0.4		418.226
Burundi	3506219	2131000	5442000	0.167289	0.18797	11890781	11890781	1	0.47	0.0646	0.00256	2021	422.319	1.65275e+06	1869306	0.4	0.8	0.4	0.0646	422.319
Burundi	3506219	2131000	5442000	0.167289	0.18797	11890781	11890781	1	0.47	0.0646	0.00256	2022	432.493	1.65275e+06	1869306	0.4	0.6	0.4	0.146311	432.493
Burundi	3506219	2131000	5442000	0.167289	0.18797	11890781	11890781	1	0.47	0.0646	0.00256	2023	439.786	1.65275e+06	1869306	0.4	0.4	0.4	0.228022	439.786
Burundi	3506219	2131000	5442000	0.167289	0.18797	11890781	11890781	1	0.47	0.0646	0.00256	2024	447.031	1.65275e+06	1869306	0.4	0.2	0.4	0.309733	447.031
Burundi	3506219	2131000	5442000	0.167289	0.18797	11890781	11890781	1	0.47	0.0646	0.00256	2025	454.088	1.65275e+06	1869306	0	0	0.4	0.391444	454.088
Burundi	3506219	2131000	5442000	0.167289	0.18797	11890781	11890781	1	0.47	0.0646	0.00256	2026	461.821	1.65275e+06	1869306	0	0	0.4	0.473156	461.821
Burundi	3506219	2131000	5442000	0.167289	0.18797	11890781	11890781	1	0.47	0.0646	0.00256	2027	467.215	1.65275e+06	1869306	0	0	0.4	0.554867	467.215
Burundi	3506219	2131000	5442000	0.167289	0.18797	11890781	11890781	1	0.47	0.0646	0.00256	2028	473.727	1.65275e+06	1869306	0	0	0.4	0.636578	473.727
Burundi	3506219	2131000	5442000	0.167289	0.18797	11890781	11890781	1	0.47	0.0646	0.00256	2029	480.395	1.65275e+06	1869306	0	0	0.4	0.718289	480.395
Burundi	3506219	2131000	5442000	0.167289	0.18797	11890781	11890781	1	0.47	0.0646	0.00256	2030	487.338	1.65275e+06	1869306	0	0	0.4	0.8	487.338
Cameroon	6900814	4506000	10120000	0.141628	0.177402	26545864	26545864	1	0.382	0.0447	0.00256	2020	838.393	3308312	3799263			0.4		838.393
Cameroon	6900814	4506000	10120000	0.141628	0.177402	26545864	26545864	1	0.382	0.0447	0.00256	2021	849.631	3308312	3799263	0.4	0.8	0.4	0.0447	849.631
Cameroon	6900814	4506000	10120000	0.141628	0.177402	26545864	26545864	1	0.382	0.0447	0.00256	2022	862.104	3308312	3799263	0.4	0.6	0.4	0.128622	862.104
Cameroon	6900814	4506000	10120000	0.141628	0.177402	26545864	26545864	1	0.382	0.0447	0.00256	2023	874.514	3308312	3799263	0.4	0.4	0.4	0.212544	874.514
Cameroon	6900814	4506000	10120000	0.141628	0.177402	26545864	26545864	1	0.382	0.0447	0.00256	2024	887.202	3308312	3799263	0.4	0.2	0.4	0.296467	887.202
Cameroon	6900814	4506000	10120000	0.141628	0.177402	26545864	26545864	1	0.382	0.0447	0.00256	2025	900.063	3308312	3799263	0	0	0.4	0.380389	900.063
Cameroon	6900814	4506000	10120000	0.141628	0.177402	26545864	26545864	1	0.382	0.0447	0.00256	2026	915.055	3308312	3799263	0	0	0.4	0.464311	915.055
Cameroon	6900814	4506000	10120000	0.141628	0.177402	26545864	26545864	1	0.382	0.0447	0.00256	2027	925.631	3308312	3799263	0	0	0.4	0.548233	925.631
Cameroon	6900814	4506000	10120000	0.141628	0.177402	26545864	26545864	1	0.382	0.0447	0.00256	2028	938.644	3308312	3799263	0	0	0.4	0.632156	938.644
Cameroon	6900814	4506000	10120000	0.141628	0.177402	26545864	26545864	1	0.382	0.0447	0.00256	2029	951.583	3308312	3799263	0	0	0.4	0.716078	951.583
Cameroon	6900814	4506000	10120000	0.141628	0.177402	26545864	26545864	1	0.382	0.0447	0.00256	2030	964.326	3308312	3799263	0	0	0.4	0.8	964.326
Central African Republic	1622774	831000	2900000	0.152955	0.175089	4829764	4829764	1	0.341	0.0145	0.00266216	2020	149.865	589805	699480			0.4		149.865
Central African Republic	1622774	831000	2900000	0.152955	0.175089	4829764	4829764	1	0.341	0.0145	0.00266216	2021	151.593	589805	699480	0.4	0.8	0.4	0.0145	151.593
Central African Republic	1622774	831000	2900000	0.152955	0.175089	4829764	4829764	1	0.341	0.0145	0.00266216	2022	154.592	589805	699480	0.4	0.6	0.4	0.101778	154.592
Central African Republic	1622774	831000	2900000	0.152955	0.175089	4829764	4829764	1	0.341	0.0145	0.00266216	2023	157.902	589805	699480	0.4	0.4	0.4	0.189056	157.902
Central African Republic	1622774	831000	2900000	0.152955	0.175089	4829764	4829764	1	0.341	0.0145	0.00266216	2024	161.392	589805	699480	0.4	0.2	0.4	0.276333	161.392
Central African Republic	1622774	831000	2900000	0.152955	0.175089	4829764	4829764	1	0.341	0.0145	0.00266216	2025	164.768	589805	699480	0	0	0.4	0.363611	164.768
Central African Republic	1622774	831000	2900000	0.152955	0.175089	4829764	4829764	1	0.341	0.0145	0.00266216	2026	169.714	589805	699480	0	0	0.4	0.450889	169.714
Central African Republic	1622774	831000	2900000	0.152955	0.175089	4829764	4829764	1	0.341	0.0145	0.00266216	2027	169.789	589805	699480	0	0	0.4	0.538167	169.789
Central African Republic	1622774	831000	2900000	0.152955	0.175089	4829764	4829764	1	0.341	0.0145	0.00266216	2028	172.07	589805	699480	0	0	0.4	0.625444	172.07
Central African Republic	1622774	831000	2900000	0.152955	0.175089	4829764	4829764	1	0.341	0.0145	0.00266216	2029	174.165	589805	699480	0	0	0.4	0.712722	174.165
Central African Republic	1622774	831000	2900000	0.152955	0.175089	4829764	4829764	1	0.341	0.0145	0.00266216	2030	176.084	589805	699480	0	0	0.4	0.8	176.084
Chad	3351197	1870000	5676000	0.188331	0.205452	16425859	16245995	0.98905	0.269	0.0045	0.00314051	2020	604.028	2359522	2583337			0.4		597.414
Chad	3351197	1870000	5676000	0.188331	0.205452	16425859	16245995	0.98905	0.269	0.0045	0.00314051	2021	617.676	2359522	2583337	0.4	0.8	0.4	0.0045	610.912
Chad	3351197	1870000	5676000	0.188331	0.205452	16425859	16245995	0.98905	0.269	0.0045	0.00314051	2022	627.409	2359522	2583337	0.4	0.6	0.4	0.0928889	620.539
Chad	3351197	1870000	5676000	0.188331	0.205452	16425859	16245995	0.98905	0.269	0.0045	0.00314051	2023	639.254	2359522	2583337	0.4	0.4	0.4	0.181278	632.254
Chad	3351197	1870000	5676000	0.188331	0.205452	16425859	16245995	0.98905	0.269	0.0045	0.00314051	2024	651.025	2359522	2583337	0.4	0.2	0.4	0.269667	643.896
Chad	3351197	1870000	5676000	0.188331	0.205452	16425859	16245995	0.98905	0.269	0.0045	0.00314051	2025	662.623	2359522	2583337	0	0	0.4	0.358056	655.367
Chad	3351197	1870000	5676000	0.188331	0.205452	16425859	16245995	0.98905	0.269	0.0045	0.00314051	2026	675.594	2359522	2583337	0	0	0.4	0.446444	668.196
Chad	3351197	1870000	5676000	0.188331	0.205452	16425859	16245995	0.98905	0.269	0.0045	0.00314051	2027	684.219	2359522	2583337	0	0	0.4	0.534833	676.727
Chad	3351197	1870000	5676000	0.188331	0.205452	16425859	16245995	0.98905	0.269	0.0045	0.00314051	2028	694.897	2359522	2583337	0	0	0.4	0.623222	687.288
Chad	3351197	1870000	5676000	0.188331	0.205452	16425859	16245995	0.98905	0.269	0.0045	0.00314051	2029	705.496	2359522	2583337	0	0	0.4	0.711611	697.771
Chad	3351197	1870000	5676000	0.188331	0.205452	16425859	16245995	0.98905	0.269	0.0045	0.00314051	2030	716.015	2359522	2583337	0	0	0.4	0.8	708.175
Comoros	4546	3636.8	5455.2	0.111146	0.143951	869595	869595	1	0.267	0.00418182	0.00256	2020	25	98952	115969			0.4		25
Comoros	4546	3636.8	5455.2	0.111146	0.143951	869595	869595	1	0.267	0.00418182	0.00256	2021	25.1	98952	115969	0.4	0.8	0.4	0.00418182	25.1
Comoros	4546	3636.8	5455.2	0.111146	0.143951	869595	869595	1	0.267	0.00418182	0.00256	2022	25.442	98952	115969	0.4	0.6	0.4	0.0926061	25.442
Comoros	4546	3636.8	5455.2	0.111146	0.143951	869595	869595	1	0.267	0.00418182	0.00256	2023	25.682	98952	115969	0.4	0.4	0.4	0.18103	25.682
Comoros	4546	3636.8	5455.2	0.111146	0.143951	869595	869595	1	0.267	0.00418182	0.00256	2024	25.923	98952	115969	0.4	0.2	0.4	0.269455	25.923
Comoros	4546	3636.8	5455.2	0.111146	0.143951	869595	869595	1	0.267	0.00418182	0.00256	2025	26.156	98952	115969	0	0	0.4	0.357879	26.156
Comoros	4546	3636.8	5455.2	0.111146	0.143951	869595	869595	1	0.267	0.00418182	0.00256	2026	26.446	98952	115969	0	0	0.4	0.446303	26.446
Comoros	4546	3636.8	5455.2	0.111146	0.143951	869595	869595	1	0.267	0.00418182	0.00256	2027	26.582	98952	115969	0	0	0.4	0.534727	26.582
Comoros	4546	3636.8	5455.2	0.111146	0.143951	869595	869595	1	0.267	0.00418182	0.00256	2028	26.793	98952	115969	0	0	0.4	0.623152	26.793
Comoros	4546	3636.8	5455.2	0.111146	0.143951	869595	869595	1	0.267	0.00418182	0.00256	2029	27.009	98952	115969	0	0	0.4	0.711576	27.009
Comoros	4546	3636.8	5455.2	0.111146	0.143951	869595	869595	1	0.267	0.00418182	0.00256	2030	27.232	98952	115969	0	0	0.4	0.8	27.232
Congo	1176331	722000	1826000	0.133057	0.167274	5518092	5518092	1	0.25	0.0142	0.00256	2020	165.857	659652	782828			0.4		165.857
Congo	1176331	722000	1826000	0.133057	0.167274	5518092	5518092	1	0.25	0.0142	0.00256	2021	166.764	659652	782828	0.4	0.8	0.4	0.0142	166.764
Congo	1176331	722000	1826000	0.133057	0.167274	5518092	5518092	1	0.25	0.0142	0.00256	2022	170.931	659652	782828	0.4	0.6	0.4	0.101511	170.931
Congo	1176331	722000	1826000	0.133057	0.167274	5518092	5518092	1	0.25	0.0142	0.00256	2023	173.966	659652	782828	0.4	0.4	0.4	0.188822	173.966
Congo	1176331	722000	1826000	0.133057	0.167274	5518092	5518092	1	0.25	0.0142	0.00256	2024	177.199	659652	782828	0.4	0.2	0.4	0.276133	177.199
Congo	1176331	722000	1826000	0.133057	0.167274	5518092	5518092	1	0.25	0.0142	0.00256	2025	180.516	659652	782828	0	0	0.4	0.363444	180.516
Congo	1176331	722000	1826000	0.133057	0.167274	5518092	5518092	1	0.25	0.0142	0.00256	2026	184.813	659652	782828	0	0	0.4	0.450756	184.813
Congo	1176331	722000	1826000	0.133057	0.167274	5518092	5518092	1	0.25	0.0142	0.00256	2027	187.207	659652	782828	0	0	0.4	0.538067	187.207
Congo	1176331	722000	1826000	0.133057	0.167274	5518092	5518092	1	0.25	0.0142	0.00256	2028	190.674	659652	782828	0	0	0.4	0.625378	190.674
Congo	1176331	722000	1826000	0.133057	0.167274	5518092	5518092	1	0.25	0.0142	0.00256	2029	194.197	659652	782828	0	0	0.4	0.712689	194.197
Congo	1176331	722000	1826000	0.133057	0.167274	5518092	5518092	1	0.25	0.0142	0.00256	2030	197.764	659652	782828	0	0	0.4	0.8	197.764
C√¥te d'Ivoire	7571801	4087000	8000000	0.150219	0.174688	26378275	26378275	1	0.175	0.00717073	0.0028395	2020	847.914	3332841	3706066			0.4		847.914
C√¥te d'Ivoire	7571801	4087000	8000000	0.150219	0.174688	26378275	26378275	1	0.175	0.00717073	0.0028395	2021	865.648	3332841	3706066	0.4	0.8	0.4	0.00717073	865.648
C√¥te d'Ivoire	7571801	4087000	8000000	0.150219	0.174688	26378275	26378275	1	0.175	0.00717073	0.0028395	2022	878.629	3332841	3706066	0.4	0.6	0.4	0.0952629	878.629
C√¥te d'Ivoire	7571801	4087000	8000000	0.150219	0.174688	26378275	26378275	1	0.175	0.00717073	0.0028395	2023	893.686	3332841	3706066	0.4	0.4	0.4	0.183355	893.686
C√¥te d'Ivoire	7571801	4087000	8000000	0.150219	0.174688	26378275	26378275	1	0.175	0.00717073	0.0028395	2024	908.721	3332841	3706066	0.4	0.2	0.4	0.271447	908.721
C√¥te d'Ivoire	7571801	4087000	8000000	0.150219	0.174688	26378275	26378275	1	0.175	0.00717073	0.0028395	2025	923.841	3332841	3706066	0	0	0.4	0.359539	923.841
C√¥te d'Ivoire	7571801	4087000	8000000	0.150219	0.174688	26378275	26378275	1	0.175	0.00717073	0.0028395	2026	938.56	3332841	3706066	0	0	0.4	0.447631	938.56
C√¥te d'Ivoire	7571801	4087000	8000000	0.150219	0.174688	26378275	26378275	1	0.175	0.00717073	0.0028395	2027	954.032	3332841	3706066	0	0	0.4	0.535724	954.032
C√¥te d'Ivoire	7571801	4087000	8000000	0.150219	0.174688	26378275	26378275	1	0.175	0.00717073	0.0028395	2028	969.131	3332841	3706066	0	0	0.4	0.623816	969.131
C√¥te d'Ivoire	7571801	4087000	8000000	0.150219	0.174688	26378275	26378275	1	0.175	0.00717073	0.0028395	2029	984.03	3332841	3706066	0	0	0.4	0.711908	984.03
C√¥te d'Ivoire	7571801	4087000	8000000	0.150219	0.174688	26378275	26378275	1	0.175	0.00717073	0.0028395	2030	998.599	3332841	3706066	0	0	0.4	0.8	998.599
Democratic Republic of the Congo	29036471	22260000	37180000	0.151446	0.183643	89561400	89561400	1	0.292	0.01225	0.00256	2020	3252.42	12755264	14049918			0.4		3252.42
Democratic Republic of the Congo	29036471	22260000	37180000	0.151446	0.183643	89561400	89561400	1	0.292	0.01225	0.00256	2021	3316.15	12755264	14049918	0.4	0.8	0.4	0.01225	3316.15
Democratic Republic of the Congo	29036471	22260000	37180000	0.151446	0.183643	89561400	89561400	1	0.292	0.01225	0.00256	2022	3381.73	12755264	14049918	0.4	0.6	0.4	0.0997778	3381.73
Democratic Republic of the Congo	29036471	22260000	37180000	0.151446	0.183643	89561400	89561400	1	0.292	0.01225	0.00256	2023	3447.61	12755264	14049918	0.4	0.4	0.4	0.187306	3447.61
Democratic Republic of the Congo	29036471	22260000	37180000	0.151446	0.183643	89561400	89561400	1	0.292	0.01225	0.00256	2024	3514.61	12755264	14049918	0.4	0.2	0.4	0.274833	3514.61
Democratic Republic of the Congo	29036471	22260000	37180000	0.151446	0.183643	89561400	89561400	1	0.292	0.01225	0.00256	2025	3582.68	12755264	14049918	0	0	0.4	0.362361	3582.68
Democratic Republic of the Congo	29036471	22260000	37180000	0.151446	0.183643	89561400	89561400	1	0.292	0.01225	0.00256	2026	3658.51	12755264	14049918	0	0	0.4	0.449889	3658.51
Democratic Republic of the Congo	29036471	22260000	37180000	0.151446	0.183643	89561400	89561400	1	0.292	0.01225	0.00256	2027	3717.66	12755264	14049918	0	0	0.4	0.537417	3717.66
Democratic Republic of the Congo	29036471	22260000	37180000	0.151446	0.183643	89561400	89561400	1	0.292	0.01225	0.00256	2028	3786.91	12755264	14049918	0	0	0.4	0.624944	3786.91
Democratic Republic of the Congo	29036471	22260000	37180000	0.151446	0.183643	89561400	89561400	1	0.292	0.01225	0.00256	2029	3856.92	12755264	14049918	0	0	0.4	0.712472	3856.92
Democratic Republic of the Congo	29036471	22260000	37180000	0.151446	0.183643	89561400	89561400	1	0.292	0.01225	0.00256	2030	3927.29	12755264	14049918	0	0	0.4	0.8	3927.29
Equatorial Guinea	337892	190000	553000	0.128048	0.167713	1402985	1402985	1	0.332	0.026375	0.00256	2020	41.002	161571	177522			0.4		41.002
Equatorial Guinea	337892	190000	553000	0.128048	0.167713	1402985	1402985	1	0.332	0.026375	0.00256	2021	41.955	161571	177522	0.4	0.8	0.4	0.026375	41.955
Equatorial Guinea	337892	190000	553000	0.128048	0.167713	1402985	1402985	1	0.332	0.026375	0.00256	2022	42.999	161571	177522	0.4	0.6	0.4	0.112333	42.999
Equatorial Guinea	337892	190000	553000	0.128048	0.167713	1402985	1402985	1	0.332	0.026375	0.00256	2023	43.958	161571	177522	0.4	0.4	0.4	0.198292	43.958
Equatorial Guinea	337892	190000	553000	0.128048	0.167713	1402985	1402985	1	0.332	0.026375	0.00256	2024	44.871	161571	177522	0.4	0.2	0.4	0.28425	44.871
Equatorial Guinea	337892	190000	553000	0.128048	0.167713	1402985	1402985	1	0.332	0.026375	0.00256	2025	45.726	161571	177522	0	0	0.4	0.370208	45.726
Equatorial Guinea	337892	190000	553000	0.128048	0.167713	1402985	1402985	1	0.332	0.026375	0.00256	2026	46.559	161571	177522	0	0	0.4	0.456167	46.559
Equatorial Guinea	337892	190000	553000	0.128048	0.167713	1402985	1402985	1	0.332	0.026375	0.00256	2027	47.417	161571	177522	0	0	0.4	0.542125	47.417
Equatorial Guinea	337892	190000	553000	0.128048	0.167713	1402985	1402985	1	0.332	0.026375	0.00256	2028	48.172	161571	177522	0	0	0.4	0.628083	48.172
Equatorial Guinea	337892	190000	553000	0.128048	0.167713	1402985	1402985	1	0.332	0.026375	0.00256	2029	48.866	161571	177522	0	0	0.4	0.714042	48.866
Equatorial Guinea	337892	190000	553000	0.128048	0.167713	1402985	1402985	1	0.332	0.026375	0.00256	2030	49.501	161571	177522	0	0	0.4	0.8	49.501
Eritrea	158889	102000	221000	0.178306	0.22415	3546427	3546427	1	0.015	0.03055	0.00256	2020	101.412	397789	471338			0.4		101.412
Eritrea	158889	102000	221000	0.178306	0.22415	3546427	3546427	1	0.015	0.03055	0.00256	2021	104.946	397789	471338	0.4	0.8	0.4	0.03055	104.946
Eritrea	158889	102000	221000	0.178306	0.22415	3546427	3546427	1	0.015	0.03055	0.00256	2022	100.575	397789	471338	0.4	0.6	0.4	0.116044	100.575
Eritrea	158889	102000	221000	0.178306	0.22415	3546427	3546427	1	0.015	0.03055	0.00256	2023	100.126	397789	471338	0.4	0.4	0.4	0.201539	100.126
Eritrea	158889	102000	221000	0.178306	0.22415	3546427	3546427	1	0.015	0.03055	0.00256	2024	99.952	397789	471338	0.4	0.2	0.4	0.287033	99.952
Eritrea	158889	102000	221000	0.178306	0.22415	3546427	3546427	1	0.015	0.03055	0.00256	2025	100.291	397789	471338	0	0	0.4	0.372528	100.291
Eritrea	158889	102000	221000	0.178306	0.22415	3546427	3546427	1	0.015	0.03055	0.00256	2026	100.146	397789	471338	0	0	0.4	0.458022	100.146
Eritrea	158889	102000	221000	0.178306	0.22415	3546427	3546427	1	0.015	0.03055	0.00256	2027	102.614	397789	471338	0	0	0.4	0.543517	102.614
Eritrea	158889	102000	221000	0.178306	0.22415	3546427	3546427	1	0.015	0.03055	0.00256	2028	104.347	397789	471338	0	0	0.4	0.629011	104.347
Eritrea	158889	102000	221000	0.178306	0.22415	3546427	3546427	1	0.015	0.03055	0.00256	2029	106.239	397789	471338	0	0	0.4	0.714506	106.239
Eritrea	158889	102000	221000	0.178306	0.22415	3546427	3546427	1	0.015	0.03055	0.00256	2030	108.129	397789	471338	0	0	0.4	0.8	108.129
Eswatini	233	186.4	279.6	0.0897607	0.146751	1160164	324845	0.279999	0.017	0.0161433	0.00256	2020	29.086	114988	141441			0.4		8.14406
Eswatini	233	186.4	279.6	0.0897607	0.146751	1160164	324845	0.279999	0.017	0.0161433	0.00256	2021	29.61	114988	141441	0.4	0.8	0.4	0.0161433	8.29078
Eswatini	233	186.4	279.6	0.0897607	0.146751	1160164	324845	0.279999	0.017	0.0161433	0.00256	2022	28.426	114988	141441	0.4	0.6	0.4	0.103239	7.95926
Eswatini	233	186.4	279.6	0.0897607	0.146751	1160164	324845	0.279999	0.017	0.0161433	0.00256	2023	27.989	114988	141441	0.4	0.4	0.4	0.190334	7.8369
Eswatini	233	186.4	279.6	0.0897607	0.146751	1160164	324845	0.279999	0.017	0.0161433	0.00256	2024	27.614	114988	141441	0.4	0.2	0.4	0.277429	7.7319
Eswatini	233	186.4	279.6	0.0897607	0.146751	1160164	324845	0.279999	0.017	0.0161433	0.00256	2025	27.386	114988	141441	0	0	0.4	0.364524	7.66806
Eswatini	233	186.4	279.6	0.0897607	0.146751	1160164	324845	0.279999	0.017	0.0161433	0.00256	2026	27.043	114988	141441	0	0	0.4	0.451619	7.57202
Eswatini	233	186.4	279.6	0.0897607	0.146751	1160164	324845	0.279999	0.017	0.0161433	0.00256	2027	27.371	114988	141441	0	0	0.4	0.538714	7.66386
Eswatini	233	186.4	279.6	0.0897607	0.146751	1160164	324845	0.279999	0.017	0.0161433	0.00256	2028	27.547	114988	141441	0	0	0.4	0.62581	7.71314
Eswatini	233	186.4	279.6	0.0897607	0.146751	1160164	324845	0.279999	0.017	0.0161433	0.00256	2029	27.797	114988	141441	0	0	0.4	0.712905	7.78314
Eswatini	233	186.4	279.6	0.0897607	0.146751	1160164	324845	0.279999	0.017	0.0161433	0.00256	2030	28.083	114988	141441	0	0	0.4	0.8	7.86322
Ethiopia	4231328	2340000	6335000	0.166627	0.198949	114963596	78175245	0.68	0.077	0.0164783	0.00256	2020	3419.65	13521324	15530949			0.4		2325.36
Ethiopia	4231328	2340000	6335000	0.166627	0.198949	114963596	78175245	0.68	0.077	0.0164783	0.00256	2021	3467.35	13521324	15530949	0.4	0.8	0.4	0.0164783	2357.8
Ethiopia	4231328	2340000	6335000	0.166627	0.198949	114963596	78175245	0.68	0.077	0.0164783	0.00256	2022	3506.47	13521324	15530949	0.4	0.6	0.4	0.103536	2384.4
Ethiopia	4231328	2340000	6335000	0.166627	0.198949	114963596	78175245	0.68	0.077	0.0164783	0.00256	2023	3546.15	13521324	15530949	0.4	0.4	0.4	0.190594	2411.38
Ethiopia	4231328	2340000	6335000	0.166627	0.198949	114963596	78175245	0.68	0.077	0.0164783	0.00256	2024	3582.42	13521324	15530949	0.4	0.2	0.4	0.277652	2436.04
Ethiopia	4231328	2340000	6335000	0.166627	0.198949	114963596	78175245	0.68	0.077	0.0164783	0.00256	2025	3614.82	13521324	15530949	0	0	0.4	0.36471	2458.07
Ethiopia	4231328	2340000	6335000	0.166627	0.198949	114963596	78175245	0.68	0.077	0.0164783	0.00256	2026	3645	13521324	15530949	0	0	0.4	0.451768	2478.6
Ethiopia	4231328	2340000	6335000	0.166627	0.198949	114963596	78175245	0.68	0.077	0.0164783	0.00256	2027	3667.96	13521324	15530949	0	0	0.4	0.538826	2494.21
Ethiopia	4231328	2340000	6335000	0.166627	0.198949	114963596	78175245	0.68	0.077	0.0164783	0.00256	2028	3689.53	13521324	15530949	0	0	0.4	0.625884	2508.88
Ethiopia	4231328	2340000	6335000	0.166627	0.198949	114963596	78175245	0.68	0.077	0.0164783	0.00256	2029	3708.64	13521324	15530949	0	0	0.4	0.712942	2521.88
Ethiopia	4231328	2340000	6335000	0.166627	0.198949	114963596	78175245	0.68	0.077	0.0164783	0.00256	2030	3725.92	13521324	15530949	0	0	0.4	0.8	2533.63
Gabon	479563	259000	818000	0.117732	0.146072	2225728	2225728	1	0.259	0.028	0.00256	2020	65.363	258252	288894			0.4		65.363
Gabon	479563	259000	818000	0.117732	0.146072	2225728	2225728	1	0.259	0.028	0.00256	2021	65.902	258252	288894	0.4	0.8	0.4	0.028	65.902
Gabon	479563	259000	818000	0.117732	0.146072	2225728	2225728	1	0.259	0.028	0.00256	2022	65.143	258252	288894	0.4	0.6	0.4	0.113778	65.143
Gabon	479563	259000	818000	0.117732	0.146072	2225728	2225728	1	0.259	0.028	0.00256	2023	64.595	258252	288894	0.4	0.4	0.4	0.199556	64.595
Gabon	479563	259000	818000	0.117732	0.146072	2225728	2225728	1	0.259	0.028	0.00256	2024	64.05	258252	288894	0.4	0.2	0.4	0.285333	64.05
Gabon	479563	259000	818000	0.117732	0.146072	2225728	2225728	1	0.259	0.028	0.00256	2025	63.692	258252	288894	0	0	0.4	0.371111	63.692
Gabon	479563	259000	818000	0.117732	0.146072	2225728	2225728	1	0.259	0.028	0.00256	2026	62.446	258252	288894	0	0	0.4	0.456889	62.446
Gabon	479563	259000	818000	0.117732	0.146072	2225728	2225728	1	0.259	0.028	0.00256	2027	63.919	258252	288894	0	0	0.4	0.542667	63.919
Gabon	479563	259000	818000	0.117732	0.146072	2225728	2225728	1	0.259	0.028	0.00256	2028	64.273	258252	288894	0	0	0.4	0.628444	64.273
Gabon	479563	259000	818000	0.117732	0.146072	2225728	2225728	1	0.259	0.028	0.00256	2029	64.687	258252	288894	0	0	0.4	0.714222	64.687
Gabon	479563	259000	818000	0.117732	0.146072	2225728	2225728	1	0.259	0.028	0.00256	2030	65.085	258252	288894	0	0	0.4	0.8	65.085
Gambia	210897	148000	301000	0.1402	0.171906	2416664	2416664	1	0.067	0.0168462	0.00566177	2020	84.176	329955	362604			0.4		84.176
Gambia	210897	148000	301000	0.1402	0.171906	2416664	2416664	1	0.067	0.0168462	0.00566177	2021	85.773	329955	362604	0.4	0.8	0.4	0.0168462	85.773
Gambia	210897	148000	301000	0.1402	0.171906	2416664	2416664	1	0.067	0.0168462	0.00566177	2022	87.106	329955	362604	0.4	0.6	0.4	0.103863	87.106
Gambia	210897	148000	301000	0.1402	0.171906	2416664	2416664	1	0.067	0.0168462	0.00566177	2023	88.511	329955	362604	0.4	0.4	0.4	0.19088	88.511
Gambia	210897	148000	301000	0.1402	0.171906	2416664	2416664	1	0.067	0.0168462	0.00566177	2024	89.891	329955	362604	0.4	0.2	0.4	0.277897	89.891
Gambia	210897	148000	301000	0.1402	0.171906	2416664	2416664	1	0.067	0.0168462	0.00566177	2025	91.258	329955	362604	0	0	0.4	0.364915	91.258
Gambia	210897	148000	301000	0.1402	0.171906	2416664	2416664	1	0.067	0.0168462	0.00566177	2026	92.584	329955	362604	0	0	0.4	0.451932	92.584
Gambia	210897	148000	301000	0.1402	0.171906	2416664	2416664	1	0.067	0.0168462	0.00566177	2027	93.847	329955	362604	0	0	0.4	0.538949	93.847
Gambia	210897	148000	301000	0.1402	0.171906	2416664	2416664	1	0.067	0.0168462	0.00566177	2028	95.118	329955	362604	0	0	0.4	0.625966	95.118
Gambia	210897	148000	301000	0.1402	0.171906	2416664	2416664	1	0.067	0.0168462	0.00566177	2029	96.359	329955	362604	0	0	0.4	0.712983	96.359
Gambia	210897	148000	301000	0.1402	0.171906	2416664	2416664	1	0.067	0.0168462	0.00566177	2030	97.56	329955	362604	0	0	0.4	0.8	97.56
Ghana	5060166	3467000	7087000	0.126288	0.155501	31072945	31072945	1	0.501	0.0220263	0.00256	2020	841.541	3343415	3.95398e+06			0.4		841.541
Ghana	5060166	3467000	7087000	0.126288	0.155501	31072945	31072945	1	0.501	0.0220263	0.00256	2021	843.507	3343415	3.95398e+06	0.4	0.8	0.4	0.0220263	843.507
Ghana	5060166	3467000	7087000	0.126288	0.155501	31072945	31072945	1	0.501	0.0220263	0.00256	2022	858.082	3343415	3.95398e+06	0.4	0.6	0.4	0.108468	858.082
Ghana	5060166	3467000	7087000	0.126288	0.155501	31072945	31072945	1	0.501	0.0220263	0.00256	2023	867.136	3343415	3.95398e+06	0.4	0.4	0.4	0.194909	867.136
Ghana	5060166	3467000	7087000	0.126288	0.155501	31072945	31072945	1	0.501	0.0220263	0.00256	2024	876.129	3343415	3.95398e+06	0.4	0.2	0.4	0.281351	876.129
Ghana	5060166	3467000	7087000	0.126288	0.155501	31072945	31072945	1	0.501	0.0220263	0.00256	2025	884.629	3343415	3.95398e+06	0	0	0.4	0.367792	884.629
Ghana	5060166	3467000	7087000	0.126288	0.155501	31072945	31072945	1	0.501	0.0220263	0.00256	2026	895.02	3343415	3.95398e+06	0	0	0.4	0.454234	895.02
Ghana	5060166	3467000	7087000	0.126288	0.155501	31072945	31072945	1	0.501	0.0220263	0.00256	2027	899.893	3343415	3.95398e+06	0	0	0.4	0.540675	899.893
Ghana	5060166	3467000	7087000	0.126288	0.155501	31072945	31072945	1	0.501	0.0220263	0.00256	2028	907.121	3343415	3.95398e+06	0	0	0.4	0.627117	907.121
Ghana	5060166	3467000	7087000	0.126288	0.155501	31072945	31072945	1	0.501	0.0220263	0.00256	2029	914.348	3343415	3.95398e+06	0	0	0.4	0.713558	914.348
Ghana	5060166	3467000	7087000	0.126288	0.155501	31072945	31072945	1	0.501	0.0220263	0.00256	2030	921.749	3343415	3.95398e+06	0	0	0.4	0.8	921.749
Guinea	4196430	2549000	6522000	0.162981	0.191719	13132792	13132792	1	0.248	0.0217333	0.00256	2020	430.764	1693517	1901773			0.4		430.764
Guinea	4196430	2549000	6522000	0.162981	0.191719	13132792	13132792	1	0.248	0.0217333	0.00256	2021	440.516	1693517	1901773	0.4	0.8	0.4	0.0217333	440.516
Guinea	4196430	2549000	6522000	0.162981	0.191719	13132792	13132792	1	0.248	0.0217333	0.00256	2022	446.474	1693517	1901773	0.4	0.6	0.4	0.108207	446.474
Guinea	4196430	2549000	6522000	0.162981	0.191719	13132792	13132792	1	0.248	0.0217333	0.00256	2023	454.144	1693517	1901773	0.4	0.4	0.4	0.194681	454.144
Guinea	4196430	2549000	6522000	0.162981	0.191719	13132792	13132792	1	0.248	0.0217333	0.00256	2024	461.687	1693517	1901773	0.4	0.2	0.4	0.281156	461.687
Guinea	4196430	2549000	6522000	0.162981	0.191719	13132792	13132792	1	0.248	0.0217333	0.00256	2025	469.118	1693517	1901773	0	0	0.4	0.36763	469.118
Guinea	4196430	2549000	6522000	0.162981	0.191719	13132792	13132792	1	0.248	0.0217333	0.00256	2026	477.263	1693517	1901773	0	0	0.4	0.454104	477.263
Guinea	4196430	2549000	6522000	0.162981	0.191719	13132792	13132792	1	0.248	0.0217333	0.00256	2027	483.181	1693517	1901773	0	0	0.4	0.540578	483.181
Guinea	4196430	2549000	6522000	0.162981	0.191719	13132792	13132792	1	0.248	0.0217333	0.00256	2028	489.967	1693517	1901773	0	0	0.4	0.627052	489.967
Guinea	4196430	2549000	6522000	0.162981	0.191719	13132792	13132792	1	0.248	0.0217333	0.00256	2029	496.557	1693517	1901773	0	0	0.4	0.713526	496.557
Guinea	4196430	2549000	6522000	0.162981	0.191719	13132792	13132792	1	0.248	0.0217333	0.00256	2030	502.933	1693517	1901773	0	0	0.4	0.8	502.933
Guinea-Bissau	174987	48000	474000	0.158435	0.175299	1967998	1967998	1	0.28	0.025	0.00637202	2020	61.988	244867	282651			0.4		61.988
Guinea-Bissau	174987	48000	474000	0.158435	0.175299	1967998	1967998	1	0.28	0.025	0.00637202	2021	62.476	244867	282651	0.4	0.8	0.4	0.025	62.476
Guinea-Bissau	174987	48000	474000	0.158435	0.175299	1967998	1967998	1	0.28	0.025	0.00637202	2022	63.204	244867	282651	0.4	0.6	0.4	0.111111	63.204
Guinea-Bissau	174987	48000	474000	0.158435	0.175299	1967998	1967998	1	0.28	0.025	0.00637202	2023	63.801	244867	282651	0.4	0.4	0.4	0.197222	63.801
Guinea-Bissau	174987	48000	474000	0.158435	0.175299	1967998	1967998	1	0.28	0.025	0.00637202	2024	64.406	244867	282651	0.4	0.2	0.4	0.283333	64.406
Guinea-Bissau	174987	48000	474000	0.158435	0.175299	1967998	1967998	1	0.28	0.025	0.00637202	2025	65.023	244867	282651	0	0	0.4	0.369444	65.023
Guinea-Bissau	174987	48000	474000	0.158435	0.175299	1967998	1967998	1	0.28	0.025	0.00637202	2026	65.691	244867	282651	0	0	0.4	0.455556	65.691
Guinea-Bissau	174987	48000	474000	0.158435	0.175299	1967998	1967998	1	0.28	0.025	0.00637202	2027	66.264	244867	282651	0	0	0.4	0.541667	66.264
Guinea-Bissau	174987	48000	474000	0.158435	0.175299	1967998	1967998	1	0.28	0.025	0.00637202	2028	66.911	244867	282651	0	0	0.4	0.627778	66.911
Guinea-Bissau	174987	48000	474000	0.158435	0.175299	1967998	1967998	1	0.28	0.025	0.00637202	2029	67.575	244867	282651	0	0	0.4	0.713889	67.575
Guinea-Bissau	174987	48000	474000	0.158435	0.175299	1967998	1967998	1	0.28	0.025	0.00637202	2030	68.249	244867	282651	0	0	0.4	0.8	68.249
Kenya	2738383	1564000	4452000	0.136592	0.174408	53771298	53771298	1	0.271	0.0331667	0.00354138	2020	1412	5636629	6983078			0.4		1412
Kenya	2738383	1564000	4452000	0.136592	0.174408	53771298	53771298	1	0.271	0.0331667	0.00354138	2021	1418.38	5636629	6983078	0.4	0.8	0.4	0.0331667	1418.38
Kenya	2738383	1564000	4452000	0.136592	0.174408	53771298	53771298	1	0.271	0.0331667	0.00354138	2022	1455.45	5636629	6983078	0.4	0.6	0.4	0.11837	1455.45
Kenya	2738383	1564000	4452000	0.136592	0.174408	53771298	53771298	1	0.271	0.0331667	0.00354138	2023	1483.75	5636629	6983078	0.4	0.4	0.4	0.203574	1483.75
Kenya	2738383	1564000	4452000	0.136592	0.174408	53771298	53771298	1	0.271	0.0331667	0.00354138	2024	1511.59	5636629	6983078	0.4	0.2	0.4	0.288778	1511.59
Kenya	2738383	1564000	4452000	0.136592	0.174408	53771298	53771298	1	0.271	0.0331667	0.00354138	2025	1535.96	5636629	6983078	0	0	0.4	0.373981	1535.96
Kenya	2738383	1564000	4452000	0.136592	0.174408	53771298	53771298	1	0.271	0.0331667	0.00354138	2026	1578.17	5636629	6983078	0	0	0.4	0.459185	1578.17
Kenya	2738383	1564000	4452000	0.136592	0.174408	53771298	53771298	1	0.271	0.0331667	0.00354138	2027	1569.72	5636629	6983078	0	0	0.4	0.544389	1569.72
Kenya	2738383	1564000	4452000	0.136592	0.174408	53771298	53771298	1	0.271	0.0331667	0.00354138	2028	1582.58	5636629	6983078	0	0	0.4	0.629593	1582.58
Kenya	2738383	1564000	4452000	0.136592	0.174408	53771298	53771298	1	0.271	0.0331667	0.00354138	2029	1594.5	5636629	6983078	0	0	0.4	0.714796	1594.5
Kenya	2738383	1564000	4452000	0.136592	0.174408	53771298	53771298	1	0.271	0.0331667	0.00354138	2030	1606.74	5636629	6983078	0	0	0.4	0.8	1606.74
Liberia	1810880	1070000	2861000	0.131364	0.16793	5057677	5057677	1	0.655	0.0306	0.00256	2020	150.879	595505	687821			0.4		150.879
Liberia	1810880	1070000	2861000	0.131364	0.16793	5057677	5057677	1	0.655	0.0306	0.00256	2021	153.396	595505	687821	0.4	0.8	0.4	0.0306	153.396
Liberia	1810880	1070000	2861000	0.131364	0.16793	5057677	5057677	1	0.655	0.0306	0.00256	2022	155.869	595505	687821	0.4	0.6	0.4	0.116089	155.869
Liberia	1810880	1070000	2861000	0.131364	0.16793	5057677	5057677	1	0.655	0.0306	0.00256	2023	158.58	595505	687821	0.4	0.4	0.4	0.201578	158.58
Liberia	1810880	1070000	2861000	0.131364	0.16793	5057677	5057677	1	0.655	0.0306	0.00256	2024	161.281	595505	687821	0.4	0.2	0.4	0.287067	161.281
Liberia	1810880	1070000	2861000	0.131364	0.16793	5057677	5057677	1	0.655	0.0306	0.00256	2025	163.879	595505	687821	0	0	0.4	0.372556	163.879
Liberia	1810880	1070000	2861000	0.131364	0.16793	5057677	5057677	1	0.655	0.0306	0.00256	2026	167.113	595505	687821	0	0	0.4	0.458044	167.113
Liberia	1810880	1070000	2861000	0.131364	0.16793	5057677	5057677	1	0.655	0.0306	0.00256	2027	168.584	595505	687821	0	0	0.4	0.543533	168.584
Liberia	1810880	1070000	2861000	0.131364	0.16793	5057677	5057677	1	0.655	0.0306	0.00256	2028	170.818	595505	687821	0	0	0.4	0.629022	170.818
Liberia	1810880	1070000	2861000	0.131364	0.16793	5057677	5057677	1	0.655	0.0306	0.00256	2029	172.998	595505	687821	0	0	0.4	0.714511	172.998
Liberia	1810880	1070000	2861000	0.131364	0.16793	5057677	5057677	1	0.655	0.0306	0.00256	2030	175.146	595505	687821	0	0	0.4	0.8	175.146
Madagascar	3695590	2759000	4729000	0.150414	0.182245	27691019	27691019	1	0.101	0.00769231	0.00256	2020	843.286	3321929	3.72485e+06			0.4		843.286
Madagascar	3695590	2759000	4729000	0.150414	0.182245	27691019	27691019	1	0.101	0.00769231	0.00256	2021	865.217	3321929	3.72485e+06	0.4	0.8	0.4	0.00769231	865.217
Madagascar	3695590	2759000	4729000	0.150414	0.182245	27691019	27691019	1	0.101	0.00769231	0.00256	2022	876.093	3321929	3.72485e+06	0.4	0.6	0.4	0.0957265	876.093
Madagascar	3695590	2759000	4729000	0.150414	0.182245	27691019	27691019	1	0.101	0.00769231	0.00256	2023	891.638	3321929	3.72485e+06	0.4	0.4	0.4	0.183761	891.638
Madagascar	3695590	2759000	4729000	0.150414	0.182245	27691019	27691019	1	0.101	0.00769231	0.00256	2024	906.738	3321929	3.72485e+06	0.4	0.2	0.4	0.271795	906.738
Madagascar	3695590	2759000	4729000	0.150414	0.182245	27691019	27691019	1	0.101	0.00769231	0.00256	2025	921.537	3321929	3.72485e+06	0	0	0.4	0.359829	921.537
Madagascar	3695590	2759000	4729000	0.150414	0.182245	27691019	27691019	1	0.101	0.00769231	0.00256	2026	936.156	3321929	3.72485e+06	0	0	0.4	0.447863	936.156
Madagascar	3695590	2759000	4729000	0.150414	0.182245	27691019	27691019	1	0.101	0.00769231	0.00256	2027	950.828	3321929	3.72485e+06	0	0	0.4	0.535897	950.828
Madagascar	3695590	2759000	4729000	0.150414	0.182245	27691019	27691019	1	0.101	0.00769231	0.00256	2028	964.833	3321929	3.72485e+06	0	0	0.4	0.623932	964.833
Madagascar	3695590	2759000	4729000	0.150414	0.182245	27691019	27691019	1	0.101	0.00769231	0.00256	2029	978.218	3321929	3.72485e+06	0	0	0.4	0.711966	978.218
Madagascar	3695590	2759000	4729000	0.150414	0.182245	27691019	27691019	1	0.101	0.00769231	0.00256	2030	990.891	3321929	3.72485e+06	0	0	0.4	0.8	990.891
Malawi	4370301	2354000	7403000	0.13661	0.182364	19129955	19129955	1	0.294	0.0343333	0.00256	2020	594.082	2.35278e+06	2764866			0.4		594.082
Malawi	4370301	2354000	7403000	0.13661	0.182364	19129955	19129955	1	0.294	0.0343333	0.00256	2021	605.505	2.35278e+06	2764866	0.4	0.8	0.4	0.0343333	605.505
Malawi	4370301	2354000	7403000	0.13661	0.182364	19129955	19129955	1	0.294	0.0343333	0.00256	2022	621.377	2.35278e+06	2764866	0.4	0.6	0.4	0.119407	621.377
Malawi	4370301	2354000	7403000	0.13661	0.182364	19129955	19129955	1	0.294	0.0343333	0.00256	2023	637.053	2.35278e+06	2764866	0.4	0.4	0.4	0.204481	637.053
Malawi	4370301	2354000	7403000	0.13661	0.182364	19129955	19129955	1	0.294	0.0343333	0.00256	2024	652.537	2.35278e+06	2764866	0.4	0.2	0.4	0.289556	652.537
Malawi	4370301	2354000	7403000	0.13661	0.182364	19129955	19129955	1	0.294	0.0343333	0.00256	2025	666.88	2.35278e+06	2764866	0	0	0.4	0.37463	666.88
Malawi	4370301	2354000	7403000	0.13661	0.182364	19129955	19129955	1	0.294	0.0343333	0.00256	2026	687.051	2.35278e+06	2764866	0	0	0.4	0.459704	687.051
Malawi	4370301	2354000	7403000	0.13661	0.182364	19129955	19129955	1	0.294	0.0343333	0.00256	2027	690.232	2.35278e+06	2764866	0	0	0.4	0.544778	690.232
Malawi	4370301	2354000	7403000	0.13661	0.182364	19129955	19129955	1	0.294	0.0343333	0.00256	2028	700.467	2.35278e+06	2764866	0	0	0.4	0.629852	700.467
Malawi	4370301	2354000	7403000	0.13661	0.182364	19129955	19129955	1	0.294	0.0343333	0.00256	2029	710.042	2.35278e+06	2764866	0	0	0.4	0.714926	710.042
Malawi	4370301	2354000	7403000	0.13661	0.182364	19129955	19129955	1	0.294	0.0343333	0.00256	2030	719.261	2.35278e+06	2764866	0	0	0.4	0.8	719.261
Mali	7238665	5124000	10280000	0.174126	0.191783	20250834	20250834	1	0.187	0.00856667	0.00256	2020	741.353	2904363	3223724			0.4		741.353
Mali	7238665	5124000	10280000	0.174126	0.191783	20250834	20250834	1	0.187	0.00856667	0.00256	2021	758.609	2904363	3223724	0.4	0.8	0.4	0.00856667	758.609
Mali	7238665	5124000	10280000	0.174126	0.191783	20250834	20250834	1	0.187	0.00856667	0.00256	2022	771.554	2904363	3223724	0.4	0.6	0.4	0.0965037	771.554
Mali	7238665	5124000	10280000	0.174126	0.191783	20250834	20250834	1	0.187	0.00856667	0.00256	2023	787.512	2904363	3223724	0.4	0.4	0.4	0.184441	787.512
Mali	7238665	5124000	10280000	0.174126	0.191783	20250834	20250834	1	0.187	0.00856667	0.00256	2024	804.007	2904363	3223724	0.4	0.2	0.4	0.272378	804.007
Mali	7238665	5124000	10280000	0.174126	0.191783	20250834	20250834	1	0.187	0.00856667	0.00256	2025	820.979	2904363	3223724	0	0	0.4	0.360315	820.979
Mali	7238665	5124000	10280000	0.174126	0.191783	20250834	20250834	1	0.187	0.00856667	0.00256	2026	840.839	2904363	3223724	0	0	0.4	0.448252	840.839
Mali	7238665	5124000	10280000	0.174126	0.191783	20250834	20250834	1	0.187	0.00856667	0.00256	2027	854.711	2904363	3223724	0	0	0.4	0.536189	854.711
Mali	7238665	5124000	10280000	0.174126	0.191783	20250834	20250834	1	0.187	0.00856667	0.00256	2028	872.029	2904363	3223724	0	0	0.4	0.624126	872.029
Mali	7238665	5124000	10280000	0.174126	0.191783	20250834	20250834	1	0.187	0.00856667	0.00256	2029	889.144	2904363	3223724	0	0	0.4	0.712063	889.144
Mali	7238665	5124000	10280000	0.174126	0.191783	20250834	20250834	1	0.187	0.00856667	0.00256	2030	905.772	2904363	3223724	0	0	0.4	0.8	905.772
Mauritania	139446	55000	250000	0.131037	0.176161	4649660	4649660	1	0.197	0.018	0.00596377	2020	140.538	555470	633144			0.4		140.538
Mauritania	139446	55000	250000	0.131037	0.176161	4649660	4649660	1	0.197	0.018	0.00596377	2021	142.28	555470	633144	0.4	0.8	0.4	0.018	142.28
Mauritania	139446	55000	250000	0.131037	0.176161	4649660	4649660	1	0.197	0.018	0.00596377	2022	145.133	555470	633144	0.4	0.6	0.4	0.104889	145.133
Mauritania	139446	55000	250000	0.131037	0.176161	4649660	4649660	1	0.197	0.018	0.00596377	2023	147.486	555470	633144	0.4	0.4	0.4	0.191778	147.486
Mauritania	139446	55000	250000	0.131037	0.176161	4649660	4649660	1	0.197	0.018	0.00596377	2024	149.838	555470	633144	0.4	0.2	0.4	0.278667	149.838
Mauritania	139446	55000	250000	0.131037	0.176161	4649660	4649660	1	0.197	0.018	0.00596377	2025	152.154	555470	633144	0	0	0.4	0.365556	152.154
Mauritania	139446	55000	250000	0.131037	0.176161	4649660	4649660	1	0.197	0.018	0.00596377	2026	154.765	555470	633144	0	0	0.4	0.452444	154.765
Mauritania	139446	55000	250000	0.131037	0.176161	4649660	4649660	1	0.197	0.018	0.00596377	2027	156.721	555470	633144	0	0	0.4	0.539333	156.721
Mauritania	139446	55000	250000	0.131037	0.176161	4649660	4649660	1	0.197	0.018	0.00596377	2028	158.986	555470	633144	0	0	0.4	0.626222	158.986
Mauritania	139446	55000	250000	0.131037	0.176161	4649660	4649660	1	0.197	0.018	0.00596377	2029	161.245	555470	633144	0	0	0.4	0.713111	161.245
Mauritania	139446	55000	250000	0.131037	0.176161	4649660	4649660	1	0.197	0.018	0.00596377	2030	163.503	555470	633144	0	0	0.4	0.8	163.503
Mozambique	10007802	7209000	13430000	0.165465	0.19869	31255435	31255435	1	0.327	0.01525	0.00256	2020	1057.32	4.1651e+06	4.66421e+06			0.4		1057.32
Mozambique	10007802	7209000	13430000	0.165465	0.19869	31255435	31255435	1	0.327	0.01525	0.00256	2021	1082.1	4.1651e+06	4.66421e+06	0.4	0.8	0.4	0.01525	1082.1
Mozambique	10007802	7209000	13430000	0.165465	0.19869	31255435	31255435	1	0.327	0.01525	0.00256	2022	1103	4.1651e+06	4.66421e+06	0.4	0.6	0.4	0.102444	1103
Mozambique	10007802	7209000	13430000	0.165465	0.19869	31255435	31255435	1	0.327	0.01525	0.00256	2023	1126.19	4.1651e+06	4.66421e+06	0.4	0.4	0.4	0.189639	1126.19
Mozambique	10007802	7209000	13430000	0.165465	0.19869	31255435	31255435	1	0.327	0.01525	0.00256	2024	1149.14	4.1651e+06	4.66421e+06	0.4	0.2	0.4	0.276833	1149.14
Mozambique	10007802	7209000	13430000	0.165465	0.19869	31255435	31255435	1	0.327	0.01525	0.00256	2025	1171.58	4.1651e+06	4.66421e+06	0	0	0.4	0.364028	1171.58
Mozambique	10007802	7209000	13430000	0.165465	0.19869	31255435	31255435	1	0.327	0.01525	0.00256	2026	1196.3	4.1651e+06	4.66421e+06	0	0	0.4	0.451222	1196.3
Mozambique	10007802	7209000	13430000	0.165465	0.19869	31255435	31255435	1	0.327	0.01525	0.00256	2027	1213.93	4.1651e+06	4.66421e+06	0	0	0.4	0.538417	1213.93
Mozambique	10007802	7209000	13430000	0.165465	0.19869	31255435	31255435	1	0.327	0.01525	0.00256	2028	1234.37	4.1651e+06	4.66421e+06	0	0	0.4	0.625611	1234.37
Mozambique	10007802	7209000	13430000	0.165465	0.19869	31255435	31255435	1	0.327	0.01525	0.00256	2029	1254.35	4.1651e+06	4.66421e+06	0	0	0.4	0.712806	1254.35
Mozambique	10007802	7209000	13430000	0.165465	0.19869	31255435	31255435	1	0.327	0.01525	0.00256	2030	1273.93	4.1651e+06	4.66421e+06	0	0	0.4	0.8	1273.93
Namibia	20258	16000	25000	0.124636	0.15286	2540916	2016852	0.79375	0.084	0.0141056	0.00256	2020	67.458	268881	323663			0.4		53.5448
Namibia	20258	16000	25000	0.124636	0.15286	2540916	2016852	0.79375	0.084	0.0141056	0.00256	2021	67.091	268881	323663	0.4	0.8	0.4	0.0141056	53.2535
Namibia	20258	16000	25000	0.124636	0.15286	2540916	2016852	0.79375	0.084	0.0141056	0.00256	2022	67.767	268881	323663	0.4	0.6	0.4	0.101427	53.7901
Namibia	20258	16000	25000	0.124636	0.15286	2540916	2016852	0.79375	0.084	0.0141056	0.00256	2023	67.897	268881	323663	0.4	0.4	0.4	0.188749	53.8932
Namibia	20258	16000	25000	0.124636	0.15286	2540916	2016852	0.79375	0.084	0.0141056	0.00256	2024	68.025	268881	323663	0.4	0.2	0.4	0.27607	53.9948
Namibia	20258	16000	25000	0.124636	0.15286	2540916	2016852	0.79375	0.084	0.0141056	0.00256	2025	68.151	268881	323663	0	0	0.4	0.363392	54.0949
Namibia	20258	16000	25000	0.124636	0.15286	2540916	2016852	0.79375	0.084	0.0141056	0.00256	2026	68.29	268881	323663	0	0	0.4	0.450714	54.2052
Namibia	20258	16000	25000	0.124636	0.15286	2540916	2016852	0.79375	0.084	0.0141056	0.00256	2027	68.365	268881	323663	0	0	0.4	0.538035	54.2647
Namibia	20258	16000	25000	0.124636	0.15286	2540916	2016852	0.79375	0.084	0.0141056	0.00256	2028	68.504	268881	323663	0	0	0.4	0.625357	54.375
Namibia	20258	16000	25000	0.124636	0.15286	2540916	2016852	0.79375	0.084	0.0141056	0.00256	2029	68.689	268881	323663	0	0	0.4	0.712678	54.5219
Namibia	20258	16000	25000	0.124636	0.15286	2540916	2016852	0.79375	0.084	0.0141056	0.00256	2030	68.929	268881	323663	0	0	0.4	0.8	54.7124
Niger	7845520	3807000	14670000	0.192486	0.208455	24206636	24206636	1	0.192	0.0212	0.00256	2020	992.274	3879464	4114589			0.4		992.274
Niger	7845520	3807000	14670000	0.192486	0.208455	24206636	24206636	1	0.192	0.0212	0.00256	2021	1023.41	3879464	4114589	0.4	0.8	0.4	0.0212	1023.41
Niger	7845520	3807000	14670000	0.192486	0.208455	24206636	24206636	1	0.192	0.0212	0.00256	2022	1054.47	3879464	4114589	0.4	0.6	0.4	0.107733	1054.47
Niger	7845520	3807000	14670000	0.192486	0.208455	24206636	24206636	1	0.192	0.0212	0.00256	2023	1087.07	3879464	4114589	0.4	0.4	0.4	0.194267	1087.07
Niger	7845520	3807000	14670000	0.192486	0.208455	24206636	24206636	1	0.192	0.0212	0.00256	2024	1120.52	3879464	4114589	0.4	0.2	0.4	0.2808	1120.52
Niger	7845520	3807000	14670000	0.192486	0.208455	24206636	24206636	1	0.192	0.0212	0.00256	2025	1154.68	3879464	4114589	0	0	0.4	0.367333	1154.68
Niger	7845520	3807000	14670000	0.192486	0.208455	24206636	24206636	1	0.192	0.0212	0.00256	2026	1191.94	3879464	4114589	0	0	0.4	0.453867	1191.94
Niger	7845520	3807000	14670000	0.192486	0.208455	24206636	24206636	1	0.192	0.0212	0.00256	2027	1223.16	3879464	4114589	0	0	0.4	0.5404	1223.16
Niger	7845520	3807000	14670000	0.192486	0.208455	24206636	24206636	1	0.192	0.0212	0.00256	2028	1258.44	3879464	4114589	0	0	0.4	0.626933	1258.44
Niger	7845520	3807000	14670000	0.192486	0.208455	24206636	24206636	1	0.192	0.0212	0.00256	2029	1294.22	3879464	4114589	0	0	0.4	0.713467	1294.22
Niger	7845520	3807000	14670000	0.192486	0.208455	24206636	24206636	1	0.192	0.0212	0.00256	2030	1330.39	3879464	4114589	0	0	0.4	0.8	1330.39
Nigeria	64677959	46460000	87350000	0.150709	0.182432	206139584	206139584	1	0.435	0.0124762	0.00256	2020	6944.56	27265172	30585722			0.4		6944.56
Nigeria	64677959	46460000	87350000	0.150709	0.182432	206139584	206139584	1	0.435	0.0124762	0.00256	2021	7042.43	27265172	30585722	0.4	0.8	0.4	0.0124762	7042.43
Nigeria	64677959	46460000	87350000	0.150709	0.182432	206139584	206139584	1	0.435	0.0124762	0.00256	2022	7167.8	27265172	30585722	0.4	0.6	0.4	0.0999788	7167.8
Nigeria	64677959	46460000	87350000	0.150709	0.182432	206139584	206139584	1	0.435	0.0124762	0.00256	2023	7286.88	27265172	30585722	0.4	0.4	0.4	0.187481	7286.88
Nigeria	64677959	46460000	87350000	0.150709	0.182432	206139584	206139584	1	0.435	0.0124762	0.00256	2024	7409.48	27265172	30585722	0.4	0.2	0.4	0.274984	7409.48
Nigeria	64677959	46460000	87350000	0.150709	0.182432	206139584	206139584	1	0.435	0.0124762	0.00256	2025	7534.17	27265172	30585722	0	0	0.4	0.362487	7534.17
Nigeria	64677959	46460000	87350000	0.150709	0.182432	206139584	206139584	1	0.435	0.0124762	0.00256	2026	7674.89	27265172	30585722	0	0	0.4	0.449989	7674.89
Nigeria	64677959	46460000	87350000	0.150709	0.182432	206139584	206139584	1	0.435	0.0124762	0.00256	2027	7776.69	27265172	30585722	0	0	0.4	0.537492	7776.69
Nigeria	64677959	46460000	87350000	0.150709	0.182432	206139584	206139584	1	0.435	0.0124762	0.00256	2028	7901.51	27265172	30585722	0	0	0.4	0.624995	7901.51
Nigeria	64677959	46460000	87350000	0.150709	0.182432	206139584	206139584	1	0.435	0.0124762	0.00256	2029	8027.61	27265172	30585722	0	0	0.4	0.712497	8027.61
Nigeria	64677959	46460000	87350000	0.150709	0.182432	206139584	206139584	1	0.435	0.0124762	0.00256	2030	8154.31	27265172	30585722	0	0	0.4	0.8	8154.31
Rwanda	2986047	2189000	3842000	0.129339	0.164707	12952209	12952209	1	0.196	0.0316364	0.00256	2020	388.018	1525301	1704087			0.4		388.018
Rwanda	2986047	2189000	3842000	0.129339	0.164707	12952209	12952209	1	0.196	0.0316364	0.00256	2021	399.662	1525301	1704087	0.4	0.8	0.4	0.0316364	399.662
Rwanda	2986047	2189000	3842000	0.129339	0.164707	12952209	12952209	1	0.196	0.0316364	0.00256	2022	391.778	1525301	1704087	0.4	0.6	0.4	0.11701	391.778
Rwanda	2986047	2189000	3842000	0.129339	0.164707	12952209	12952209	1	0.196	0.0316364	0.00256	2023	391.045	1525301	1704087	0.4	0.4	0.4	0.202384	391.045
Rwanda	2986047	2189000	3842000	0.129339	0.164707	12952209	12952209	1	0.196	0.0316364	0.00256	2024	390.267	1525301	1704087	0.4	0.2	0.4	0.287758	390.267
Rwanda	2986047	2189000	3842000	0.129339	0.164707	12952209	12952209	1	0.196	0.0316364	0.00256	2025	390.584	1525301	1704087	0	0	0.4	0.373131	390.584
Rwanda	2986047	2189000	3842000	0.129339	0.164707	12952209	12952209	1	0.196	0.0316364	0.00256	2026	386.939	1525301	1704087	0	0	0.4	0.458505	386.939
Rwanda	2986047	2189000	3842000	0.129339	0.164707	12952209	12952209	1	0.196	0.0316364	0.00256	2027	396.557	1525301	1704087	0	0	0.4	0.543879	396.557
Rwanda	2986047	2189000	3842000	0.129339	0.164707	12952209	12952209	1	0.196	0.0316364	0.00256	2028	400.637	1525301	1704087	0	0	0.4	0.629253	400.637
Rwanda	2986047	2189000	3842000	0.129339	0.164707	12952209	12952209	1	0.196	0.0316364	0.00256	2029	404.803	1525301	1704087	0	0	0.4	0.714626	404.803
Rwanda	2986047	2189000	3842000	0.129339	0.164707	12952209	12952209	1	0.196	0.0316364	0.00256	2030	408.579	1525301	1704087	0	0	0.4	0.8	408.579
Sao Tome and Principe	1933	1546.4	2319.6	0.108658	0.155861	219161	219161	1	0.014	0	0.00256	2020	6.404	25439	30789			0.4		6.404
Sao Tome and Principe	1933	1546.4	2319.6	0.108658	0.155861	219161	219161	1	0.014	0	0.00256	2021	6.462	25439	30789	0.4	0.8	0.4	0	6.462
Sao Tome and Principe	1933	1546.4	2319.6	0.108658	0.155861	219161	219161	1	0.014	0	0.00256	2022	6.523	25439	30789	0.4	0.6	0.4	0.0888889	6.523
Sao Tome and Principe	1933	1546.4	2319.6	0.108658	0.155861	219161	219161	1	0.014	0	0.00256	2023	6.603	25439	30789	0.4	0.4	0.4	0.177778	6.603
Sao Tome and Principe	1933	1546.4	2319.6	0.108658	0.155861	219161	219161	1	0.014	0	0.00256	2024	6.698	25439	30789	0.4	0.2	0.4	0.266667	6.698
Sao Tome and Principe	1933	1546.4	2319.6	0.108658	0.155861	219161	219161	1	0.014	0	0.00256	2025	6.806	25439	30789	0	0	0.4	0.355556	6.806
Sao Tome and Principe	1933	1546.4	2319.6	0.108658	0.155861	219161	219161	1	0.014	0	0.00256	2026	6.944	25439	30789	0	0	0.4	0.444444	6.944
Sao Tome and Principe	1933	1546.4	2319.6	0.108658	0.155861	219161	219161	1	0.014	0	0.00256	2027	7.034	25439	30789	0	0	0.4	0.533333	7.034
Sao Tome and Principe	1933	1546.4	2319.6	0.108658	0.155861	219161	219161	1	0.014	0	0.00256	2028	7.162	25439	30789	0	0	0.4	0.622222	7.162
Sao Tome and Principe	1933	1546.4	2319.6	0.108658	0.155861	219161	219161	1	0.014	0	0.00256	2029	7.289	25439	30789	0	0	0.4	0.711111	7.289
Sao Tome and Principe	1933	1546.4	2319.6	0.108658	0.155861	219161	219161	1	0.014	0	0.00256	2030	7.41	25439	30789	0	0	0.4	0.8	7.41
Senegal	836014	568000	1134000	0.136731	0.170999	16743930	16743930	1	0.047	0.00452174	0.00441576	2020	528.234	2100361	2467606			0.4		528.234
Senegal	836014	568000	1134000	0.136731	0.170999	16743930	16743930	1	0.047	0.00452174	0.00441576	2021	530.366	2100361	2467606	0.4	0.8	0.4	0.00452174	530.366
Senegal	836014	568000	1134000	0.136731	0.170999	16743930	16743930	1	0.047	0.00452174	0.00441576	2022	543.278	2100361	2467606	0.4	0.6	0.4	0.0929082	543.278
Senegal	836014	568000	1134000	0.136731	0.170999	16743930	16743930	1	0.047	0.00452174	0.00441576	2023	551.733	2100361	2467606	0.4	0.4	0.4	0.181295	551.733
Senegal	836014	568000	1134000	0.136731	0.170999	16743930	16743930	1	0.047	0.00452174	0.00441576	2024	560.409	2100361	2467606	0.4	0.2	0.4	0.269681	560.409
Senegal	836014	568000	1134000	0.136731	0.170999	16743930	16743930	1	0.047	0.00452174	0.00441576	2025	568.979	2100361	2467606	0	0	0.4	0.358068	568.979
Senegal	836014	568000	1134000	0.136731	0.170999	16743930	16743930	1	0.047	0.00452174	0.00441576	2026	579.628	2100361	2467606	0	0	0.4	0.446454	579.628
Senegal	836014	568000	1134000	0.136731	0.170999	16743930	16743930	1	0.047	0.00452174	0.00441576	2027	585.203	2100361	2467606	0	0	0.4	0.534841	585.203
Senegal	836014	568000	1134000	0.136731	0.170999	16743930	16743930	1	0.047	0.00452174	0.00441576	2028	593.383	2100361	2467606	0	0	0.4	0.623227	593.383
Senegal	836014	568000	1134000	0.136731	0.170999	16743930	16743930	1	0.047	0.00452174	0.00441576	2029	601.763	2100361	2467606	0	0	0.4	0.711614	601.763
Senegal	836014	568000	1134000	0.136731	0.170999	16743930	16743930	1	0.047	0.00452174	0.00441576	2030	610.455	2100361	2467606	0	0	0.4	0.8	610.455
Sierra Leone	2617968	1393000	4451000	0.144633	0.17005	7976985	7976985	1	0.57	0.002875	0.0061298	2020	236.123	929514	1078109			0.4		236.123
Sierra Leone	2617968	1393000	4451000	0.144633	0.17005	7976985	7976985	1	0.57	0.002875	0.0061298	2021	239.559	929514	1078109	0.4	0.8	0.4	0.002875	239.559
Sierra Leone	2617968	1393000	4451000	0.144633	0.17005	7976985	7976985	1	0.57	0.002875	0.0061298	2022	239	929514	1078109	0.4	0.6	0.4	0.0914444	239
Sierra Leone	2617968	1393000	4451000	0.144633	0.17005	7976985	7976985	1	0.57	0.002875	0.0061298	2023	240.097	929514	1078109	0.4	0.4	0.4	0.180014	240.097
Sierra Leone	2617968	1393000	4451000	0.144633	0.17005	7976985	7976985	1	0.57	0.002875	0.0061298	2024	241.139	929514	1078109	0.4	0.2	0.4	0.268583	241.139
Sierra Leone	2617968	1393000	4451000	0.144633	0.17005	7976985	7976985	1	0.57	0.002875	0.0061298	2025	242.249	929514	1078109	0	0	0.4	0.357153	242.249
Sierra Leone	2617968	1393000	4451000	0.144633	0.17005	7976985	7976985	1	0.57	0.002875	0.0061298	2026	243.394	929514	1078109	0	0	0.4	0.445722	243.394
Sierra Leone	2617968	1393000	4451000	0.144633	0.17005	7976985	7976985	1	0.57	0.002875	0.0061298	2027	244.621	929514	1078109	0	0	0.4	0.534292	244.621
Sierra Leone	2617968	1393000	4451000	0.144633	0.17005	7976985	7976985	1	0.57	0.002875	0.0061298	2028	245.881	929514	1078109	0	0	0.4	0.622861	245.881
Sierra Leone	2617968	1393000	4451000	0.144633	0.17005	7976985	7976985	1	0.57	0.002875	0.0061298	2029	247.136	929514	1078109	0	0	0.4	0.711431	247.136
Sierra Leone	2617968	1393000	4451000	0.144633	0.17005	7976985	7976985	1	0.57	0.002875	0.0061298	2030	248.344	929514	1078109	0	0	0.4	0.8	248.344
South Africa	4463	3570.4	5355.6	0.101071	0.138049	59308690	5930869	0.1	0.005	0.00906871	0.0121686	2020	1143.69	4595979	5.84403e+06			0.4		114.37
South Africa	4463	3570.4	5355.6	0.101071	0.138049	59308690	5930869	0.1	0.005	0.00906871	0.0121686	2021	1129.59	4595979	5.84403e+06	0.4	0.8	0.4	0.00906871	112.959
South Africa	4463	3570.4	5355.6	0.101071	0.138049	59308690	5930869	0.1	0.005	0.00906871	0.0121686	2022	1137.86	4595979	5.84403e+06	0.4	0.6	0.4	0.09695	113.786
South Africa	4463	3570.4	5355.6	0.101071	0.138049	59308690	5930869	0.1	0.005	0.00906871	0.0121686	2023	1135.65	4595979	5.84403e+06	0.4	0.4	0.4	0.184831	113.566
South Africa	4463	3570.4	5355.6	0.101071	0.138049	59308690	5930869	0.1	0.005	0.00906871	0.0121686	2024	1133.4	4595979	5.84403e+06	0.4	0.2	0.4	0.272712	113.34
South Africa	4463	3570.4	5355.6	0.101071	0.138049	59308690	5930869	0.1	0.005	0.00906871	0.0121686	2025	1130.69	4595979	5.84403e+06	0	0	0.4	0.360594	113.069
South Africa	4463	3570.4	5355.6	0.101071	0.138049	59308690	5930869	0.1	0.005	0.00906871	0.0121686	2026	1132.42	4595979	5.84403e+06	0	0	0.4	0.448475	113.242
South Africa	4463	3570.4	5355.6	0.101071	0.138049	59308690	5930869	0.1	0.005	0.00906871	0.0121686	2027	1125.15	4595979	5.84403e+06	0	0	0.4	0.536356	112.515
South Africa	4463	3570.4	5355.6	0.101071	0.138049	59308690	5930869	0.1	0.005	0.00906871	0.0121686	2028	1122.21	4595979	5.84403e+06	0	0	0.4	0.624237	112.221
South Africa	4463	3570.4	5355.6	0.101071	0.138049	59308690	5930869	0.1	0.005	0.00906871	0.0121686	2029	1119.54	4595979	5.84403e+06	0	0	0.4	0.712119	111.954
South Africa	4463	3570.4	5355.6	0.101071	0.138049	59308690	5930869	0.1	0.005	0.00906871	0.0121686	2030	1117.39	4595979	5.84403e+06	0	0	0.4	0.8	111.739
South Sudan	3211331	1752000	5412000	0.154903	0.181443	11193729	11193729	1	0.319	0.0197019	0.00340629	2020	348.681	1362259	1.55368e+06			0.4		348.681
South Sudan	3211331	1752000	5412000	0.154903	0.181443	11193729	11193729	1	0.319	0.0197019	0.00340629	2021	351.647	1362259	1.55368e+06	0.4	0.8	0.4	0.0197019	351.647
South Sudan	3211331	1752000	5412000	0.154903	0.181443	11193729	11193729	1	0.319	0.0197019	0.00340629	2022	353.961	1362259	1.55368e+06	0.4	0.6	0.4	0.106402	353.961
South Sudan	3211331	1752000	5412000	0.154903	0.181443	11193729	11193729	1	0.319	0.0197019	0.00340629	2023	360.304	1362259	1.55368e+06	0.4	0.4	0.4	0.193101	360.304
South Sudan	3211331	1752000	5412000	0.154903	0.181443	11193729	11193729	1	0.319	0.0197019	0.00340629	2024	367.045	1362259	1.55368e+06	0.4	0.2	0.4	0.279801	367.045
South Sudan	3211331	1752000	5412000	0.154903	0.181443	11193729	11193729	1	0.319	0.0197019	0.00340629	2025	373.016	1362259	1.55368e+06	0	0	0.4	0.366501	373.016
South Sudan	3211331	1752000	5412000	0.154903	0.181443	11193729	11193729	1	0.319	0.0197019	0.00340629	2026	379.428	1362259	1.55368e+06	0	0	0.4	0.453201	379.428
South Sudan	3211331	1752000	5412000	0.154903	0.181443	11193729	11193729	1	0.319	0.0197019	0.00340629	2027	381.091	1362259	1.55368e+06	0	0	0.4	0.539901	381.091
South Sudan	3211331	1752000	5412000	0.154903	0.181443	11193729	11193729	1	0.319	0.0197019	0.00340629	2028	384.493	1362259	1.55368e+06	0	0	0.4	0.6266	384.493
South Sudan	3211331	1752000	5412000	0.154903	0.181443	11193729	11193729	1	0.319	0.0197019	0.00340629	2029	387.956	1362259	1.55368e+06	0	0	0.4	0.7133	387.956
South Sudan	3211331	1752000	5412000	0.154903	0.181443	11193729	11193729	1	0.319	0.0197019	0.00340629	2030	391.77	1362259	1.55368e+06	0	0	0.4	0.8	391.77
Togo	1894656	1288000	2662000	0.139715	0.173987	8278737	8278737	1	0.311	0.0158333	0.00256	2020	248.396	980471	1135579			0.4		248.396
Togo	1894656	1288000	2662000	0.139715	0.173987	8278737	8278737	1	0.311	0.0158333	0.00256	2021	252.194	980471	1135579	0.4	0.8	0.4	0.0158333	252.194
Togo	1894656	1288000	2662000	0.139715	0.173987	8278737	8278737	1	0.311	0.0158333	0.00256	2022	255.699	980471	1135579	0.4	0.6	0.4	0.102963	255.699
Togo	1894656	1288000	2662000	0.139715	0.173987	8278737	8278737	1	0.311	0.0158333	0.00256	2023	259.683	980471	1135579	0.4	0.4	0.4	0.190093	259.683
Togo	1894656	1288000	2662000	0.139715	0.173987	8278737	8278737	1	0.311	0.0158333	0.00256	2024	263.821	980471	1135579	0.4	0.2	0.4	0.277222	263.821
Togo	1894656	1288000	2662000	0.139715	0.173987	8278737	8278737	1	0.311	0.0158333	0.00256	2025	268.063	980471	1135579	0	0	0.4	0.364352	268.063
Togo	1894656	1288000	2662000	0.139715	0.173987	8278737	8278737	1	0.311	0.0158333	0.00256	2026	273.204	980471	1135579	0	0	0.4	0.451481	273.204
Togo	1894656	1288000	2662000	0.139715	0.173987	8278737	8278737	1	0.311	0.0158333	0.00256	2027	276.657	980471	1135579	0	0	0.4	0.538611	276.657
Togo	1894656	1288000	2662000	0.139715	0.173987	8278737	8278737	1	0.311	0.0158333	0.00256	2028	281.057	980471	1135579	0	0	0.4	0.625741	281.057
Togo	1894656	1288000	2662000	0.139715	0.173987	8278737	8278737	1	0.311	0.0158333	0.00256	2029	285.439	980471	1135579	0	0	0.4	0.71287	285.439
Togo	1894656	1288000	2662000	0.139715	0.173987	8278737	8278737	1	0.311	0.0158333	0.00256	2030	289.747	980471	1135579	0	0	0.4	0.8	289.747
Uganda	12982097	8583000	20420000	0.164091	0.190665	45741000	45741000	1	0.715	0.0199048	0.00256	2020	1586.03	6270244	7205884			0.4		1586.03
Uganda	12982097	8583000	20420000	0.164091	0.190665	45741000	45741000	1	0.715	0.0199048	0.00256	2021	1603.93	6270244	7205884	0.4	0.8	0.4	0.0199048	1603.93
Uganda	12982097	8583000	20420000	0.164091	0.190665	45741000	45741000	1	0.715	0.0199048	0.00256	2022	1615.05	6270244	7205884	0.4	0.6	0.4	0.106582	1615.05
Uganda	12982097	8583000	20420000	0.164091	0.190665	45741000	45741000	1	0.715	0.0199048	0.00256	2023	1621.73	6270244	7205884	0.4	0.4	0.4	0.193259	1621.73
Uganda	12982097	8583000	20420000	0.164091	0.190665	45741000	45741000	1	0.715	0.0199048	0.00256	2024	1629.64	6270244	7205884	0.4	0.2	0.4	0.279937	1629.64
Uganda	12982097	8583000	20420000	0.164091	0.190665	45741000	45741000	1	0.715	0.0199048	0.00256	2025	1642.23	6270244	7205884	0	0	0.4	0.366614	1642.23
Uganda	12982097	8583000	20420000	0.164091	0.190665	45741000	45741000	1	0.715	0.0199048	0.00256	2026	1653.04	6270244	7205884	0	0	0.4	0.453291	1653.04
Uganda	12982097	8583000	20420000	0.164091	0.190665	45741000	45741000	1	0.715	0.0199048	0.00256	2027	1680.72	6270244	7205884	0	0	0.4	0.539968	1680.72
Uganda	12982097	8583000	20420000	0.164091	0.190665	45741000	45741000	1	0.715	0.0199048	0.00256	2028	1704.34	6270244	7205884	0	0	0.4	0.626646	1704.34
Uganda	12982097	8583000	20420000	0.164091	0.190665	45741000	45741000	1	0.715	0.0199048	0.00256	2029	1727.37	6270244	7205884	0	0	0.4	0.713323	1727.37
Uganda	12982097	8583000	20420000	0.164091	0.190665	45741000	45741000	1	0.715	0.0199048	0.00256	2030	1747.63	6270244	7205884	0	0	0.4	0.8	1747.63
United Republic of Tanzania	7178459	4495000	10890000	0.158174	0.181118	59734214	59734214	1	0.362	0.0200645	0.00344267	2020	1997.82	7865958	8805462			0.4		1997.82
United Republic of Tanzania	7178459	4495000	10890000	0.158174	0.181118	59734214	59734214	1	0.362	0.0200645	0.00344267	2021	2047.75	7865958	8805462	0.4	0.8	0.4	0.0200645	2047.75
United Republic of Tanzania	7178459	4495000	10890000	0.158174	0.181118	59734214	59734214	1	0.362	0.0200645	0.00344267	2022	2083.55	7865958	8805462	0.4	0.6	0.4	0.106724	2083.55
United Republic of Tanzania	7178459	4495000	10890000	0.158174	0.181118	59734214	59734214	1	0.362	0.0200645	0.00344267	2023	2127.21	7865958	8805462	0.4	0.4	0.4	0.193384	2127.21
United Republic of Tanzania	7178459	4495000	10890000	0.158174	0.181118	59734214	59734214	1	0.362	0.0200645	0.00344267	2024	2171.76	7865958	8805462	0.4	0.2	0.4	0.280043	2171.76
United Republic of Tanzania	7178459	4495000	10890000	0.158174	0.181118	59734214	59734214	1	0.362	0.0200645	0.00344267	2025	2217.46	7865958	8805462	0	0	0.4	0.366703	2217.46
United Republic of Tanzania	7178459	4495000	10890000	0.158174	0.181118	59734214	59734214	1	0.362	0.0200645	0.00344267	2026	2267.05	7865958	8805462	0	0	0.4	0.453362	2267.05
United Republic of Tanzania	7178459	4495000	10890000	0.158174	0.181118	59734214	59734214	1	0.362	0.0200645	0.00344267	2027	2312.28	7865958	8805462	0	0	0.4	0.540022	2312.28
United Republic of Tanzania	7178459	4495000	10890000	0.158174	0.181118	59734214	59734214	1	0.362	0.0200645	0.00344267	2028	2360.96	7865958	8805462	0	0	0.4	0.626681	2360.96
United Republic of Tanzania	7178459	4495000	10890000	0.158174	0.181118	59734214	59734214	1	0.362	0.0200645	0.00344267	2029	2410.02	7865958	8805462	0	0	0.4	0.713341	2410.02
United Republic of Tanzania	7178459	4495000	10890000	0.158174	0.181118	59734214	59734214	1	0.362	0.0200645	0.00344267	2030	2459.14	7865958	8805462	0	0	0.4	0.8	2459.14
Zambia	3435936	2199000	5158000	0.14996	0.178988	18383956	18383956	1	0.349	0	0.00256	2020	597.194	2370013	2766913			0.4		597.194
Zambia	3435936	2199000	5158000	0.14996	0.178988	18383956	18383956	1	0.349	0	0.00256	2021	604.045	2370013	2766913	0.4	0.8	0.4	0	604.045
Zambia	3435936	2199000	5158000	0.14996	0.178988	18383956	18383956	1	0.349	0	0.00256	2022	627.418	2370013	2766913	0.4	0.6	0.4	0.0888889	627.418
Zambia	3435936	2199000	5158000	0.14996	0.178988	18383956	18383956	1	0.349	0	0.00256	2023	645.326	2370013	2766913	0.4	0.4	0.4	0.177778	645.326
Zambia	3435936	2199000	5158000	0.14996	0.178988	18383956	18383956	1	0.349	0	0.00256	2024	663.288	2370013	2766913	0.4	0.2	0.4	0.266667	663.288
Zambia	3435936	2199000	5158000	0.14996	0.178988	18383956	18383956	1	0.349	0	0.00256	2025	680.105	2370013	2766913	0	0	0.4	0.355556	680.105
Zambia	3435936	2199000	5158000	0.14996	0.178988	18383956	18383956	1	0.349	0	0.00256	2026	702.845	2370013	2766913	0	0	0.4	0.444444	702.845
Zambia	3435936	2199000	5158000	0.14996	0.178988	18383956	18383956	1	0.349	0	0.00256	2027	707.874	2370013	2766913	0	0	0.4	0.533333	707.874
Zambia	3435936	2199000	5158000	0.14996	0.178988	18383956	18383956	1	0.349	0	0.00256	2028	720.586	2370013	2766913	0	0	0.4	0.622222	720.586
Zambia	3435936	2199000	5158000	0.14996	0.178988	18383956	18383956	1	0.349	0	0.00256	2029	733.058	2370013	2766913	0	0	0.4	0.711111	733.058
Zambia	3435936	2199000	5158000	0.14996	0.178988	18383956	18383956	1	0.349	0	0.00256	2030	745.735	2370013	2766913	0	0	0.4	0.8	745.735
Zimbabwe	1152901	692000	1649000	0.137391	0.170551	14862927	11703470	0.787427	0.01	0.024	0.00256	2020	405.229	1648376	2228408			0.4		319.088
Zimbabwe	1152901	692000	1649000	0.137391	0.170551	14862927	11703470	0.787427	0.01	0.024	0.00256	2021	382.339	1648376	2228408	0.4	0.8	0.4	0.024	301.064
Zimbabwe	1152901	692000	1649000	0.137391	0.170551	14862927	11703470	0.787427	0.01	0.024	0.00256	2022	402.332	1648376	2228408	0.4	0.6	0.4	0.110222	316.807
Zimbabwe	1152901	692000	1649000	0.137391	0.170551	14862927	11703470	0.787427	0.01	0.024	0.00256	2023	406.2	1648376	2228408	0.4	0.4	0.4	0.196444	319.853
Zimbabwe	1152901	692000	1649000	0.137391	0.170551	14862927	11703470	0.787427	0.01	0.024	0.00256	2024	411.416	1648376	2228408	0.4	0.2	0.4	0.282667	323.96
Zimbabwe	1152901	692000	1649000	0.137391	0.170551	14862927	11703470	0.787427	0.01	0.024	0.00256	2025	416.376	1648376	2228408	0	0	0.4	0.368889	327.866
Zimbabwe	1152901	692000	1649000	0.137391	0.170551	14862927	11703470	0.787427	0.01	0.024	0.00256	2026	427.965	1648376	2228408	0	0	0.4	0.455111	336.991
Zimbabwe	1152901	692000	1649000	0.137391	0.170551	14862927	11703470	0.787427	0.01	0.024	0.00256	2027	420.87	1648376	2228408	0	0	0.4	0.541333	331.404
Zimbabwe	1152901	692000	1649000	0.137391	0.170551	14862927	11703470	0.787427	0.01	0.024	0.00256	2028	423.326	1648376	2228408	0	0	0.4	0.627556	333.338
Zimbabwe	1152901	692000	1649000	0.137391	0.170551	14862927	11703470	0.787427	0.01	0.024	0.00256	2029	426.304	1648376	2228408	0	0	0.4	0.713778	335.683
Zimbabwe	1152901	692000	1649000	0.137391	0.170551	14862927	11703470	0.787427	0.01	0.024	0.00256	2030	430.112	1648376	2228408	0	0	0.4	0.8	338.682

## Sheet: Code Book
Variable Name	Definition	Source	Link
country	Country	Global Health Observatory	﻿https://apps.who.int/gho/data/view.main.MALARIAINCIDENCEv?lang=en
malaria_prev	﻿Estimated number of malaria cases 2020	Global Health Observatory	﻿https://apps.who.int/gho/data/view.main.MALARIAINCIDENCEv?lang=en
1_4prop	Proportion of cases occurring among children 1-4 years old	Institutes of Health Metrics & Evaluation	﻿https://vizhub.healthdata.org/gbd-results/
5_9prop	Proportion of cases occurring among children 5-9 years old	Institutes of Health Metrics & Evaluation	﻿https://vizhub.healthdata.org/gbd-results/
pop_total	Country's total population	World Malaria Report 2021	https://www.who.int/teams/global-malaria-programme/reports/world-malaria-report-2021
pop_atrisk	Number of people in country living in malaria endemic area	World Malaria Report 2021	https://www.who.int/teams/global-malaria-programme/reports/world-malaria-report-2021
at_risk	Proportion of country's population living in malaria endemic area	World Malaria Report 2021	https://www.who.int/teams/global-malaria-programme/reports/world-malaria-report-2021
trr	Treatment received rate. Percentage of children under age five who were ill with fever in the last two weeks and received any appropriate (locally defined) anti-malarial drugs	The World Bank	https://data.worldbank.org/indicator/SH.MLR.TRET.ZS
tfr	Treatment failure rate. Proportion of cases for which treatment fails. Estimated using ACT treatment failure rates from studies of P. falciparum occurring in African countries	Malaria Threat's Map	from: https://apps.who.int/malaria/maps/threats/
CFR_malaria	Proportion of cases that will result in death	World Malaria Report 2021; Global Health Observatory	https://www.who.int/publications/i/item/9789240040496	https://apps.who.int/gho/data/node.main.A1368?lang=en	https://apps.who.int/gho/data/node.main.A1372?lang=en
year	Year
1	Estimated number of one-year-olds in year X	World Population Prospects 2019	https://population.un.org/wpp/Download/Standard/Population/
Pop1_4	Estimated number of 1-4-year-olds in year X	World Population Prospects 2019	https://population.un.org/wpp/Download/Standard/Population/
Pop5_9	Estimated number of 5-9-year-olds in year X	World Population Prospects 2019	https://population.un.org/wpp/Download/Standard/Population/
inc_byage	Annual number of new cases per 1,000 population by age group
VE1	Vaccine efficacy (VE) in year X for Scenario 1: VE is constant at 40% for four years dropping to 0% in year five
VE2	Vaccine efficacy (VE) in year X for Scenario 2: VE begins at 80% and drops 20 percentage points per year
VE3	Vaccine efficacy (VE) in year X for Scenario 3: VE is constant at 40% for entire study period
tfr_increasing	Treatment failure rate in year X in scenario of increasing resistance (TFRs reach 80% by year 2030)
Pop1	Number of one-year-olds in malaria endemic areas eligible for a vaccine
