# Supplementary material for: Malaria Vaccine Impact on Cases, Drug-resistant Cases, and Deaths in Africa: A Modeling Study
Source: Research Square preprint supplement (doi:10.21203/rs.3.rs-2362054/v1), 2022-12-19
Supplement: Supplementary file 2 [file c0a623b0efdb54ea57a446ec.docx]

Supplement

**Malaria Vaccine Impact on Cases, Drug-resistant Cases, and Deaths in Africa: A Modeling Study**

Alisa Hamilton, MS1

Fardad Haghpanah, PhD1

Mateusz Hasso-Agopsowicz, PhD2

Isabel Frost, DPhil2,3

Gary Lin, PhD1

Emily Schueller, MA1

Eili Klein, PhD1,4

Ramanan Laxminarayan, PhD1,5,6

# 1 One Health Trust, Washington, DC, USA & New Delhi, India

2 World Health Organization, Geneva, Switzerland

3 Imperial College London, London, UK

4 Johns Hopkins University, Department of Emergency Medicine, Maryland, USA

5 Princeton University, New Jersey, USA

6 University of Washington, Washington, USA

**Corresponding Author:**

Ramanan Laxminarayan

One Health Trust

Washington, DC, USA

New Delhi, India

[ramanan@cddep.org](mailto:ramanan@cddep.org)

**Table 1. Malaria Model Parameters**

| **Parameter** | **Symbol** | **Definition** | **Value (Range)** | **Source** |
| --- | --- | --- | --- | --- |
| Target population | TP | Estimated number of children 1 years old | Country-specific (±10%) for each year 2021-2030 | World Population Prospects 2019 (1) |
| Population by age group | W | Estimated number of children 1-4 years old | Country-specific for each year 2021-2030 | World Population Prospects 2019 (1) |
| Estimated number of children 5-9 years old |
| Prevalence | G | ﻿Estimated number of malaria cases among all ages | Country-specific | Global Health Observatory (2) |
| Prevalence of cases by age group | H | Prevalence of cases occurring among children 1-4 years old | Country Specific (Supplementary Equations 1) | Institutes of Health Metrics & Evaluation (3) |
| Prevalence of cases occurring among children 5-9 years old |
| Prevalence of cases occurring among all ages |
| At-Risk | k | Proportion of a country’s population considered at-risk in malaria endemic countries | Country-specific | World Malaria Report (4) |
| Coverage | c | Proportion of one-year-olds receiving a vaccine | 70% | WHO expert consultation |
| Efficacy | e | Proportion of vaccinated children protected from disease | Scenario 1: 40% (years 1-4), 0% (years 5+) | WHO expert consultation |
| Scenario 2: 80% (year 1), 60% (year 2), 40% (year 3), 20% (year 4), 0% (years 5+) |
| Scenario 3: 40% all years |
| Treatment received rate | r | Percentage of children under age five who were ill with fever in the last two weeks and received any appropriate (locally defined) anti-malarial drugs | Country-specific (±20%) | The World Bank (5): UNICEF, State of the World's Children, Childinfo, and Demographic and Health Surveys. |
| Treatment failure rate | f | Proportion of cases for which treatment fails. Estimated using ACT treatment failure rates from studies of *P. falciparum* occurring in African countries | Country-specific (±20%) | Malaria Threats Map (6) |
| Case fatality rate | m | Proportion of cases that will result in death | 0.256% (±20%) for low-transmission countries | World Malaria Report (4)  Global Health Observatory (7,8) |
| Estimated total deaths/estimated total cases (±20%) for high-transmission countries. Country-specific |

Table 2. ACT Drug Names and Abbreviations

| ACT Drug Name | Abbreviation |
| --- | --- |
| Artemether-lumefantrine | AL |
| Artesunate + sulfadoxine-pyrimethamine | AS+SP |
| Artesunate-amodiaquine | AS-AQ |
| Artesunate-melfloquine | AS-MQ |
| Artesunate-pyronaridine | AS-PY |
| Dihydroartemisinin-piperaquine | DHA-PPQ |

Table 3. Multivariate Regression Results for Treatment Received Rate (TRR) and Treatment Failure Rate (TFR) by GDP per Capita and Under 5 Mortality per 1,000

|  | **Mean (SD)** | **95% Confidence Interval** |
| --- | --- | --- |
| Correlation between TRR and TFR | 0.282 (0.141) | (0.020–0.539) |
| TRR Intercept | -0.003 (0.152) | (-0.283–0.287) |
| TFR Intercept | 0.031 (0.123) | (-0.202–0.254) |
| Slope of GDP per Capita on TRR | -0.212 (0.162) | (-0.513–0.100) |
| Slope of GDP per Capita on TFR | -0.100 (0.178) | (-0.427–0.234) |
| Slope of Under 5 Mortality on TRR | 0.334 (0.156) | (0.036–0.616) |
| Slope of Under 5 Mortality on TFR | -0.053 (0.166) | (-0.368–0.255) |
| Interaction of GDP per Capita and Under 5 Mortality on TRR | 0.057 (0.165) | (-0.251–0.368) |
| Interaction of GDP per Capita and Under 5 Mortality on TFR | 0.230 (0.185) | (-0.107–0.581) |
| Residual Standard Error for TRR | 0.947 (0.113) | (0.753–1.162) |
| Residual Standard Error for TFR | 0.985 (0.081) | (0.844–1.145) |
| GDP per Capita was logged and standardized |  |  |
| All values are on the same scale as standardized variables | | |

**Table 4. Country-specific Parameters for Malaria**

| Country | Proportion At-Risk | Incidence Rate  (Ages 1–4) | Incidence Rate  (Ages 5–10) | Treatment Received Rate | Treatment Failure Rate | Case Fatality Rate |
| --- | --- | --- | --- | --- | --- | --- |
| Angola | 1.00 | 0.2902 (0.1922–0.4202) | 0.3161 (0.2095–0.4574) | 0.1810 | 0.0373 | 0.0029 |
| Beninc | 1.00 | 0.5153 (0.3639–0.7103) | 0.5193 (0.3668–0.7157) | 0.1750 | 0.0112 | 0.0026a |
| Botswana | 0.66 | 0.0007 (0.0001–0.0011) | 0.0008 (0.0005–0.0013) | 0.1223 | 0.0125 | 0.0026b |
| Burkina Fasoc | 1.00 | 0.4942 (0.3027–0.7532) | 0.4928 (0.3033–0.7506) | 0.5110 | 0.0878 | 0.0035 |
| Burundi | 1.00 | 0.3549 (0.2155–0.5510) | 0.3526 (0.2142–0.5473) | 0.4700 | 0.0646 | 0.0026 |
| Cameroonc | 1.00 | 0.2954 (0.1923–0.4337) | 0.3222 (0.2101–0.4727) | 0.3820 | 0.0447 | 0.0026a |
| Central African Republic | 1.00 | 0.4208 (0.2141–0.7531) | 0.4062 (0.2075–0.7263) | 0.3410 | 0.0145 | 0.0027 |
| Chadc | 0.99 | 0.2675 (0.1459–0.4539) | 0.2665 (0.1365–0.4523) | 0.2690 | 0.0045 | 0.0031 |
| Comoros | 1.00 | 0.0051 (0.0028–0.0062) | 0.0056 (0.0039–0.0068) | 0.2670 | 0.0042 | 0.0026b |
| Congo | 1.00 | 0.2373 (0.1444–0.3688) | 0.2514 (0.1538–0.3906) | 0.2500 | 0.0142 | 0.0026a |
| Côte d'Ivoire | 1.00 | 0.3413 (0.3409–0.1844) | 0.3569 (0.3567–0.1927) | 0.1750 | 0.0072 | 0.0028 |
| Democratic Republic of the Congo | 1.00 | 0.3448 (0.2641–0.4418) | 0.3795 (0.2909–0.4861) | 0.2920 | 0.0123 | 0.0026a |
| Equatorial Guinea | 1.00 | 0.2678 (0.1502–0.4386) | 0.3192 (0.1793–0.5226) | 0.3320 | 0.0264 | 0.0026a |
| Eritrea | 1.00 | 0.0712 (0.0440–0.1010) | 0.0756 (0.0480–0.1064) | 0.0150 | 0.0306 | 0.0026b |
| Eswatini | 0.28 | 0.0002 (0.0000–0.0003) | 0.0002 (0.0002–0.0003) | 0.0170 | 0.0161 | 0.0026b |
| Ethiopia | 0.68 | 0.0521 (0.0285–0.0766) | 0.0542 (0.0297–0.0790) | 0.0770 | 0.0165 | 0.0026b |
| Gabon | 1.00 | 0.2186 (0.1170–0.3734) | 0.2425 (0.1304–0.4139) | 0.2590 | 0.0280 | 0.0026a |
| Gambiac | 1.00 | 0.0896 (0.0578–0.1299) | 0.1000 (0.0678–0.1435) | 0.0670 | 0.0168 | 0.0057 |
| Ghanac | 1.00 | 0.1911 (0.1307–0.2680) | 0.1990 (0.1362–0.2789) | 0.5010 | 0.0220 | 0.0026a |
| Guineac | 1.00 | 0.4039 (0.2451–0.6281) | 0.4230 (0.2568–0.6577) | 0.2480 | 0.0217 | 0.0026a |
| Guinea-Bissauc | 1.00 | 0.1132 (0.0312–0.2837) | 0.1085 (0.0258–0.2996) | 0.2800 | 0.0250 | 0.0064 |
| Kenya | 1.00 | 0.0664 (0.0390–0.1101) | 0.0684 (0.0391–0.1128) | 0.2710 | 0.0332 | 0.0035 |
| Liberia | 1.00 | 0.3995 (0.2358–0.6315) | 0.4421 (0.2611–0.6987) | 0.6550 | 0.0306 | 0.0026 |
| Madagascar | 1.00 | 0.1673 (0.1272–0.2107) | 0.1808 (0.1376–0.2272) | 0.1010 | 0.0077 | 0.0026b |
| Malawi | 1.00 | 0.2538 (0.1366–0.4301) | 0.2883 (0.1552–0.4884) | 0.2940 | 0.0343 | 0.0026a |
| Malic | 1.00 | 0.4340 (0.2971–0.6179) | 0.4306 (0.2994–0.6126) | 0.1870 | 0.0086 | 0.0026a |
| Mauritaniac | 1.00 | 0.0329 (0.0123–0.0594) | 0.0388 (0.0151–0.0697) | 0.1970 | 0.0180 | 0.0060 |
| Mozambique | 1.00 | 0.3976 (0.2862–0.5337) | 0.4263 (0.3070–0.5722) | 0.3270 | 0.0153 | 0.0026a |
| Namibia | 0.79 | 0.0094 (0.0063–0.0117) | 0.0096 (0.0071–0.0118) | 0.0840 | 0.0141 | 0.0026b |
| Nigerc | 1.00 | 0.3893 (0.1884–0.7285) | 0.3975 (0.1926–0.7435) | 0.1920 | 0.0212 | 0.0026a |
| Nigeriac | 1.00 | 0.3575 (0.2540–0.4979) | 0.3858 (0.2766–0.5310) | 0.4350 | 0.0125 | 0.0026a |
| Rwanda | 1.00 | 0.2532 (0.1846–0.3263) | 0.2886 (0.2112–0.3716) | 0.1960 | 0.0316 | 0.0026a |
| Sao Tome and Principe | 1.00 | 0.0083 (0.0061–0.0101) | 0.0098 (0.0076–0.0118) | 0.0140 | 0.0000 | 0.0026a |
| Senegalc | 1.00 | 0.0544 (0.0342–0.0751) | 0.0579 (0.0385–0.0791) | 0.0470 | 0.0045 | 0.0044 |
| Sierra Leone | 1.00 | 0.4074 (0.2166–0.6929) | 0.4129 (0.2197–0.7023) | 0.5700 | 0.0029 | 0.0061 |
| South Africa | 0.10 | 0.0001 (0.0000–0.0001) | 0.0001 (0.0001–0.0001) | 0.0050 | 0.0091 | 0.0122 |
| South Sudan | 1.00 | 0.3652 (0.1974–0.6157) | 0.3750 (0.2039–0.6325) | 0.3190 | 0.0197 | 0.0034 |
| Togoc | 1.00 | 0.2700 (0.1835–0.3794) | 0.2903 (0.1973–0.4079) | 0.3110 | 0.0158 | 0.0026a |
| Uganda | 1.00 | 0.3397 (0.2246–0.5345) | 0.3435 (0.2271–0.5404) | 0.7150 | 0.0199 | 0.0026a |
| United Republic of Tanzania | 1.00 | 0.1443 (0.0903–0.2191) | 0.1477 (0.0925–0.2241) | 0.3620 | 0.0201 | 0.0034 |
| Zambia | 1.00 | 0.2174 (0.1388–0.3267) | 0.2223 (0.1421–0.3338) | 0.3490 | 0.0000 | 0.0026a |
| Zimbabwe | 0.79 | 0.0961 (0.0540–0.1390) | 0.0882 (0.0517–0.1267) | 0.0100 | 0.0240 | 0.0026b |

a Assigned the same CFR as WHO low-transmission countries if estimated total deaths divided by estimated total cases was less than 0.00256 (Benin, Cameroon, Congo, Democratic Republic of the Congo, Equatorial Guinea, Gabon, Ghana, Guinea, Malawi, Mali, Mozambique, Niger, Nigeria, Rwanda, Sao Tome and Principe, Togo, Uganda, Zambia).

b Low-transmission countries assigned a CFR of 0.256% according to WHO methodology (Botswana, Comoros, Eritrea, Eswatini, Ethiopia, Madagascar, Namibia, Zimbabwe).

c 13 Sahel countries (including Sudan) in which pediatric chemoprevention has been implemented.

Table 5. Cases, Resistant Cases, and Deaths Averted Under the Baseline Scenario

| Baseline Scenario: No vaccine. | | | |
| --- | --- | --- | --- |
| Country | **Baseline Cases (Uncertainty Interval)** | **Baseline Resistant Cases (UI)** | **Baseline Deaths (UI)** |
| Angola | 21,573,000 (17,456,000-28,294,000) | 145,000 (99,000-229,000) | 62,000 (44,000-85,000) |
| Benin | 11,933,000 (9,727,000-14,855,000) | 23,000 (15,000-34,000) | 31,000 (23,000-42,000) |
| Botswana | 1,000 (1,000-2,000) | 0 (0-0) | 0 (0-0) |
| Burkina Faso | 20,724,000 (16,710,000-28,000,000) | 930,000 (626,000-1,477,000) | 73,000 (52,000-104,000) |
| Burundi | 8,675,000 (6,998,000-11,727,000) | 263,000 (177,000-428,000) | 22,000 (16,000-33,000) |
| Cameroon | 14,896,000 (12,016,000-19,331,000) | 254,000 (164,000-384,000) | 38,000 (28,000-53,000) |
| Central African Republic | 3,673,000 (2,886,000-5,662,000) | 18,000 (12,000-32,000) | 10,000 (7,000-16,000) |
| Chad | 9,446,000 (7,220,000-13,611,000) | 11,000 (7,000-20,000) | 30,000 (20,000-47,000) |
| Comoros | 8,000 (6,000-9,000) | 0 (0-0) | 0 (0-0) |
| Congo | 2,363,000 (1,884,000-3,187,000) | 8,000 (5,000-13,000) | 6,000 (5,000-9,000) |
| Côte d'Ivoire | 17,331,000 (11,655,000-18,133,000) | 22,000 (11,000-28,000) | 49,000 (31,000-58,000) |
| Democratic Republic of the Congo | 69,099,000 (58,620,000-82,878,000) | 247,000 (162,000-362,000) | 177,000 (131,000-239,000) |
| Equatorial Guinea | 705,000 (551,000-979,000) | 6,000 (4,000-10,000) | 2,000 (1,000-3,000) |
| Eritrea | 408,000 (326,000-512,000) | 0 (0-0) | 1,000 (1,000-1,000) |
| Eswatini | 0 (0-0) | 0 (0-0) | 0 (0-0) |
| Ethiopia | 7,069,000 (5,449,000-9,094,000) | 9,000 (5,000-14,000) | 18,000 (12,000-25,000) |
| Gabon | 807,000 (619,000-1,141,000) | 6,000 (4,000-10,000) | 2,000 (1,000-3,000) |
| Gambia | 462,000 (389,000-584,000) | 1,000 (0-1,000) | 3,000 (2,000-4,000) |
| Ghana | 9,326,000 (7,701,000-11,916,000) | 103,000 (68,000-156,000) | 24,000 (17,000-34,000) |
| Guinea | 10,419,000 (8,405,000-14,159,000) | 56,000 (39,000-95,000) | 27,000 (19,000-39,000) |
| Guinea-Bissau | 394,000 (298,000-832,000) | 3,000 (2,000-6,000) | 3,000 (2,000-5,000) |
| Kenya | 5,546,000 (4,398,000-7,795,000) | 50,000 (31,000-86,000) | 20,000 (14,000-30,000) |
| Liberia | 3,675,000 (2,911,000-4,854,000) | 74,000 (45,000-115,000) | 9,000 (7,000-14,000) |
| Madagascar | 8,591,000 (7,214,000-10,360,000) | 7,000 (4,000-10,000) | 22,000 (16,000-30,000) |
| Malawi | 9,520,000 (7,504,000-13,517,000) | 96,000 (63,000-159,000) | 24,000 (17,000-39,000) |
| Mali | 19,143,000 (15,849,000-24,601,000) | 31,000 (21,000-47,000) | 49,000 (36,000-74,000) |
| Mauritania | 289,000 (199,000-449,000) | 1,000 (1,000-2,000) | 2,000 (1,000-3,000) |
| Mozambique | 25,745,000 (21,173,000-32,125,000) | 128,000 (81,000-183,000) | 66,000 (48,000-91,000) |
| Namibia | 28,000 (24,000-33,000) | 0 (0-0) | 0 (0-0) |
| Niger | 24,184,000 (18,223,000-38,553,000) | 98,000 (55,000-184,000) | 62,000 (44,000-104,000) |
| Nigeria | 149,851,000 (122,020,000-186,516,000) | 813,000 (532,000-1,272,000) | 384,000 (287,000-521,000) |
| Rwanda | 5,773,000 (4,770,000-6,996,000) | 36,000 (24,000-54,000) | 15,000 (11,000-21,000) |
| Sao Tome and Principe | 3,000 (3,000-4,000) | 0 (0-0) | 0 (0-0) |
| Senegal | 1,715,000 (1,374,000-2,096,000) | 0 (0-1,000) | 8,000 (6,000-10,000) |
| Sierra Leone | 5,420,000 (4,341,000-7,583,000) | 9,000 (6,000-15,000) | 33,000 (23,000-52,000) |
| South Africa | 1,000 (1,000-1,000) | 0 (0-0) | 0 (0-0) |
| South Sudan | 7,413,000 (5,855,000-10,672,000) | 47,000 (31,000-81,000) | 25,000 (18,000-39,000) |
| Togo | 4,030,000 (3,287,000-5,185,000) | 20,000 (13,000-31,000) | 10,000 (8,000-14,000) |
| Uganda | 30,704,000 (25,838,000-41,366,000) | 437,000 (303,000-756,000) | 79,000 (59,000-118,000) |
| United Republic of Tanzania | 17,413,000 (13,922,000-23,049,000) | 126,000 (85,000-200,000) | 60,000 (42,000-86,000) |
| Zambia | 7,949,000 (6,470,000-10,302,000) | 0 (0-0) | 20,000 (15,000-29,000) |
| Zimbabwe | 1,646,000 (1,275,000-2,077,000) | 0 (0-1,000) | 4,000 (3,000-6,000) |
| Total | 537,950,000 (435,568,000-693,039,000) | 4,080,000 (2,695,000-6,494,000) | 1,468,000 (1,065,000-2,081,000) |

Table 6. Cases, Resistant Cases, and Deaths Averted Under Scenario 1

| Scenario 1: VE constant at 40% and drops to 0% in year 5 | | | |
| --- | --- | --- | --- |
| Country | **Cases Averted (UI)** | **Resistant Cases Averted (UI)** | **Deaths Averted (UI)** |
| Angola | 3,693,000 (3,059,000-4,952,000) | 25,000 (17,000-40,000) | 11,000 (8,000-14,000) |
| Benin | 2,092,000 (1,743,000-2,590,000) | 4,000 (3,000-6,000) | 5,000 (4,000-7,000) |
| Botswana | 0 (0-0) | 0 (0-0) | 0 (0-0) |
| Burkina Faso | 3,648,000 (2,980,000-5,036,000) | 164,000 (112,000-256,000) | 13,000 (9,000-18,000) |
| Burundi | 1,526,000 (1,266,000-2,080,000) | 46,000 (31,000-78,000) | 4,000 (3,000-6,000) |
| Cameroon | 2,525,000 (2,000,000-3,306,000) | 43,000 (27,000-66,000) | 6,000 (5,000-9,000) |
| Central African Republic | 654,000 (502,000-1,069,000) | 3,000 (2,000-6,000) | 2,000 (1,000-3,000) |
| Chad | 1,661,000 (1,205,000-2,399,000) | 2,000 (1,000-3,000) | 5,000 (3,000-9,000) |
| Comoros | 1,000 (1,000-1,000) | 0 (0-0) | 0 (0-0) |
| Congo | 407,000 (313,000-582,000) | 1,000 (1,000-2,000) | 1,000 (1,000-2,000) |
| Côte d'Ivoire | 2,991,000 (2,022,000-3,102,000) | 4,000 (2,000-5,000) | 8,000 (5,000-10,000) |
| Democratic Republic of the Congo | 11,717,000 (9,901,000-14,284,000) | 42,000 (27,000-62,000) | 30,000 (22,000-41,000) |
| Equatorial Guinea | 116,000 (89,000-158,000) | 1,000 (1,000-2,000) | 0 (0-0) |
| Eritrea | 69,000 (56,000-86,000) | 0 (0-0) | 0 (0-0) |
| Eswatini | 0 (0-0) | 0 (0-0) | 0 (0-0) |
| Ethiopia | 1,214,000 (954,000-1,597,000) | 2,000 (1,000-2,000) | 3,000 (2,000-4,000) |
| Gabon | 134,000 (102,000-193,000) | 1,000 (1,000-2,000) | 0 (0-1,000) |
| Gambia | 78,000 (66,000-98,000) | 0 (0-0) | 0 (0-1,000) |
| Ghana | 1,603,000 (1,338,000-2,121,000) | 18,000 (11,000-27,000) | 4,000 (3,000-6,000) |
| Guinea | 1,796,000 (1,468,000-2,418,000) | 10,000 (7,000-16,000) | 5,000 (3,000-7,000) |
| Guinea-Bissau | 70,000 (51,000-144,000) | 0 (0-1,000) | 0 (0-1,000) |
| Kenya | 961,000 (741,000-1,392,000) | 9,000 (5,000-16,000) | 3,000 (2,000-5,000) |
| Liberia | 620,000 (511,000-825,000) | 12,000 (7,000-20,000) | 2,000 (1,000-2,000) |
| Madagascar | 1,463,000 (1,232,000-1,764,000) | 1,000 (1,000-2,000) | 4,000 (3,000-5,000) |
| Malawi | 1,597,000 (1,265,000-2,193,000) | 16,000 (11,000-28,000) | 4,000 (3,000-7,000) |
| Mali | 3,381,000 (2,690,000-4,346,000) | 5,000 (4,000-9,000) | 9,000 (6,000-14,000) |
| Mauritania | 47,000 (33,000-78,000) | 0 (0-0) | 0 (0-0) |
| Mozambique | 4,410,000 (3,534,000-5,457,000) | 22,000 (14,000-30,000) | 11,000 (8,000-16,000) |
| Namibia | 5,000 (4,000-6,000) | 0 (0-0) | 0 (0-0) |
| Niger | 4,260,000 (3,064,000-7,122,000) | 17,000 (9,000-37,000) | 11,000 (8,000-18,000) |
| Nigeria | 25,554,000 (19,758,000-31,430,000) | 139,000 (94,000-221,000) | 65,000 (49,000-89,000) |
| Rwanda | 950,000 (768,000-1,158,000) | 6,000 (4,000-9,000) | 2,000 (2,000-3,000) |
| Sao Tome and Principe | 1,000 (0-1,000) | 0 (0-0) | 0 (0-0) |
| Senegal | 294,000 (232,000-357,000) | 0 (0-0) | 1,000 (1,000-2,000) |
| Sierra Leone | 938,000 (767,000-1,268,000) | 2,000 (1,000-3,000) | 6,000 (4,000-9,000) |
| South Africa | 0 (0-0) | 0 (0-0) | 0 (0-0) |
| South Sudan | 1,286,000 (1,004,000-1,966,000) | 8,000 (5,000-15,000) | 4,000 (3,000-7,000) |
| Togo | 688,000 (555,000-880,000) | 3,000 (2,000-5,000) | 2,000 (1,000-2,000) |
| Uganda | 5,333,000 (4,467,000-7,196,000) | 76,000 (52,000-131,000) | 14,000 (10,000-19,000) |
| United Republic of Tanzania | 3,041,000 (2,386,000-4,071,000) | 22,000 (15,000-36,000) | 10,000 (7,000-15,000) |
| Zambia | 1,393,000 (1,149,000-1,807,000) | 0 (0-0) | 4,000 (3,000-5,000) |
| Zimbabwe | 297,000 (221,000-376,000) | 0 (0-0) | 1,000 (1,000-1,000) |
| Total | 92,512,000 (73,497,000-119,909,000) | 705,000 (465,000-1,135,000) | 253,000 (182,000-360,000) |

Table 7. Cases, Resistant Cases, and Deaths Averted by Country Under Scenario 2

| Scenario 2: VE begins at 80% and drops 20 percentage points per year until reaching 0% in year 5 | | | |
| --- | --- | --- | --- |
| Country | **Cases Averted (UI)** | **Resistant Cases Averted (UI)** | **Deaths Averted (UI)** |
| Angola | 4,916,000 (4,064,000-6,785,000) | 33,000 (23,000-55,000) | 14,000 (10,000-19,000) |
| Benin | 2,780,000 (2,340,000-3,423,000) | 5,000 (4,000-8,000) | 7,000 (5,000-10,000) |
| Botswana | 0 (0-0) | 0 (0-0) | 0 (0-0) |
| Burkina Faso | 4,848,000 (3,978,000-6,690,000) | 218,000 (151,000-340,000) | 17,000 (12,000-24,000) |
| Burundi | 2,027,000 (1,670,000-2,712,000) | 62,000 (42,000-103,000) | 5,000 (4,000-7,000) |
| Cameroon | 3,352,000 (2,672,000-4,427,000) | 57,000 (37,000-89,000) | 9,000 (7,000-12,000) |
| Central African Republic | 869,000 (662,000-1,426,000) | 4,000 (3,000-8,000) | 2,000 (2,000-4,000) |
| Chad | 2,207,000 (1,565,000-3,213,000) | 3,000 (1,000-5,000) | 7,000 (4,000-11,000) |
| Comoros | 2,000 (1,000-2,000) | 0 (0-0) | 0 (0-0) |
| Congo | 541,000 (416,000-774,000) | 2,000 (1,000-3,000) | 1,000 (1,000-2,000) |
| Côte d'Ivoire | 3,974,000 (2,635,000-4,087,000) | 5,000 (3,000-6,000) | 11,000 (7,000-14,000) |
| Democratic Republic of the Congo | 15,577,000 (13,250,000-18,857,000) | 56,000 (36,000-82,000) | 40,000 (29,000-53,000) |
| Equatorial Guinea | 154,000 (113,000-207,000) | 1,000 (1,000-2,000) | 0 (0-1,000) |
| Eritrea | 92,000 (77,000-113,000) | 0 (0-0) | 0 (0-0) |
| Eswatini | 0 (0-0) | 0 (0-0) | 0 (0-0) |
| Ethiopia | 1,610,000 (1,262,000-2,073,000) | 2,000 (1,000-3,000) | 4,000 (3,000-6,000) |
| Gabon | 177,000 (136,000-251,000) | 1,000 (1,000-2,000) | 0 (0-1,000) |
| Gambia | 103,000 (87,000-130,000) | 0 (0-0) | 1,000 (0-1,000) |
| Ghana | 2,126,000 (1,770,000-2,818,000) | 23,000 (15,000-34,000) | 5,000 (4,000-8,000) |
| Guinea | 2,385,000 (1,991,000-3,199,000) | 13,000 (9,000-21,000) | 6,000 (4,000-9,000) |
| Guinea-Bissau | 93,000 (68,000-191,000) | 1,000 (0-1,000) | 1,000 (0-1,000) |
| Kenya | 1,276,000 (1,029,000-1,890,000) | 11,000 (7,000-22,000) | 5,000 (3,000-7,000) |
| Liberia | 823,000 (673,000-1,082,000) | 17,000 (9,000-26,000) | 2,000 (2,000-3,000) |
| Madagascar | 1,943,000 (1,632,000-2,338,000) | 2,000 (1,000-2,000) | 5,000 (4,000-7,000) |
| Malawi | 2,122,000 (1,706,000-2,948,000) | 21,000 (15,000-36,000) | 5,000 (4,000-9,000) |
| Mali | 4,496,000 (3,633,000-5,758,000) | 7,000 (5,000-11,000) | 12,000 (8,000-18,000) |
| Mauritania | 63,000 (43,000-104,000) | 0 (0-0) | 0 (0-1,000) |
| Mozambique | 5,862,000 (4,664,000-7,284,000) | 29,000 (18,000-42,000) | 15,000 (11,000-20,000) |
| Namibia | 6,000 (5,000-8,000) | 0 (0-0) | 0 (0-0) |
| Niger | 5,677,000 (3,957,000-9,240,000) | 23,000 (11,000-49,000) | 15,000 (11,000-24,000) |
| Nigeria | 33,950,000 (26,535,000-41,699,000) | 184,000 (128,000-301,000) | 87,000 (63,000-116,000) |
| Rwanda | 1,259,000 (1,017,000-1,502,000) | 8,000 (5,000-12,000) | 3,000 (2,000-4,000) |
| Sao Tome and Principe | 1,000 (1,000-1,000) | 0 (0-0) | 0 (0-0) |
| Senegal | 390,000 (302,000-471,000) | 0 (0-0) | 2,000 (1,000-2,000) |
| Sierra Leone | 1,243,000 (1,024,000-1,730,000) | 2,000 (1,000-3,000) | 8,000 (5,000-12,000) |
| South Africa | 0 (0-0) | 0 (0-0) | 0 (0-0) |
| South Sudan | 1,706,000 (1,366,000-2,549,000) | 11,000 (6,000-19,000) | 6,000 (4,000-9,000) |
| Togo | 913,000 (731,000-1,155,000) | 4,000 (3,000-7,000) | 2,000 (2,000-3,000) |
| Uganda | 7,076,000 (6,040,000-9,551,000) | 101,000 (69,000-174,000) | 18,000 (13,000-27,000) |
| United Republic of Tanzania | 4,045,000 (3,209,000-5,363,000) | 29,000 (19,000-47,000) | 14,000 (10,000-20,000) |
| Zambia | 1,853,000 (1,516,000-2,390,000) | 0 (0-0) | 5,000 (3,000-7,000) |
| Zimbabwe | 394,000 (296,000-485,000) | 0 (0-0) | 1,000 (1,000-1,000) |
| Total | 122,930,000 (98,137,000-158,928,000) | 937,000 (626,000-1,516,000) | 336,000 (241,000-474,000) |

Table 8. Cases, Resistant Cases, and Deaths Averted by Country Under Scenario 3

| Scenario 3: VE constant at 40% for the entire study period | | | |
| --- | --- | --- | --- |
| Country | **Cases Averted (UI)** | **Resistant Cases Averted (UI)** | **Deaths Averted (UI)** |
| Angola | 6,044,000 (4,890,000-7,928,000) | 41,000 (28,000-64,000) | 17,000 (12,000-24,000) |
| Benin | 3,344,000 (2,726,000-4,163,000) | 7,000 (4,000-10,000) | 9,000 (6,000-12,000) |
| Botswana | 0 (0-1,000) | 0 (0-0) | 0 (0-0) |
| Burkina Faso | 5,809,000 (4,683,000-7,849,000) | 261,000 (175,000-414,000) | 20,000 (14,000-29,000) |
| Burundi | 2,430,000 (1,960,000-3,286,000) | 74,000 (50,000-120,000) | 6,000 (5,000-9,000) |
| Cameroon | 4,173,000 (3,366,000-5,416,000) | 71,000 (46,000-108,000) | 11,000 (8,000-15,000) |
| Central African Republic | 1,029,000 (808,000-1,587,000) | 5,000 (3,000-9,000) | 3,000 (2,000-4,000) |
| Chad | 2,646,000 (2,022,000-3,814,000) | 3,000 (2,000-5,000) | 8,000 (6,000-13,000) |
| Comoros | 2,000 (2,000-2,000) | 0 (0-0) | 0 (0-0) |
| Congo | 662,000 (528,000-893,000) | 2,000 (2,000-4,000) | 2,000 (1,000-3,000) |
| Côte d'Ivoire | 4,856,000 (3,265,000-5,080,000) | 6,000 (3,000-8,000) | 14,000 (9,000-16,000) |
| Democratic Republic of the Congo | 19,359,000 (16,424,000-23,220,000) | 69,000 (45,000-101,000) | 50,000 (37,000-67,000) |
| Equatorial Guinea | 198,000 (154,000-274,000) | 2,000 (1,000-3,000) | 1,000 (0-1,000) |
| Eritrea | 114,000 (91,000-143,000) | 0 (0-0) | 0 (0-0) |
| Eswatini | 0 (0-0) | 0 (0-0) | 0 (0-0) |
| Ethiopia | 1,979,000 (1,526,000-2,547,000) | 3,000 (2,000-4,000) | 5,000 (3,000-7,000) |
| Gabon | 226,000 (173,000-320,000) | 2,000 (1,000-3,000) | 1,000 (0-1,000) |
| Gambia | 129,000 (109,000-164,000) | 0 (0-0) | 1,000 (1,000-1,000) |
| Ghana | 2,612,000 (2,157,000-3,338,000) | 29,000 (19,000-44,000) | 7,000 (5,000-9,000) |
| Guinea | 2,919,000 (2,355,000-3,968,000) | 16,000 (11,000-27,000) | 7,000 (5,000-11,000) |
| Guinea-Bissau | 110,000 (84,000-233,000) | 1,000 (1,000-2,000) | 1,000 (1,000-2,000) |
| Kenya | 1,553,000 (1,232,000-2,183,000) | 14,000 (9,000-24,000) | 6,000 (4,000-8,000) |
| Liberia | 1,030,000 (816,000-1,360,000) | 21,000 (12,000-32,000) | 3,000 (2,000-4,000) |
| Madagascar | 2,406,000 (2,020,000-2,902,000) | 2,000 (1,000-3,000) | 6,000 (4,000-8,000) |
| Malawi | 2,667,000 (2,102,000-3,787,000) | 27,000 (18,000-45,000) | 7,000 (5,000-11,000) |
| Mali | 5,364,000 (4,441,000-6,894,000) | 9,000 (6,000-13,000) | 14,000 (10,000-21,000) |
| Mauritania | 81,000 (56,000-126,000) | 0 (0-1,000) | 0 (0-1,000) |
| Mozambique | 7,213,000 (5,932,000-9,001,000) | 36,000 (23,000-51,000) | 18,000 (13,000-26,000) |
| Namibia | 8,000 (7,000-9,000) | 0 (0-0) | 0 (0-0) |
| Niger | 6,776,000 (5,105,000-10,804,000) | 28,000 (15,000-52,000) | 17,000 (12,000-29,000) |
| Nigeria | 41,984,000 (34,187,000-52,262,000) | 228,000 (149,000-356,000) | 107,000 (80,000-146,000) |
| Rwanda | 1,617,000 (1,336,000-1,960,000) | 10,000 (7,000-15,000) | 4,000 (3,000-6,000) |
| Sao Tome and Principe | 1,000 (1,000-1,000) | 0 (0-0) | 0 (0-0) |
| Senegal | 480,000 (385,000-587,000) | 0 (0-0) | 2,000 (2,000-3,000) |
| Sierra Leone | 1,520,000 (1,217,000-2,128,000) | 2,000 (2,000-4,000) | 9,000 (7,000-14,000) |
| South Africa | 0 (0-0) | 0 (0-0) | 0 (0-0) |
| South Sudan | 2,077,000 (1,640,000-2,991,000) | 13,000 (9,000-23,000) | 7,000 (5,000-11,000) |
| Togo | 1,129,000 (921,000-1,453,000) | 6,000 (4,000-9,000) | 3,000 (2,000-4,000) |
| Uganda | 8,602,000 (7,238,000-11,591,000) | 122,000 (85,000-212,000) | 22,000 (17,000-33,000) |
| United Republic of Tanzania | 4,877,000 (3,899,000-6,456,000) | 35,000 (24,000-56,000) | 17,000 (12,000-24,000) |
| Zambia | 2,226,000 (1,812,000-2,886,000) | 0 (0-0) | 6,000 (4,000-8,000) |
| Zimbabwe | 461,000 (357,000-582,000) | 0 (0-0) | 1,000 (1,000-2,000) |
| Total | 150,717,000 (122,029,000-194,188,000) | 1,143,000 (755,000-1,820,000) | 411,000 (298,000-583,000) |

Table 9. Resistant Cases Averted by Treatment Failure Rate (TFR) Scenario

| Scenario 1 (VE constant at 40% and dropping to 0% in year 5) | | |
| --- | --- | --- |
| Country | **Scenario 1 Resistant Cases Averted (UI)** | **Scenario 1 with Increasing Resistance Resistant Cases Averted (UI)** |
| Angola | 25,000 (17,000-40,000) | 101,000 (70,000-149,000) |
| Benin | 4,000 (3,000-6,000) | 47,000 (31,000-63,000) |
| Botswana | 0 (0-0) | 0 (0-0) |
| Burkina Faso | 164,000 (112,000-256,000) | 361,000 (253,000-565,000) |
| Burundi | 46,000 (31,000-78,000) | 125,000 (81,000-204,000) |
| Cameroon | 43,000 (27,000-66,000) | 152,000 (95,000-227,000) |
| Central African Republic | 3,000 (2,000-6,000) | 29,000 (21,000-54,000) |
| Chad | 2,000 (1,000-3,000) | 55,000 (35,000-85,000) |
| Comoros | 0 (0-0) | 0 (0-0) |
| Congo | 1,000 (1,000-2,000) | 13,000 (9,000-20,000) |
| Côte d'Ivoire | 4,000 (2,000-5,000) | 66,000 (36,000-80,000) |
| Democratic Republic of the Congo | 42,000 (27,000-62,000) | 443,000 (283,000-665,000) |
| Equatorial Guinea | 1,000 (1,000-2,000) | 5,000 (3,000-9,000) |
| Eritrea | 0 (0-0) | 0 (0-0) |
| Eswatini | 0 (0-0) | 0 (0-0) |
| Ethiopia | 2,000 (1,000-2,000) | 13,000 (8,000-19,000) |
| Gabon | 1,000 (1,000-2,000) | 5,000 (3,000-8,000) |
| Gambia | 0 (0-0) | 1,000 (0-1,000) |
| Ghana | 18,000 (11,000-27,000) | 111,000 (75,000-171,000) |
| Guinea | 10,000 (7,000-16,000) | 61,000 (40,000-105,000) |
| Guinea-Bissau | 0 (0-1,000) | 3,000 (2,000-6,000) |
| Kenya | 9,000 (5,000-16,000) | 39,000 (24,000-63,000) |
| Liberia | 12,000 (7,000-20,000) | 59,000 (40,000-89,000) |
| Madagascar | 1,000 (1,000-2,000) | 19,000 (13,000-26,000) |
| Malawi | 16,000 (11,000-28,000) | 70,000 (46,000-111,000) |
| Mali | 5,000 (4,000-9,000) | 80,000 (57,000-113,000) |
| Mauritania | 0 (0-0) | 1,000 (1,000-2,000) |
| Mozambique | 22,000 (14,000-30,000) | 191,000 (115,000-248,000) |
| Namibia | 0 (0-0) | 0 (0-0) |
| Niger | 17,000 (9,000-37,000) | 112,000 (70,000-191,000) |
| Nigeria | 139,000 (94,000-221,000) | 1,444,000 (921,000-2,073,000) |
| Rwanda | 6,000 (4,000-9,000) | 27,000 (19,000-40,000) |
| Sao Tome and Principe | 0 (0-0) | 0 (0-0) |
| Senegal | 0 (0-0) | 2,000 (1,000-3,000) |
| Sierra Leone | 2,000 (1,000-3,000) | 65,000 (45,000-97,000) |
| South Africa | 0 (0-0) | 0 (0-0) |
| South Sudan | 8,000 (5,000-15,000) | 56,000 (39,000-98,000) |
| Togo | 3,000 (2,000-5,000) | 28,000 (20,000-42,000) |
| Uganda | 76,000 (52,000-131,000) | 521,000 (392,000-899,000) |
| United Republic of Tanzania | 22,000 (15,000-36,000) | 150,000 (106,000-247,000) |
| Zambia | 0 (0-0) | 58,000 (40,000-92,000) |
| Zimbabwe | 0 (0-0) | 0 (0-1,000) |
| Total | 705,000 (465,000-1,135,000) | 4,513,000 (2,997,000-6,862,000) |

**
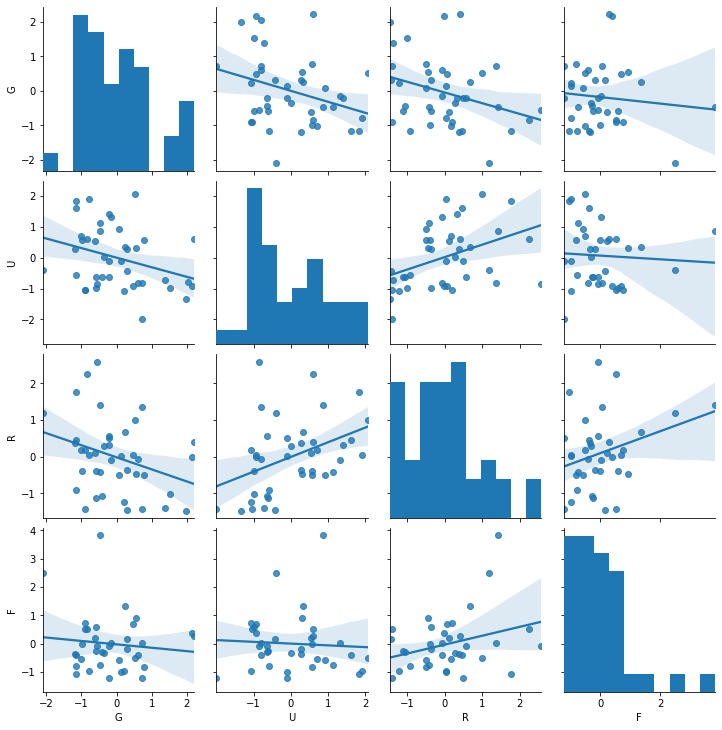
**

Figure 1. Pairwise Ordinary Least Squares OLS Regressions for GDP per Capita (G), Under 5 Mortality per 1,000 (U), Treatment Received Rate (R), and Treatment Failure Rate (F).


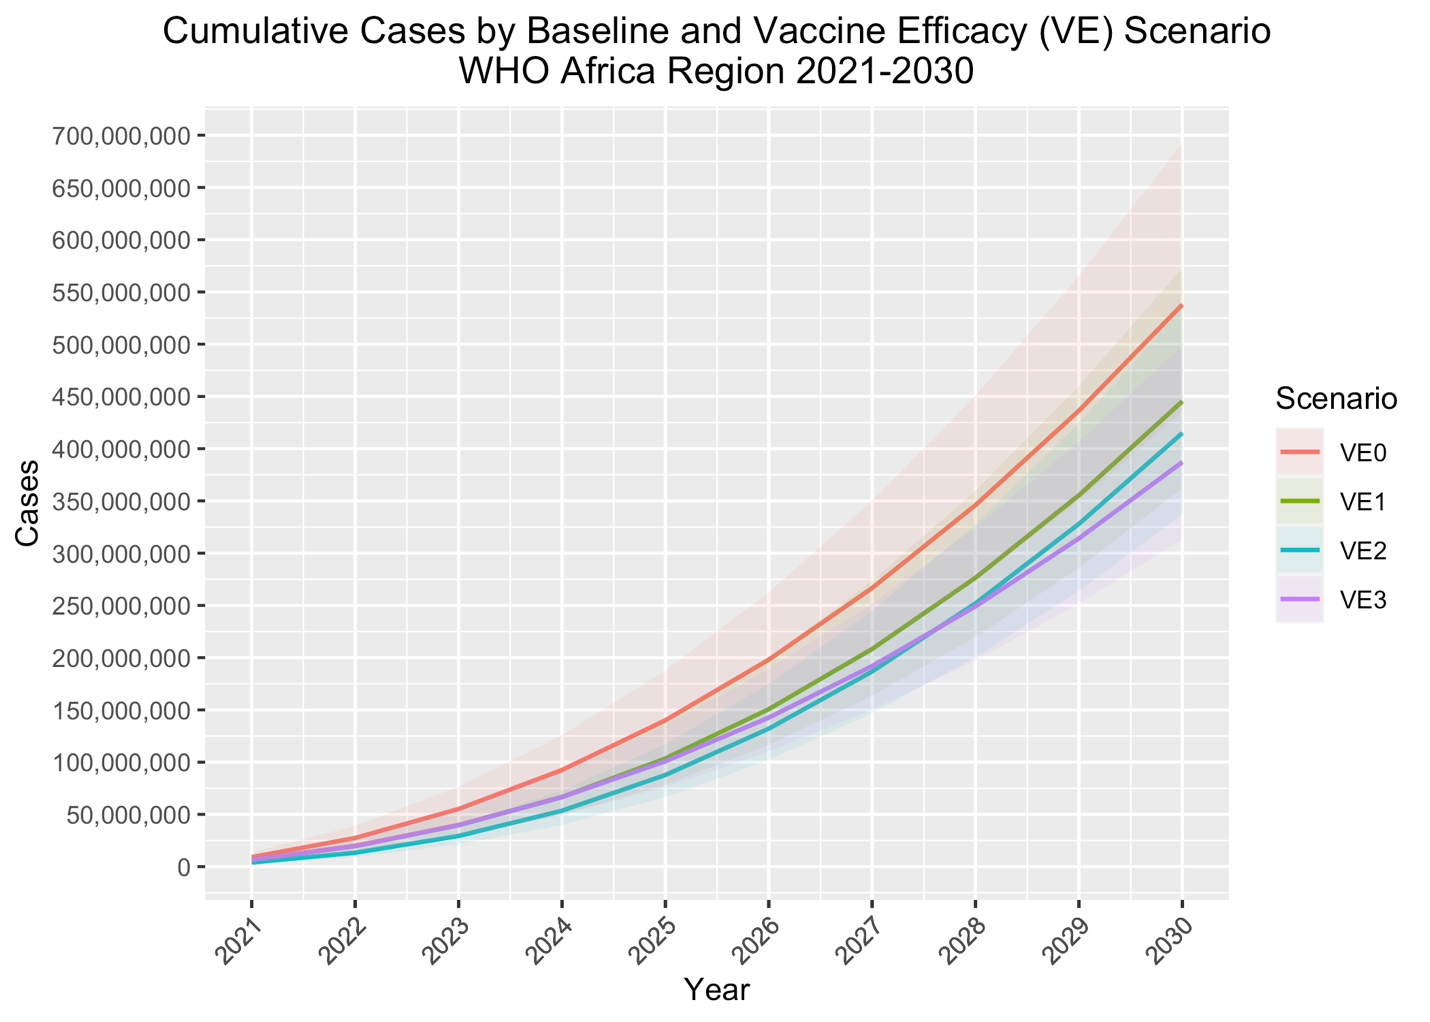


Figure 2. Cumulative Cases by Baseline and Vaccine Efficacy (VE) Scenario, WHO Africa Region 2021-2030.


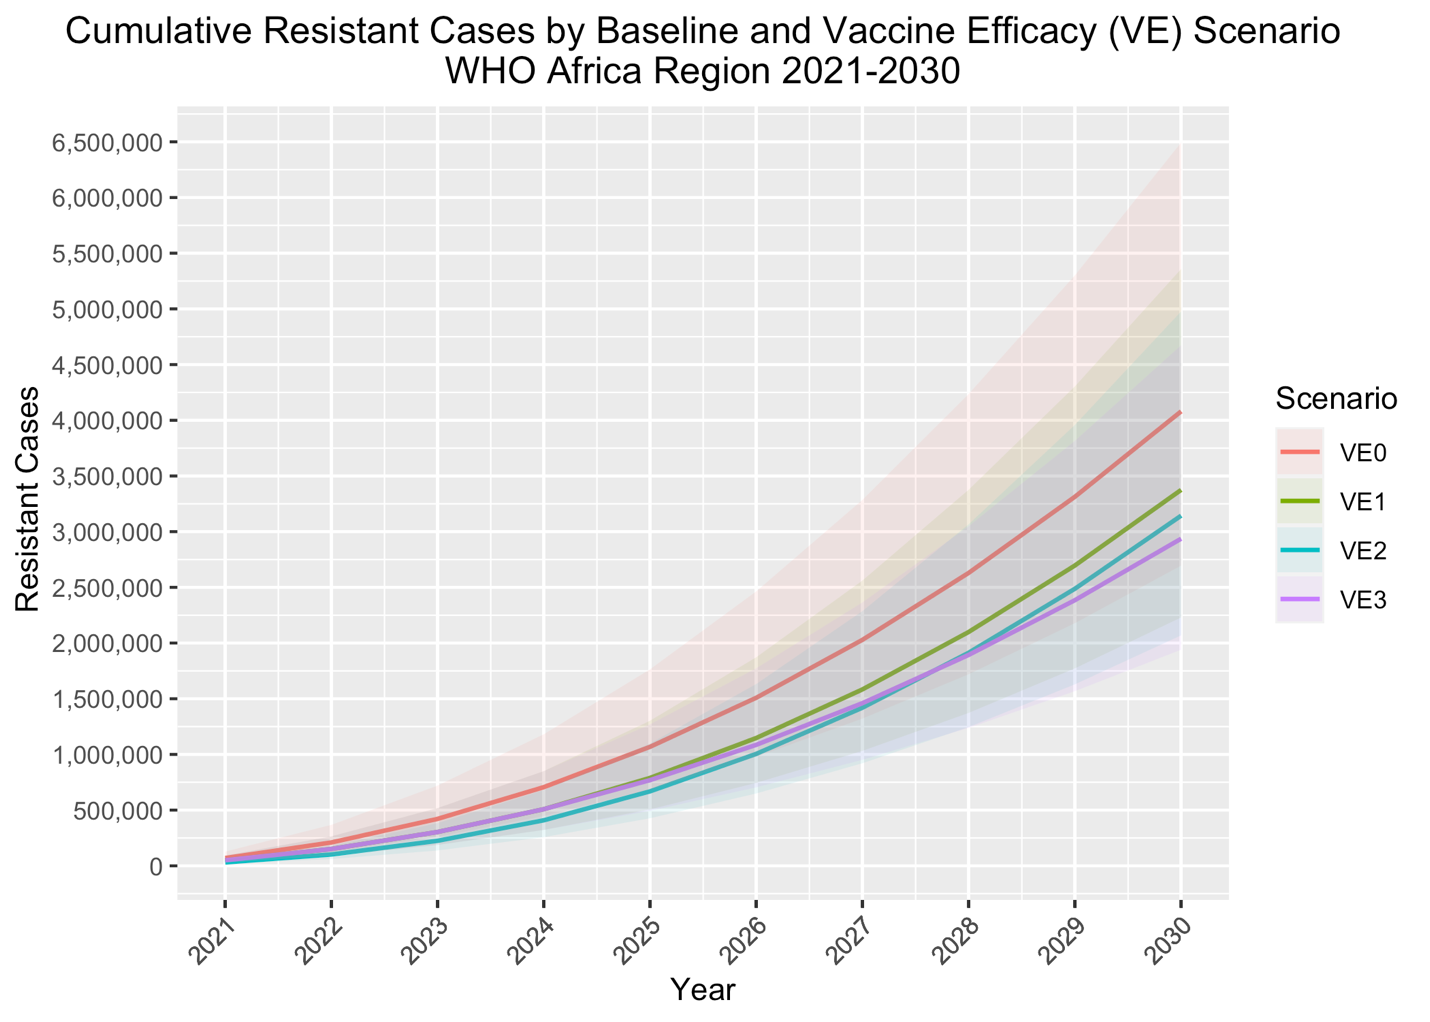


Figure 3. Cumulative Resistant Cases by Baseline and Vaccine Efficacy (VE) Scenario, WHO Africa Region 2021-2030.


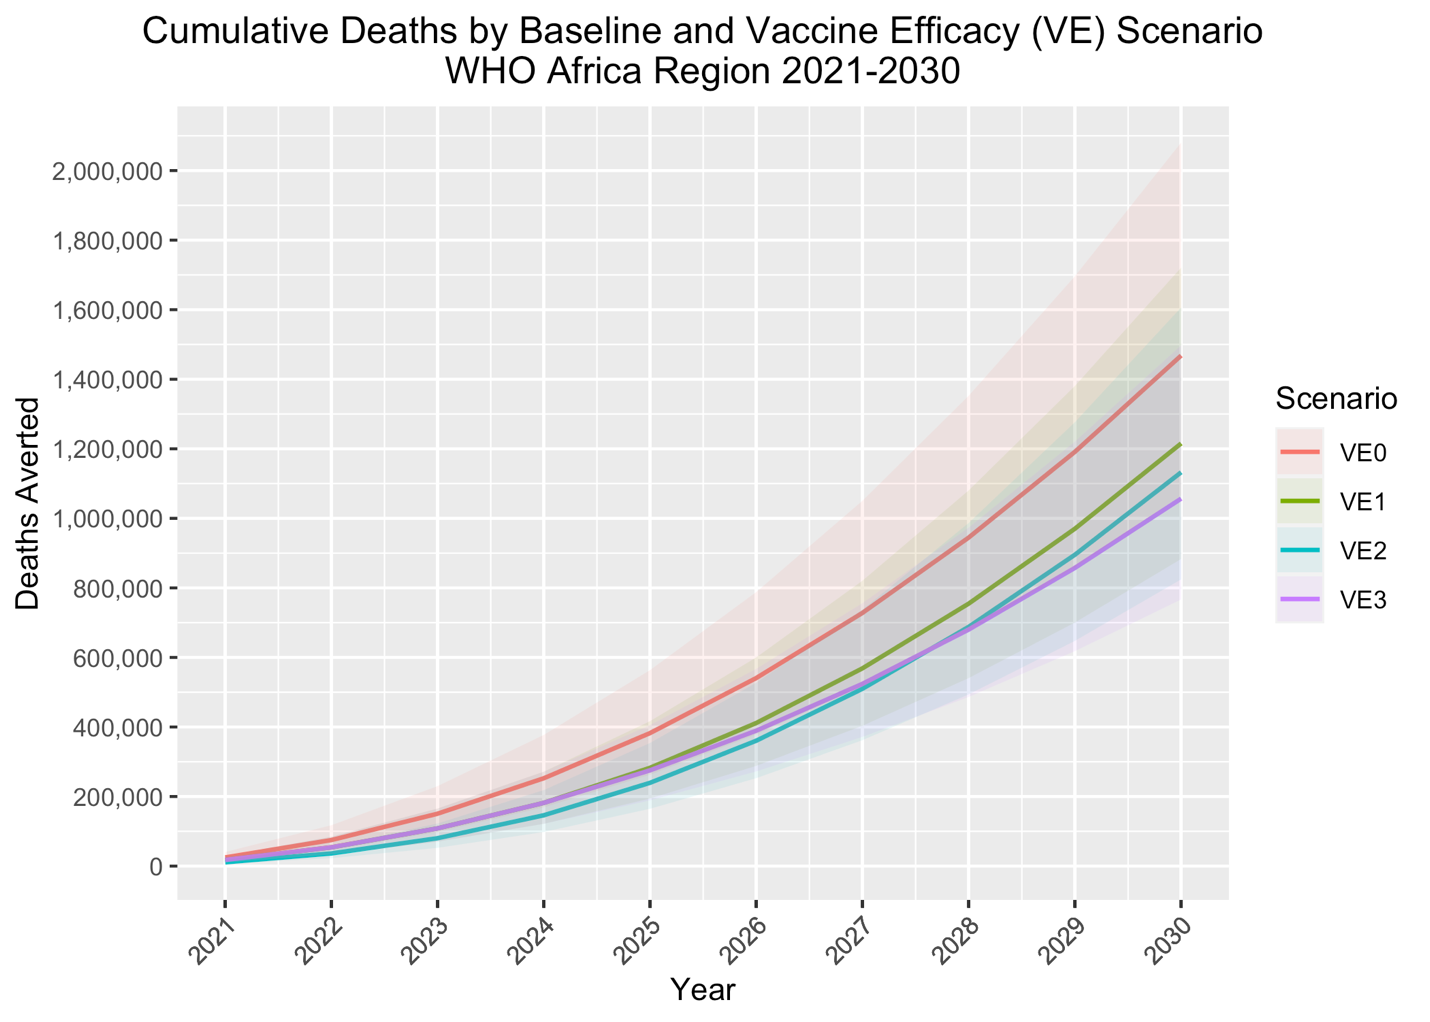


Figure 4. Cumulative Deaths by Baseline and Vaccine Efficacy (VE) Scenario, WHO Africa Region 2021-2030.

**Equations**

Age group incidence rates were calculated using the following equation:

|  | (1) |
| --- | --- |

...where is the annual number of new cases per 1,000 population for age group (n), Gis the total prevalence of cases among all ages reported by the Global Health Observatory, Hn is the prevalence of cases attributed to age group (n) reported by IHME, Ht is the total prevalence among all ages reported by IHME, and Wn is the estimated population of age group (n) reported by the World Population Prospects. Age groups 1-4 and 5-9 were reported by IHME. The incidence rate for children aged 5-9 was applied to children aged 10 in our study.

**References**

1. United Nations. World Population Prospects 2019 [Internet]. Department of Economic and Social Affairs, United Nations Secretariat; 2020 [cited 2020 Apr 23]. Available from: https://population.un.org/wpp/Download/Standard/Population/

2. World Health Organization (WHO). Malaria Incidence by Country. Global Health Observatory Data Repository. [Internet]. 2021 Apr. Available from: https://apps.who.int/gho/data/view.main.MALARIAINCIDENCEv?lang=enhttps://apps.who.int/gho/data/node.main.A1372?lang=en

3. Global Burden of Disease Collaborative Network. Global Burden of Disease Study 2019 [Internet]. Institution for Health Metrics and Evaluation; 2021. Available from: https://doi.org/10.6069/1D4Y-YQ37

4. World Health Organization. World Malaria Report 2021 [Internet]. Geneva, Switzerland; 2021 Dec. Available from: https://www.who.int/publications/i/item/9789240040496

5. The World Bank. Children with fever receiving antimalaria drugs (% of children under age 5 with fever) [Internet]. The World Bank; 2018. Available from: https://data.worldbank.org/indicator/SH.MLR.TRET.ZS

6. World Health Organization (WHO). Malaria Threats Map [Internet]. 2021 Sep. Available from: https://apps.who.int/malaria/maps/threats/

7. World Health Organization. Estimated Malaria Deaths by Country. Global Health Observatory Data Repository [Internet]. 2019 Feb. Available from: https://apps.who.int/gho/data/node.main.A1368?lang=en

8. World Health Organization. Malaria: Estimated cases by country [Internet]. 2019 [cited 2021 Jun 16]. Available from: https://apps.who.int/gho/data/node.main.A1372?lang=en
