# Supplementary material for: Malaria Vaccine Impact on Cases, Drug-resistant Cases, and Deaths in Africa: A Modeling Study
Source: Research Square preprint supplement (doi:10.21203/rs.3.rs-2362054/v1), 2022-12-19
Supplement: Supplementary file 3 [file da4075dbcccc5057946fccf7.xlsx]

## Sheet: Malaria Results
country	year	I_VE0	I_VE0_min	I_VE0_max	Ires_VE0	Ires_VE0_min	Ires_VE0_max	D_VE0	D_VE0_min	D_VE0_max	Ires2_VE0	Ires2_VE0_min	Ires2_VE0_max	I_VE1	I_VE1_min	I_VE1_max	Ires_VE1	Ires_VE1_min	Ires_VE1_max	D_VE1	D_VE1_min	D_VE1_max	Ires2_VE1	Ires2_VE1_min	Ires2_VE1_max	I_VE2	I_VE2_min	I_VE2_max	Ires_VE2	Ires_VE2_min	Ires_VE2_max	D_VE2	D_VE2_min	D_VE2_max	Ires2_VE2	Ires2_VE2_min	Ires2_VE2_max	I_VE3	I_VE3_min	I_VE3_max	Ires_VE3	Ires_VE3_min	Ires_VE3_max	D_VE3	D_VE3_min	D_VE3_max	Ires2_VE3	Ires2_VE3_min	Ires2_VE3_max
Angola	2021	350.686	225.947	518.594	2.36441	1.37559	4.24853	1.01173	0.600996	1.57935	2.36441	1.37559	4.24853	252.494	162.682	373.388	1.70238	0.990426	3.05894	0.728443	0.432717	1.13713	1.70238	0.990426	3.05894	154.302	99.4166	228.181	1.04034	0.60526	1.86935	0.44516	0.264438	0.694914	1.04034	0.60526	1.86935	252.494	162.682	373.388	1.70238	0.990426	3.05894	0.728443	0.432717	1.13713	1.70238	0.990426	3.05894
Angola	2022	711.466	515.085	1048.54	4.79688	3.04678	8.4825	2.05258	1.28984	3.08167	10.1718	6.02131	18.3022	512.256	370.861	754.948	3.45376	2.19368	6.1074	1.47786	0.928686	2.2188	7.3237	4.33534	13.1776	362.141	261.947	536.133	2.44165	1.56191	4.33722	1.04478	0.660212	1.5757	5.55973	3.20132	10.0342	512.256	370.861	754.948	3.45376	2.19368	6.1074	1.47786	0.928686	2.2188	7.3237	4.33534	13.1776
Angola	2023	1081.44	803.844	1530.79	7.29132	4.9537	11.9603	3.11994	2.0767	4.34516	23.5726	14.9616	39.3891	778.61	578.753	1102.12	5.24958	3.56657	8.61113	2.24629	1.49519	3.1284	16.9714	10.7716	28.3589	624.484	463.379	883.76	4.21043	2.80176	6.85266	1.80163	1.18974	2.54473	15.1593	9.60336	25.8795	778.61	578.753	1102.12	5.24958	3.56657	8.61113	2.24629	1.49519	3.1284	16.9714	10.7716	28.3589
Angola	2024	1460.9	1089.62	1929.76	9.84973	6.54901	15.6114	4.21468	2.92039	5.82819	42.7084	27.2189	65.8564	1051.77	784.481	1389.31	7.0913	4.71502	11.2393	3.03435	2.10257	4.19588	30.7465	19.5953	47.4089	942.76	700.002	1228.74	6.35632	4.20727	9.84177	2.71986	1.8996	3.80907	31.4782	19.5551	48.857	1051.77	784.481	1389.31	7.0913	4.71502	11.2393	3.03435	2.10257	4.19588	30.7465	19.5953	47.4089
Angola	2025	1881.26	1451.94	2517.56	12.6839	8.73365	20.3666	5.42743	3.84165	7.39915	69.8552	45.468	109.495	1461.32	1134.21	1962.89	9.85258	6.80064	15.8795	4.2159	2.98873	5.82051	57.5712	36.8963	91.1164	1349.66	1052.89	1785.87	9.09974	6.28561	14.4474	3.89376	2.74716	5.3731	58.3287	36.9071	91.4757	1354.35	1045.29	1812.38	9.13138	6.28756	14.6618	3.9073	2.76575	5.3266	50.2866	32.7314	78.8172
Angola	2026	2313.73	1913.13	2960.93	15.5997	10.7671	23.9534	6.6751	4.69215	9.27919	103.579	68.8099	160.315	1882.62	1560.75	2391.49	12.6931	8.70565	19.3467	5.43136	3.81651	7.65512	90.9761	59.9133	144.011	1767.74	1460.24	2248.69	11.9185	8.1039	18.0592	5.09991	3.56796	7.23206	91.7508	60.2602	145.465	1665.62	1377.24	2131.46	11.23	7.75128	17.2432	4.8053	3.37796	6.67962	74.5583	49.5326	115.4
Angola	2027	2754.89	2325.78	3592.27	18.5742	12.4395	29.0608	7.94785	5.65603	11.0269	144.035	91.1103	220.076	2312.98	1932.44	3008.56	15.5947	10.3267	24.3387	6.67295	4.75861	9.26417	131.105	82.1839	201.473	2195.62	1834.33	2822.45	14.8034	9.71212	22.8332	6.33436	4.50475	8.77368	131.9	82.5958	202.954	1983.11	1674.27	2585.77	13.3706	8.95492	20.9184	5.72126	4.07172	7.93713	103.673	65.5821	158.4
Angola	2028	3206.65	2681.91	4186.97	21.6201	14.9907	33.8718	9.25118	6.56763	12.7448	191.371	128.837	294.6	2753.87	2293.74	3589.1	18.5673	12.8258	29.0351	7.94489	5.61705	10.9385	178.111	118.838	274.765	2633.98	2171.8	3398.95	17.759	12.1978	27.4969	7.59903	5.31844	10.4571	178.935	119.211	275.165	2308.2	1930.61	3013.67	15.5625	10.7909	24.3801	6.65915	4.72781	9.17312	137.735	92.7291	212.011
Angola	2029	3669.13	3039.9	4708	24.7382	16.9139	38.0869	10.5854	7.76718	14.3043	245.748	160.76	377.415	3205.39	2609.97	4095.66	21.6115	14.6969	33.1332	9.24754	6.76832	12.5722	232.157	150.511	357.858	3082.92	2495.94	3901.3	20.7858	14.055	31.5608	8.89421	6.39399	12.0563	233.016	150.903	359.448	2640.97	2188.11	3388.53	17.8061	12.1749	27.4126	7.6192	5.5911	10.295	176.86	115.699	271.604
Angola	2030	4142.55	3409.17	5300.72	27.9301	19.0977	42.8819	11.9512	8.76232	15.7967	307.339	206.484	458.765	3668.21	2969.39	4674.33	24.732	16.8298	37.8145	10.5828	7.69956	13.9898	293.447	196.894	437.984	3542.64	2852.48	4475.14	23.8854	16.172	36.2031	10.2205	7.31601	13.5856	294.314	197.345	438.407	2981.59	2453.79	3814.91	20.1026	13.7462	30.862	8.60187	6.3071	11.3685	221.171	148.603	330.104
Benin	2021	205.159	137.299	290.809	0.400915	0.221956	0.691703	0.525207	0.318007	0.788025	0.400915	0.221956	0.691703	147.715	98.8553	209.383	0.288659	0.159808	0.498026	0.378149	0.228965	0.567378	0.288659	0.159808	0.498026	90.27	60.4115	127.956	0.176403	0.0976605	0.304349	0.231091	0.139923	0.346731	0.176403	0.0976605	0.304349	147.715	98.8553	209.383	0.288659	0.159808	0.498026	0.378149	0.228965	0.567378	0.288659	0.159808	0.498026
Benin	2022	413.737	303.625	566.543	0.808512	0.474181	1.32017	1.05917	0.747799	1.50141	3.95118	2.42258	6.51817	297.891	218.61	407.911	0.582129	0.34141	0.950522	0.762601	0.538415	1.08102	2.84485	1.74426	4.69308	210.767	153.892	288.45	0.411873	0.243426	0.668165	0.539563	0.38113	0.768781	2.2352	1.37377	3.69374	297.891	218.61	407.911	0.582129	0.34141	0.950522	0.762601	0.538415	1.08102	2.84485	1.74426	4.69308
Benin	2023	626.117	497.293	808.311	1.22354	0.751033	1.8734	1.60286	1.11507	2.2817	10.7056	6.90918	15.8939	450.782	358.037	581.951	0.880903	0.540722	1.34878	1.154	0.802821	1.64272	7.70728	4.97415	11.4424	362.092	288.247	471.519	0.707587	0.440977	1.06132	0.926955	0.620908	1.32445	7.08783	4.54173	10.555	450.782	358.037	581.951	0.880903	0.540722	1.34878	1.154	0.802821	1.64272	7.70728	4.97415	11.4424
Benin	2024	842.35	687.292	1069.95	1.64609	1.06231	2.45866	2.15642	1.5818	3.00016	20.7212	13.6095	30.6554	606.424	494.796	770.27	1.18505	0.76479	1.77004	1.55244	1.1388	2.1598	14.9164	9.79701	22.0667	544.81	436.868	696.579	1.06465	0.698433	1.56309	1.39471	1.00876	1.94401	15.6632	10.2786	23.3546	606.424	494.796	770.27	1.18505	0.76479	1.77004	1.55244	1.1388	2.1598	14.9164	9.79701	22.0667
Benin	2025	1064.04	877.769	1340.37	2.07931	1.36296	3.02191	2.72393	2.05408	3.80232	34.1567	21.7437	50.3057	823.86	677.392	1041.77	1.60996	1.06009	2.32083	2.10908	1.5744	2.94692	28.2505	17.864	41.8052	761.069	623.605	967.964	1.48726	0.976896	2.156	1.94834	1.46537	2.72695	29.008	18.3528	42.7893	765.968	631.903	964.838	1.49683	0.981177	2.1754	1.96088	1.47872	2.73703	24.5855	15.6513	36.2062
Benin	2026	1290.19	1058.88	1623.89	2.52125	1.63984	3.6692	3.30289	2.4779	4.48871	50.9963	34.2961	74.2595	1045.45	854.703	1321.92	2.04299	1.33123	2.95475	2.67636	2.0001	3.67015	44.9805	30.1237	66.4134	981.386	795.935	1243.59	1.91779	1.26894	2.73308	2.51235	1.89608	3.45296	45.7521	30.7861	67.3143	928.707	762.241	1168.9	1.81485	1.18043	2.64118	2.37749	1.78373	3.23085	36.7027	24.6851	53.4419
Benin	2027	1519.43	1247.7	1872.86	2.96923	1.95057	4.26444	3.88975	2.96713	5.32055	71.3047	46.7699	105.526	1270.34	1032.47	1576.9	2.48245	1.63643	3.56108	3.25207	2.4619	4.48742	65.1764	42.7443	97.8096	1205.31	970.66	1512.17	2.35537	1.56972	3.38643	3.08559	2.34901	4.26694	65.9618	43.251	98.8382	1093.64	898.074	1347.99	2.13716	1.40402	3.06946	2.79972	2.13577	3.82924	51.3137	33.6596	75.9338
Benin	2028	1752.48	1422.89	2147.05	3.42464	2.29986	4.94072	4.48635	3.43011	6.05907	95.1293	62.2294	136.189	1499.05	1203.91	1845.44	2.92939	1.95965	4.20113	3.83757	2.9322	5.22787	88.8894	58.1308	128.067	1433.05	1141.16	1785.8	2.80042	1.85903	3.97024	3.66861	2.81766	5.01487	89.6915	58.6485	129.286	1261.29	1024.11	1545.15	2.46477	1.65534	3.55598	3.2289	2.46887	4.36034	68.452	44.7817	97.9907
Benin	2029	1989.33	1641.33	2427.27	3.88748	2.5507	5.56202	5.09269	3.94254	6.88035	122.527	76.772	174.803	1731.59	1418.59	2115.6	3.38381	2.20469	4.80983	4.43287	3.42839	6.01833	116.177	72.6005	166.481	1664.6	1354.89	2025.11	3.25291	2.10254	4.57539	4.26138	3.3122	5.7912	116.998	73.1306	167.429	1431.65	1181.23	1746.7	2.79769	1.83579	4.0029	3.66504	2.8375	4.95098	88.1576	55.2429	125.772
Benin	2030	2229.98	1853.2	2708.3	4.35776	2.87897	6.19278	5.70876	4.4145	7.6611	153.555	98.4871	218.21	1968.12	1626.91	2394.26	3.84603	2.52742	5.42853	5.03838	3.91823	6.80214	147.107	94.2513	210.675	1899.95	1562.1	2313.09	3.71281	2.42349	5.19002	4.86386	3.7848	6.58213	147.937	94.7875	211.446	1604.73	1333.62	1948.79	3.13591	2.07192	4.45656	4.10811	3.17699	5.51224	110.471	70.8618	156.986
Botswana	2021	0.0236701	0.0163473	0.0376869	3.61248e-05	2.04952e-05	6.86878e-05	6.05955e-05	3.7604e-05	0.00010391	3.61248e-05	2.04952e-05	6.86878e-05	0.0170425	0.01177	0.0271346	2.60098e-05	1.47565e-05	4.94552e-05	4.36288e-05	2.70749e-05	7.4815e-05	2.60098e-05	1.47565e-05	4.94552e-05	0.0104149	0.0071928	0.0165822	1.58949e-05	9.01788e-06	3.02226e-05	2.6662e-05	1.65458e-05	4.57203e-05	1.58949e-05	9.01788e-06	3.02226e-05	0.0170425	0.01177	0.0271346	2.60098e-05	1.47565e-05	4.94552e-05	4.36288e-05	2.70749e-05	7.4815e-05	2.60098e-05	1.47565e-05	4.94552e-05
Botswana	2022	0.0473787	0.0345594	0.0698403	7.23082e-05	4.70317e-05	0.000122297	0.000121289	8.26538e-05	0.00020715	0.000325564	0.000171277	0.000565193	0.0341126	0.0248828	0.050285	5.20619e-05	3.38629e-05	8.80538e-05	8.73284e-05	5.95107e-05	0.000149148	0.000234406	0.000123319	0.000406939	0.0241604	0.0177518	0.0357206	3.68731e-05	2.31751e-05	6.20757e-05	6.18507e-05	4.18141e-05	0.000105949	0.000183761	9.52373e-05	0.000321506	0.0341126	0.0248828	0.050285	5.20619e-05	3.38629e-05	8.80538e-05	8.73284e-05	5.95107e-05	0.000149148	0.000234406	0.000123319	0.000406939
Botswana	2023	0.0709568	0.0554727	0.102162	0.000108293	7.2151e-05	0.00018604	0.00018165	0.000130388	0.00028906	0.000868471	0.00058168	0.00149513	0.0510889	0.0399403	0.0735568	7.79707e-05	5.19487e-05	0.000133949	0.000130788	9.3879e-05	0.000208123	0.000625299	0.00041881	0.00107649	0.0411678	0.0323868	0.0597344	6.28294e-05	4.19216e-05	0.000107684	0.00010539	7.49916e-05	0.000165057	0.000574644	0.000384886	0.00100146	0.0510889	0.0399403	0.0735568	7.79707e-05	5.19487e-05	0.000133949	0.000130788	9.3879e-05	0.000208123	0.000625299	0.00041881	0.00107649
Botswana	2024	0.0944285	0.0773805	0.137205	0.000144115	9.89456e-05	0.000243343	0.000241737	0.00016986	0.000385133	0.00166349	0.00110341	0.00278657	0.0679885	0.055714	0.0987878	0.000103762	7.12408e-05	0.000175207	0.000174051	0.000122299	0.000277296	0.00119771	0.000794456	0.00200633	0.0614293	0.0491974	0.0899788	9.3752e-05	6.3595e-05	0.000157158	0.000157259	0.000106688	0.000248015	0.00125875	0.000823285	0.00210776	0.0679885	0.055714	0.0987878	0.000103762	7.12408e-05	0.000175207	0.000174051	0.000122299	0.000277296	0.00119771	0.000794456	0.00200633
Botswana	2025	0.123543	0.102086	0.175756	0.000188548	0.000131486	0.000302662	0.00031627	0.000230802	0.000491699	0.0029625	0.00203864	0.00482437	0.0971765	0.0794614	0.138605	0.000148308	0.000102546	0.000234719	0.000248772	0.000183381	0.000384155	0.00249759	0.00170346	0.00409974	0.0906556	0.072889	0.129397	0.000138356	9.61312e-05	0.000219749	0.000232078	0.000167847	0.00035504	0.00255902	0.00172919	0.00421501	0.0889508	0.0735022	0.126545	0.000135755	9.46702e-05	0.000217917	0.000227714	0.000166178	0.000354023	0.002133	0.00146782	0.00347355
Botswana	2026	0.152568	0.125551	0.207716	0.000232845	0.000165395	0.000368938	0.000390574	0.000285586	0.000574217	0.00457328	0.00311927	0.00750948	0.126313	0.103104	0.172152	0.000192777	0.000134742	0.000303205	0.000323362	0.000235748	0.000467125	0.00411054	0.00275689	0.00678826	0.119811	0.097959	0.162971	0.000182853	0.000127748	0.000291582	0.000306716	0.000222979	0.000440387	0.00417151	0.00280689	0.00690269	0.109849	0.090397	0.149555	0.000167649	0.000119084	0.000265635	0.000281213	0.000205622	0.000413436	0.00329276	0.00224587	0.00540682
Botswana	2027	0.181709	0.152056	0.244324	0.000277321	0.000190199	0.000433768	0.000465176	0.000344106	0.000686412	0.00649344	0.00435679	0.0101478	0.155489	0.12824	0.210682	0.000237304	0.000161016	0.000370666	0.000398052	0.000288674	0.000590131	0.00603239	0.00399325	0.00940464	0.148944	0.122747	0.200685	0.000227315	0.00015568	0.000356065	0.000381297	0.00027631	0.000561168	0.00609297	0.00406231	0.00954088	0.130831	0.10948	0.175913	0.000199671	0.000136943	0.000312312	0.000334927	0.000247756	0.000494216	0.00467527	0.00313689	0.00730639
Botswana	2028	0.210899	0.176067	0.275669	0.000321869	0.000217185	0.000495155	0.000539902	0.00039485	0.000810351	0.00872437	0.00570939	0.0133465	0.184662	0.154274	0.244804	0.000281827	0.000187994	0.000432013	0.000472736	0.000347606	0.000703286	0.00826402	0.00534649	0.0126715	0.178067	0.147379	0.237166	0.000271761	0.000182604	0.000417286	0.000455851	0.000331941	0.00067386	0.00832401	0.00541509	0.0127395	0.151847	0.126768	0.198482	0.000231746	0.000156373	0.000356511	0.000388729	0.000284292	0.000583452	0.00628154	0.00411076	0.00960948
Botswana	2029	0.24016	0.208649	0.314825	0.000366526	0.000244293	0.000563094	0.000614809	0.000452027	0.000933788	0.0112671	0.0072535	0.0171197	0.213864	0.18661	0.278652	0.000326395	0.000215053	0.000499846	0.000547493	0.000403078	0.000826496	0.0108064	0.00689062	0.0165814	0.20722	0.179864	0.270753	0.000316255	0.000209608	0.000484993	0.000530484	0.00038891	0.000796863	0.0108658	0.00695868	0.0166486	0.172915	0.150227	0.226674	0.000263899	0.000175891	0.000405427	0.000442662	0.000325459	0.000672327	0.00811227	0.00522252	0.0123262
Botswana	2030	0.269483	0.236987	0.3466	0.000411278	0.000273698	0.000617901	0.000689875	0.000514074	0.00102803	0.0141219	0.00912639	0.0218197	0.243077	0.212047	0.310274	0.000370978	0.00024433	0.000554377	0.000622276	0.00046395	0.000920288	0.013659	0.00876169	0.0211804	0.236417	0.204666	0.3054	0.000360815	0.000238878	0.000539496	0.000605229	0.000451401	0.000890584	0.0137189	0.00883027	0.021252	0.194027	0.170631	0.249552	0.00029612	0.000197063	0.000444889	0.00049671	0.000370133	0.000740183	0.0101677	0.006571	0.0157102
Burkina Faso	2021	358.918	225.853	575.918	16.1075	9.23134	30.8666	1.26141	0.756948	2.12799	16.1075	9.23134	30.8666	258.421	162.614	414.661	11.5974	6.64656	22.224	0.908217	0.545002	1.53215	11.5974	6.64656	22.224	157.924	99.3753	253.404	7.08728	4.06179	13.5813	0.555021	0.333057	0.936314	7.08728	4.06179	13.5813	258.421	162.614	414.661	11.5974	6.64656	22.224	0.908217	0.545002	1.53215	11.5974	6.64656	22.224
Burkina Faso	2022	722.578	466.148	1055.6	32.4277	20.3117	53.2971	2.53949	1.62996	4.12188	46.9157	29.0321	79.2465	520.256	335.626	760.035	23.348	14.6245	38.3739	1.82843	1.17357	2.96775	33.7793	20.9031	57.0575	368.183	236.24	541.94	16.5232	10.2938	27.3324	1.29397	0.82421	2.11614	24.9298	15.3532	42.7135	520.256	335.626	760.035	23.348	14.6245	38.3739	1.82843	1.17357	2.96775	33.7793	20.9031	57.0575
Burkina Faso	2023	1092.55	827.405	1552.49	49.0311	32.557	81.8465	3.83974	2.54162	5.97697	92.6965	59.3275	157.518	786.582	595.694	1117.7	35.3001	23.4399	58.9242	2.76443	1.82988	4.30303	66.7349	42.7126	113.401	632.025	482.816	908.179	28.3639	18.4872	47.6085	2.22124	1.47756	3.4378	57.7507	35.5443	98.8918	786.582	595.694	1117.7	35.3001	23.4399	58.9242	2.76443	1.82988	4.30303	66.7349	42.7126	113.401
Burkina Faso	2024	1469	1136.34	2122.92	65.9254	45.2369	103.656	5.16277	3.38131	7.68948	153.705	102.736	245.535	1057.52	818.087	1528.21	47.4592	32.5662	74.6186	3.71664	2.43431	5.53531	110.643	73.9527	176.742	950.436	729.742	1391.38	42.6535	28.8897	66.7275	3.34029	2.18741	4.95442	109.849	71.5677	179.382	1057.52	818.087	1528.21	47.4592	32.5662	74.6186	3.71664	2.43431	5.53531	110.643	73.9527	176.742
Burkina Faso	2025	1851.09	1514.43	2558.87	83.0731	57.9856	134.077	6.50564	4.60956	9.26736	229.99	155.778	381.257	1432.68	1162.28	1993	64.2954	44.5509	104.611	5.03512	3.64652	7.18393	186.241	124.147	313.638	1323.4	1079.65	1841.4	59.3912	40.794	96.7997	4.65106	3.34103	6.67192	185.387	122.767	312.918	1332.47	1090.19	1841.87	59.7984	41.7407	96.5052	4.68295	3.3183	6.67029	165.536	112.126	274.413
Burkina Faso	2026	2240.62	1820.63	3016.69	100.554	69.3651	159.831	7.87462	5.75572	11.2523	322.017	219.556	511.852	1814.45	1458.02	2440.33	81.4286	56.2416	130.127	6.37686	4.68846	9.20392	277.471	184.818	444.119	1702.98	1335.6	2285.7	76.4261	52.4157	121.499	5.9851	4.42212	8.70296	276.591	183.321	442.256	1612.72	1310.52	2171.21	72.3752	49.9285	115.034	5.66786	4.14312	8.09799	231.743	158.015	368.371
Burkina Faso	2027	2636.32	2134.45	3557.03	118.312	79.6248	184.217	9.26529	6.83752	13.104	430.022	281.257	678.797	2202.43	1771.08	2970.22	98.8402	66.2631	154.729	7.7404	5.66481	10.8347	384.662	250.849	608.685	2089.03	1671.95	2812.91	93.7513	62.3708	147.811	7.34188	5.33208	10.2813	383.765	249.71	607.919	1897.35	1536.22	2559.82	85.1489	57.3094	132.582	6.66821	4.92147	9.42955	309.431	202.401	488.453
Burkina Faso	2028	3039.04	2474.69	3985.57	136.385	91.4943	218.946	10.6806	7.62231	14.9824	554.285	362.623	920.62	2597.27	2104.67	3391.68	116.56	77.892	188.924	9.12806	6.42853	12.8589	508.092	331.663	849.225	2481.91	1986.41	3228.09	111.383	73.9325	181.889	8.72265	6.09009	12.3406	507.188	330.51	848.461	2186.98	1780.94	2867.98	98.1471	65.847	157.559	7.68612	5.48604	10.7798	398.794	260.924	662.364
Burkina Faso	2029	3448.79	2873.83	4542.37	154.774	103.371	239.517	12.1207	8.63824	16.9568	695.08	453.111	1073.75	2999.03	2497.18	3934.11	134.59	89.5215	208.952	10.5401	7.4228	14.979	648.044	421.58	1001.05	2881.7	2386.67	3771.33	129.325	85.4939	201.797	10.1277	7.07852	14.365	647.14	420.418	1000.3	2481.62	2067.98	3268.27	111.37	74.3889	172.352	8.72162	6.2168	12.1989	500.029	325.998	772.471
Burkina Faso	2030	3865.49	3236.15	5032.05	173.475	116.721	270.303	13.5852	9.84229	18.9859	852.681	555.271	1335.23	3407.88	2824.69	4413.16	152.938	102.63	239.204	11.9769	8.60559	16.7884	804.829	517.236	1263.52	3288.41	2723.53	4275.23	147.577	98.5292	231.917	11.5571	8.25507	16.1634	803.897	517.002	1261.03	2781.21	2328.6	3620.27	124.815	83.9888	194.485	9.77451	7.08277	13.6572	613.324	399.433	960.194
Burundi	2021	149.879	92.0206	238.93	4.55061	2.44551	8.21466	0.383689	0.220605	0.655759	4.55061	2.44551	8.21466	107.913	66.2548	172.029	3.27644	1.76077	5.91455	0.276256	0.158836	0.472146	3.27644	1.76077	5.91455	65.9466	40.4891	105.129	2.00227	1.07602	3.61445	0.168823	0.0970664	0.288534	2.00227	1.07602	3.61445	107.913	66.2548	172.029	3.27644	1.76077	5.91455	0.276256	0.158836	0.472146	3.27644	1.76077	5.91455
Burundi	2022	303.232	218.848	452.558	9.20672	5.69221	16.2495	0.776273	0.486029	1.24564	14.9575	9.0484	26.9918	218.327	157.57	325.841	6.62884	4.09839	11.6997	0.558917	0.349941	0.896858	10.7694	6.51485	19.4341	154.405	110.661	231.953	4.68804	2.87634	8.34012	0.395277	0.242689	0.64546	8.02421	4.81662	14.5724	218.327	157.57	325.841	6.62884	4.09839	11.6997	0.558917	0.349941	0.896858	10.7694	6.51485	19.4341
Burundi	2023	459.129	337.428	683.657	13.9401	8.78351	23.5622	1.17537	0.837156	1.76342	31.3277	17.7808	52.214	330.561	242.942	492.211	10.0365	6.32393	16.9641	0.846237	0.602733	1.2696	22.5547	12.8015	37.5917	265.429	196.394	396.543	8.05897	4.88513	13.5406	0.679499	0.48227	1.01291	19.7549	10.7296	32.6329	330.561	242.942	492.211	10.0365	6.32393	16.9641	0.846237	0.602733	1.2696	22.5547	12.8015	37.5917
Burundi	2024	617.554	486.696	889.915	18.7502	12.1661	31.433	1.58094	1.09543	2.33117	53.7569	32.5351	91.4627	444.604	350.399	640.684	13.4991	8.75905	22.6297	1.13819	0.788669	1.67826	38.7004	23.4223	65.8439	399.374	305.699	586.631	12.1258	7.66498	20.4765	1.0224	0.692409	1.54624	38.9085	23.3345	67.083	444.604	350.399	640.684	13.4991	8.75905	22.6297	1.13819	0.788669	1.67826	38.7004	23.4223	65.8439
Burundi	2025	777.458	623.731	1063.03	23.6052	15.4522	39.0466	1.99029	1.43452	2.93721	82.1583	51.6071	135.903	601.392	479.639	829.443	18.2595	11.8053	30.0825	1.53956	1.09199	2.28302	66.8133	41.3407	109.785	555.588	438.547	758.964	16.8688	10.8017	27.9038	1.4223	0.981169	2.17682	67.0456	41.1547	111.084	559.701	449.043	765.262	16.9936	11.1245	28.1097	1.43283	1.03276	2.11445	59.143	37.1515	97.8308
Burundi	2026	940.039	740.359	1262.44	28.5415	19.6623	46.0015	2.4065	1.78847	3.66799	116.77	81.0007	184.291	761.062	598.519	1033.57	23.1074	15.9153	36.8889	1.94832	1.44028	3.00301	101.172	70.2471	157.74	714.501	558.037	996.43	21.6937	14.9448	34.6742	1.82912	1.32763	2.8951	101.409	69.5148	159.063	676.712	532.985	908.742	20.5463	14.1543	33.115	1.73238	1.28752	2.64032	84.0534	58.3061	132.654
Burundi	2027	1104.47	874.595	1489.14	33.534	22.8463	55.5873	2.82745	2.17763	4.32385	157.67	104.183	263.397	922.772	730.613	1255.73	28.0172	19.0663	46.3363	2.3623	1.81084	3.64849	141.823	93.827	236.421	875.652	689.638	1218.15	26.5865	17.8871	44.0961	2.24167	1.69662	3.5393	142.07	93.9483	237.777	795.045	629.594	1071.92	24.1392	16.446	40.013	2.03532	1.56761	3.11222	113.486	74.989	189.578
Burundi	2028	1271.15	1073.7	1660.25	38.5948	26.1303	61.9745	3.25415	2.44149	4.82207	204.939	134.723	322.055	1086.8	906.938	1423.8	32.9975	22.295	52.5887	2.78222	2.06933	4.1368	188.851	124.209	294.67	1039.12	869.703	1385.83	31.5497	21.101	50.3222	2.66015	1.97349	4.02649	189.111	124.338	296.062	914.985	772.883	1195.04	27.7808	18.8091	44.609	2.34236	1.75749	3.47065	147.499	96.9651	231.784
Burundi	2029	1440.14	1184.83	1898.04	43.7255	30.6036	69.0162	3.68676	2.73701	5.22995	258.663	174.431	409.667	1253.18	1010.22	1646.72	38.0489	26.4639	59.4954	3.20813	2.35954	4.54217	242.342	162.366	390.167	1204.89	972.533	1562.7	36.5829	25.4589	57.2011	3.08452	2.2625	4.42334	242.615	162.828	389.483	1036.57	852.816	1366.07	31.4724	22.0274	49.6752	2.65362	1.97015	3.76405	186.152	125.531	294.82
Burundi	2030	1611.52	1365.49	2089.49	48.9291	33.59	76.8467	4.1255	2.98991	5.8038	318.933	212.52	485.137	1422.03	1188.94	1827.66	43.1756	29.8054	67.1978	3.64039	2.60734	5.17025	302.397	202.511	457.745	1372.99	1145.76	1772.81	41.6867	28.4825	64.867	3.51485	2.50878	5.02198	302.666	202.443	458.595	1159.87	982.877	1503.77	35.216	24.1767	55.3086	2.96927	2.15213	4.17674	229.511	152.941	349.106
Cameroon	2021	250.999	168.717	383.41	4.28591	2.52164	7.33269	0.642558	0.387736	1.06321	4.28591	2.52164	7.33269	180.72	121.476	276.055	3.08586	1.81558	5.27954	0.462642	0.27917	0.765508	3.08586	1.81558	5.27954	110.44	74.2354	168.7	1.8858	1.10952	3.22638	0.282726	0.170604	0.46781	1.8858	1.10952	3.22638	180.72	121.476	276.055	3.08586	1.81558	5.27954	0.462642	0.27917	0.765508	3.08586	1.81558	5.27954
Cameroon	2022	505.494	354.197	711.937	8.63151	5.28686	14.0439	1.29406	0.83159	1.93195	16.672	9.99022	27.7926	363.955	255.021	512.594	6.21468	3.80654	10.1116	0.931726	0.598745	1.391	12.0039	7.19296	20.0107	257.557	180.655	363.878	4.39789	2.67717	7.178	0.659346	0.412262	1.00008	9.06225	5.40554	15.2819	363.955	255.021	512.594	6.21468	3.80654	10.1116	0.931726	0.598745	1.391	12.0039	7.19296	20.0107
Cameroon	2023	763.595	554.145	1067.24	13.0387	7.91234	20.3872	1.9548	1.34063	2.74721	37.2746	22.2547	61.5271	549.772	398.976	768.39	9.38758	5.69674	14.6782	1.40742	0.96523	1.9779	26.8365	16.0227	44.2973	441.859	321.04	627.712	7.54491	4.55123	12.0293	1.13116	0.776079	1.58943	23.8542	14.2103	39.7412	549.772	398.976	768.39	9.38758	5.69674	14.6782	1.40742	0.96523	1.9779	26.8365	16.0227	44.2973
Cameroon	2024	1025.38	769.662	1378.59	17.5088	11.1162	26.8873	2.62498	1.86614	3.70051	66.2089	41.0889	103.298	738.228	554.13	992.511	12.6055	8.00323	19.3573	1.88986	1.34355	2.66413	47.6655	29.5811	74.366	663.893	504.48	889.769	11.3362	7.14423	17.1386	1.69957	1.19389	2.40569	48.6197	29.8555	77.1812	738.228	554.13	992.511	12.6055	8.00323	19.3573	1.88986	1.34355	2.66413	47.6655	29.5811	74.366
Cameroon	2025	1313.65	1016.72	1801.63	22.4311	14.3756	34.5433	3.36294	2.48069	4.87113	106.896	67.6356	169.437	1022.38	789.028	1412.88	17.4576	11.2043	26.9058	2.6173	1.93092	3.82003	88.0915	55.9652	140.103	946.947	715.35	1315.85	16.1695	10.2976	24.942	2.42419	1.76598	3.5577	89.0561	56.2416	142.951	945.727	731.974	1296.99	16.1487	10.3494	24.8678	2.42106	1.78596	3.5067	76.9527	48.6899	121.972
Cameroon	2026	1606.59	1287.3	2130.89	27.4332	17.2693	41.7693	4.11288	2.96827	5.76134	156.934	96.4474	241.862	1310.95	1047.34	1736.26	22.385	14.0502	34.125	3.35603	2.36835	4.72441	137.855	84.6065	212.89	1234.26	978.639	1637.59	21.0754	13.1285	32.2672	3.1597	2.21272	4.50502	138.83	84.8849	214.771	1156.58	926.728	1533.95	19.749	12.4322	30.0683	2.96083	2.13693	4.14738	112.968	69.4277	174.094
Cameroon	2027	1902.92	1545.74	2437.72	32.4931	20.7363	49.1941	4.87147	3.51786	6.75681	216.451	137.337	320.484	1603.05	1302.36	2044.56	27.3727	17.4712	41.3312	4.10381	2.90923	5.74885	197.09	125.321	291.813	1525.39	1232.77	1937.92	26.0466	16.5378	39.0134	3.90499	2.75153	5.50509	198.08	125.603	292.75	1369.84	1112.73	1754.73	23.3905	14.9274	35.4113	3.50679	2.5325	4.86363	155.8	98.8555	230.666
Cameroon	2028	2203.35	1828.46	2805.54	37.6231	24.5289	55.6982	5.64058	4.02948	7.7574	285.564	188.773	410.834	1899.23	1581.63	2410.78	32.4302	21.2177	47.7242	4.86204	3.41233	6.73503	265.922	176.582	383.28	1820.59	1511.16	2300.02	31.0873	20.2724	45.3766	4.66071	3.25268	6.48818	266.932	176.873	384.758	1586.04	1316.19	2019.39	27.0823	17.6568	40.0913	4.06026	2.90073	5.58355	205.536	135.871	295.688
Cameroon	2029	2507.88	2113.87	3121.23	42.823	28.3577	63.3901	6.42017	4.86923	8.58701	364.405	247.246	525.642	2199.5	1842.24	2769.78	37.5573	25.0004	55.3044	5.63072	4.18569	7.55034	344.481	234.882	499.998	2119.87	1774.45	2657.6	36.1976	24.043	52.9269	5.42686	4.03166	7.30043	345.516	235.183	501.08	1805.17	1521.57	2246.57	30.8239	20.412	45.6253	4.62123	3.50505	6.18038	262.266	177.947	378.307
Cameroon	2030	2816.49	2377.56	3492.68	48.0927	31.8952	70.9349	7.21022	5.57679	9.76002	453.109	306.916	673.161	2504.04	2123.98	3100.58	42.7575	28.4934	62.9415	6.41035	4.84965	8.67371	432.928	293.674	642.514	2423.26	2051.59	3004.56	41.3781	27.5223	60.985	6.20354	4.69334	8.42017	433.968	294.692	644.518	2027.22	1711.3	2513.73	34.6155	22.9573	51.0535	5.18968	4.01421	7.02434	326.087	220.88	484.407
Central African Republic	2021	63.796	33.8059	117.491	0.31544	0.147737	0.729701	0.169835	0.0807818	0.3486	0.31544	0.147737	0.729701	45.9331	24.3402	84.5933	0.227116	0.106371	0.525385	0.122281	0.0581629	0.250992	0.227116	0.106371	0.525385	28.0703	14.8746	51.6959	0.138793	0.0650045	0.321068	0.0747275	0.035544	0.153384	0.138793	0.0650045	0.321068	45.9331	24.3402	84.5933	0.227116	0.106371	0.525385	0.122281	0.0581629	0.250992	0.227116	0.106371	0.525385
Central African Republic	2022	128.783	74.7194	219.162	0.636766	0.357198	1.19167	0.34284	0.190104	0.617753	2.53332	1.25311	4.98005	92.7235	53.7979	157.797	0.458472	0.257182	0.858	0.246845	0.136875	0.444782	1.82399	0.902237	3.58564	65.5958	38.2243	111.916	0.324339	0.179815	0.607993	0.174627	0.0972517	0.311948	1.42464	0.697082	2.82059	92.7235	53.7979	157.797	0.458472	0.257182	0.858	0.246845	0.136875	0.444782	1.82399	0.902237	3.58564
Central African Republic	2023	195.14	129.72	327.168	0.964868	0.604964	1.81413	0.519493	0.286126	0.895805	6.69077	3.86946	12.9452	140.494	93.3959	235.546	0.694675	0.435557	1.30607	0.374019	0.206006	0.644936	4.81697	2.78575	9.31975	112.81	74.162	188.734	0.557791	0.359312	1.05654	0.300319	0.163581	0.512862	4.41021	2.44102	8.63889	140.494	93.3959	235.546	0.694675	0.435557	1.30607	0.374019	0.206006	0.644936	4.81697	2.78575	9.31975
Central African Republic	2024	262.942	194.077	427.289	1.30012	0.850577	2.44465	0.699993	0.460114	1.18014	12.8283	8.02769	24.7496	189.3	139.724	307.6	0.935994	0.612354	1.75987	0.503947	0.331262	0.849564	9.23484	5.77925	17.8157	169.942	124.832	277.828	0.840277	0.549184	1.58806	0.452412	0.283191	0.767337	9.66092	5.87914	18.9013	189.3	139.724	307.6	0.935994	0.612354	1.75987	0.503947	0.331262	0.849564	9.23484	5.77925	17.8157
Central African Republic	2025	329.927	251.392	528.716	1.63132	1.12342	2.91629	0.878318	0.588542	1.4291	20.7135	12.7262	37.5046	254.753	195.475	407.846	1.25963	0.848629	2.23643	0.678194	0.456982	1.09171	17.0478	10.1607	30.7739	234.959	179.156	373.035	1.16176	0.764265	2.088	0.625499	0.407857	1.02214	17.4803	10.3118	31.5361	237.512	180.981	380.589	1.17438	0.808749	2.0993	0.632294	0.423706	1.02872	14.91	9.1606	26.9945
Central African Republic	2026	398.928	307.315	625.636	1.9725	1.31382	3.42871	1.06201	0.690991	1.68681	30.5941	18.6109	52.0115	321.975	247.398	501.888	1.592	1.04888	2.72252	0.857148	0.556269	1.3612	26.8486	15.9892	46.3148	301.594	224.932	466.055	1.49123	0.96206	2.56497	0.802892	0.505754	1.25187	27.2897	16.143	46.5315	287.169	221.237	450.322	1.41991	0.945758	2.46792	0.764489	0.497446	1.21411	22.0204	13.3953	37.4336
Central African Republic	2027	467.889	377.309	705.807	2.31348	1.61213	4.04149	1.2456	0.925098	1.95039	42.5186	28.9106	74.0911	389.537	313.86	579.85	1.92606	1.33493	3.31313	1.03701	0.787992	1.6192	38.6886	26.2306	67.0849	369.063	299.59	544.735	1.82483	1.24766	3.13579	0.982503	0.723463	1.50933	39.1389	26.3878	67.8702	336.791	271.604	507.994	1.66526	1.16046	2.90871	0.89659	0.665932	1.40372	30.6006	20.8064	53.3162
Central African Republic	2028	537.737	440.882	810.083	2.65884	1.84221	4.67203	1.43154	1.06515	2.23738	56.4894	37.7179	98.9044	458.127	377.032	680.705	2.26521	1.56582	3.93141	1.21961	0.923852	1.88005	52.5828	34.5381	91.6564	437.579	361.556	649.156	2.16361	1.4939	3.76626	1.16491	0.85072	1.79291	53.0504	34.9101	92.6734	387.045	317.35	582.984	1.91374	1.32601	3.36222	1.03037	0.76672	1.61015	40.652	27.1431	71.1675
Central African Republic	2029	608.393	494.971	908.949	3.0082	2.16593	5.31177	1.61964	1.20988	2.51394	72.532	47.4114	127.885	527.678	432.411	777.714	2.6091	1.84613	4.56112	1.40476	1.04488	2.17305	68.5595	44.1884	120.622	507.04	411.738	746.073	2.50706	1.75851	4.37814	1.34982	0.970774	2.07316	69.0486	44.5759	121.474	437.875	356.259	654.083	2.16507	1.55881	3.82226	1.16569	0.870858	1.80899	52.1926	34.1161	92.0054
Central African Republic	2030	679.762	581.527	991.548	3.36108	2.35775	5.75669	1.80963	1.34104	2.74385	90.6666	61.9946	152.934	598.297	506.773	859.137	2.95828	2.06017	5.01958	1.59276	1.19876	2.39976	86.6664	59.1975	145.511	577.314	494.526	826.941	2.85453	1.97038	4.85787	1.5369	1.13844	2.28685	87.1505	59.3699	146.562	489.211	418.54	713.474	2.41891	1.69683	4.14216	1.30236	0.965229	1.97429	65.2365	44.6061	110.025
Chad	2021	163.409	92.1705	285.575	0.197807	0.0955433	0.426245	0.513188	0.248794	0.975296	0.197807	0.0955433	0.426245	117.655	66.3627	205.614	0.142421	0.0687912	0.306897	0.369495	0.179132	0.702213	0.142421	0.0687912	0.306897	71.9001	40.555	125.653	0.087035	0.0420391	0.187548	0.225803	0.109469	0.42913	0.087035	0.0420391	0.187548	117.655	66.3627	205.614	0.142421	0.0687912	0.306897	0.369495	0.179132	0.702213	0.142421	0.0687912	0.306897
Chad	2022	329.256	207.98	522.374	0.398565	0.192031	0.769319	1.03403	0.583913	1.85159	4.28062	2.05768	8.68723	237.064	149.746	376.109	0.286966	0.138263	0.55391	0.744502	0.420418	1.33315	3.08205	1.48153	6.2548	167.75	105.92	267.012	0.203061	0.0977977	0.395001	0.52682	0.297375	0.941615	2.45511	1.18	4.98867	237.064	149.746	376.109	0.286966	0.138263	0.55391	0.744502	0.420418	1.33315	3.08205	1.48153	6.2548
Chad	2023	498.193	332.469	743.657	0.603063	0.330554	1.13512	1.56458	0.948581	2.54746	12.3084	6.8648	23.0267	358.688	239.373	535.407	0.434191	0.237994	0.81725	1.12646	0.682965	1.83409	8.86152	4.94221	16.5778	288.155	193.156	428.972	0.348812	0.196815	0.655582	0.904953	0.551103	1.49675	8.22546	4.53072	15.294	358.688	239.373	535.407	0.434191	0.237994	0.81725	1.12646	0.682965	1.83409	8.86152	4.94221	16.5778
Chad	2024	670.2	465.689	964.581	0.811278	0.469761	1.45905	2.10477	1.31562	3.46111	24.3537	14.0205	43.6801	482.51	335.28	694.417	0.584078	0.338212	1.05042	1.51532	0.947202	2.49169	17.5324	10.0935	31.4456	433.545	300.98	628.797	0.524806	0.314968	0.928351	1.36155	0.839109	2.21887	18.5439	10.5192	34.0116	482.51	335.28	694.417	0.584078	0.338212	1.05042	1.51532	0.947202	2.49169	17.5324	10.0935	31.4456
Chad	2025	844.643	625.247	1244.46	1.02244	0.577576	1.77649	2.6526	1.75625	4.461	40.4317	23.8458	70.0803	653.663	480.573	973.842	0.791259	0.443721	1.37731	2.05283	1.34923	3.47492	33.4963	19.3867	59.1212	603.745	451.377	901.233	0.730833	0.420007	1.2571	1.89606	1.27712	3.19668	34.5202	20.2067	61.8432	608.073	450.137	895.86	0.736072	0.415825	1.2789	1.90966	1.26441	3.21131	29.1052	17.167	50.4456
Chad	2026	1022.46	766.128	1454.56	1.23769	0.707379	2.07671	3.21105	2.15094	5.02644	60.6555	36.1032	101.324	827.915	618.45	1178.87	1.00219	0.571025	1.66362	2.60007	1.73633	4.02191	53.5915	31.5613	90.1605	777.047	592.275	1104.86	0.940615	0.546858	1.5439	2.44032	1.66284	3.73837	54.6353	32.397	92.9344	736.056	551.554	1047.05	0.890995	0.50926	1.49494	2.31159	1.54851	3.6182	43.6608	25.9901	72.9303
Chad	2027	1202.51	927.532	1751.08	1.45563	0.868913	2.35678	3.77647	2.64212	5.8688	85.1028	54.4875	142.623	1004.63	777.617	1470.74	1.21611	0.730204	1.96239	3.15505	2.22034	4.91359	77.909	49.8623	131.255	953.08	739.741	1395.79	1.1537	0.705741	1.88496	2.99315	2.14596	4.66321	78.9717	50.7133	134.08	865.627	667.698	1260.41	1.04784	0.625528	1.69651	2.71851	1.90205	4.22426	61.2544	39.2225	102.646
Chad	2028	1385.32	1076.36	1965.25	1.67692	1.02755	2.789	4.35059	3.12448	6.70947	113.826	75.3504	195.502	1184.19	924.011	1680.28	1.43347	0.886508	2.40952	3.71897	2.69562	5.67137	106.506	70.643	185.514	1131.96	885.648	1604.34	1.37024	0.861747	2.27479	3.55494	2.62033	5.38028	107.591	71.5107	186.558	997.179	774.796	1414.5	1.20709	0.739702	2.00749	3.13165	2.24922	4.82904	81.9232	54.238	140.697
Chad	2029	1570.87	1261.53	2235.72	1.90154	1.16479	3.16803	4.93333	3.54181	7.50741	146.89	95.6352	251.457	1366.58	1106.36	1946.22	1.65424	1.02152	2.78257	4.29174	3.10616	6.51302	139.449	90.8496	241.303	1313.65	1079.22	1869.27	1.59017	0.996466	2.64594	4.12551	3.02997	6.24504	140.558	91.7356	242.373	1130.7	908.113	1609.06	1.36871	0.838476	2.2802	3.55095	2.54957	5.40303	105.713	68.8363	180.955
Chad	2030	1759.15	1464.61	2443.78	2.12945	1.36096	3.66159	5.52462	4.1383	8.50129	184.358	120.146	334.201	1551.86	1316.56	2150.06	1.87853	1.2156	3.27046	4.87364	3.69631	7.43114	176.812	114.244	323.903	1498.08	1265.73	2071.87	1.81343	1.19012	3.13168	4.70473	3.61883	7.16739	177.933	115.314	324.983	1266.16	1054.21	1758.71	1.53268	0.979643	2.63526	3.97638	2.97882	6.11785	132.67	86.4681	240.478
Comoros	2021	0.128165	0.0988276	0.16391	0.000143102	8.96164e-05	0.000237376	0.000328103	0.000217916	0.000459613	0.000143102	8.96164e-05	0.000237376	0.0922791	0.0711559	0.118015	0.000103034	6.45238e-05	0.000170911	0.000236234	0.0001569	0.000330922	0.000103034	6.45238e-05	0.000170911	0.0563928	0.0434842	0.0721203	6.29651e-05	3.94312e-05	0.000104445	0.000144365	9.58832e-05	0.00020223	6.29651e-05	3.94312e-05	0.000104445	0.0922791	0.0711559	0.118015	0.000103034	6.45238e-05	0.000170911	0.000236234	0.0001569	0.000330922	0.000103034	6.45238e-05	0.000170911
Comoros	2022	0.258075	0.206665	0.31595	0.000288153	0.000185772	0.00042894	0.000660673	0.000455699	0.000895763	0.003314	0.00208623	0.0051892	0.185814	0.148799	0.227484	0.00020747	0.000133756	0.000308837	0.000475685	0.000328103	0.000644949	0.00238608	0.00150209	0.00373622	0.131496	0.105841	0.161293	0.000146822	9.43226e-05	0.00021888	0.000336631	0.000233382	0.000454321	0.00190182	0.00119659	0.00298188	0.185814	0.148799	0.227484	0.00020747	0.000133756	0.000308837	0.000475685	0.000328103	0.000644949	0.00238608	0.00150209	0.00373622
Comoros	2023	0.38921	0.326998	0.465545	0.000434571	0.000278389	0.000639041	0.000996379	0.000727387	0.00130587	0.00955333	0.00602084	0.0139655	0.280231	0.235438	0.335192	0.000312891	0.00020044	0.00046011	0.000717392	0.000523719	0.000940228	0.00687839	0.004335	0.0100551	0.225326	0.187566	0.269822	0.000251587	0.00016063	0.000369178	0.000576835	0.000427966	0.00074755	0.00638771	0.00400396	0.00939	0.280231	0.235438	0.335192	0.000312891	0.00020044	0.00046011	0.000717392	0.000523719	0.000940228	0.00687839	0.004335	0.0100551
Comoros	2024	0.521575	0.431763	0.619816	0.000582363	0.000389211	0.000833343	0.00133523	0.00101098	0.00173378	0.01889	0.0124434	0.0268371	0.375534	0.310869	0.446267	0.000419301	0.000280232	0.000600007	0.000961367	0.000727906	0.00124832	0.0136008	0.00895926	0.0193227	0.338056	0.276281	0.401177	0.000377454	0.0002519	0.000537544	0.000865422	0.000663376	0.0011187	0.0143964	0.00951412	0.020561	0.375534	0.310869	0.446267	0.000419301	0.000280232	0.000600007	0.000961367	0.000727906	0.00124832	0.0136008	0.00895926	0.0193227
Comoros	2025	0.668601	0.558964	0.779564	0.000746523	0.000502907	0.00107967	0.00171162	0.00127464	0.00216616	0.0326402	0.0221241	0.0470767	0.52105	0.434019	0.612141	0.000581776	0.000392787	0.00084394	0.00133389	0.000984397	0.00169198	0.0272904	0.0185997	0.0394761	0.48331	0.397931	0.565743	0.000539638	0.000366046	0.000777914	0.00123727	0.000917393	0.0015693	0.0280989	0.0191635	0.0405758	0.481392	0.402453	0.561285	0.000537496	0.000362093	0.000777359	0.00123236	0.000917741	0.00155963	0.0235009	0.0159293	0.0338951
Comoros	2026	0.817289	0.688743	0.958909	0.000912541	0.000618072	0.00131531	0.00209226	0.00155775	0.00268469	0.0498806	0.0340637	0.071275	0.668303	0.559785	0.783819	0.000746191	0.000504745	0.00107729	0.00171086	0.0012647	0.00222083	0.0444808	0.0302581	0.0639275	0.630154	0.523471	0.737942	0.000703596	0.00047873	0.00101055	0.00161319	0.00119697	0.00209662	0.0452971	0.0309067	0.0651395	0.588447	0.495894	0.690412	0.000657028	0.000445011	0.000947019	0.00150642	0.00112158	0.00193297	0.0359139	0.0245258	0.0513178
Comoros	2027	0.966801	0.83092	1.12111	0.00107948	0.00073601	0.00154362	0.00247501	0.00183055	0.00317836	0.0706445	0.04869	0.101333	0.816528	0.700852	0.94451	0.00091169	0.000621705	0.00130468	0.00209031	0.00153494	0.00271051	0.0651933	0.0449113	0.0941627	0.778149	0.669278	0.898357	0.000868839	0.000595541	0.00124246	0.00199206	0.0014668	0.00258555	0.0660166	0.0455656	0.0953852	0.696094	0.59826	0.807199	0.000777221	0.000529925	0.0011114	0.001782	0.00131799	0.00228841	0.0508638	0.0350567	0.0729596
Comoros	2028	1.11752	0.971111	1.27393	0.00124776	0.000855053	0.00177218	0.00286085	0.00215035	0.00366076	0.0949517	0.0648898	0.13418	0.966001	0.838434	1.10151	0.00107858	0.000740571	0.00153098	0.00247296	0.00185227	0.00318899	0.0894513	0.0612265	0.126366	0.92739	0.803183	1.06366	0.00103547	0.000710007	0.00146885	0.00237412	0.00178373	0.00306325	0.0902839	0.0618223	0.127499	0.80461	0.699197	0.917222	0.000898383	0.000615636	0.00127596	0.0020598	0.00154825	0.00263574	0.0683648	0.0467204	0.0966091
Comoros	2029	1.26946	1.09315	1.43951	0.00141741	0.000966872	0.00201058	0.00324983	0.00240025	0.00416052	0.12283	0.0839491	0.173125	1.11673	0.963832	1.27289	0.00124688	0.000852863	0.0017666	0.00285882	0.00209979	0.00368504	0.117283	0.0802539	0.165243	1.07786	0.926651	1.23358	0.00120348	0.000824907	0.00170368	0.00275933	0.00203081	0.00355845	0.118126	0.0808574	0.166391	0.914009	0.787065	1.03644	0.00102053	0.000696145	0.00144761	0.00233986	0.00172818	0.00299556	0.0884371	0.0604429	0.124649
Comoros	2030	1.4227	1.20946	1.60201	0.00158851	0.00107229	0.00224687	0.00364212	0.0026846	0.00466958	0.154312	0.103688	0.218507	1.26884	1.07919	1.43866	0.00141672	0.000957457	0.00200193	0.00324823	0.00238192	0.00419056	0.148728	0.0998266	0.210894	1.2296	1.04165	1.39897	0.00137291	0.000931215	0.00193878	0.00314778	0.00231227	0.00406277	0.149574	0.100521	0.211911	1.02434	0.870808	1.15344	0.00114372	0.000772048	0.00161774	0.00262231	0.0019329	0.00336207	0.111104	0.0746548	0.157324
Congo	2021	39.5691	23.2537	62.636	0.14047	0.0725211	0.265965	0.101297	0.0579586	0.182191	0.14047	0.0725211	0.265965	28.4897	16.7427	45.0979	0.101139	0.0522152	0.191495	0.0729337	0.0417302	0.131178	0.101139	0.0522152	0.191495	17.4104	10.2316	27.5598	0.0618069	0.0319093	0.117024	0.0445706	0.0255018	0.0801641	0.0618069	0.0319093	0.117024	28.4897	16.7427	45.0979	0.101139	0.0522152	0.191495	0.0729337	0.0417302	0.131178	0.101139	0.0522152	0.191495
Congo	2022	80.1028	52.8323	118.697	0.284365	0.164014	0.496937	0.205063	0.133356	0.345694	1.14754	0.659726	2.15085	57.674	38.0393	85.4619	0.204743	0.11809	0.357795	0.147645	0.0960166	0.248899	0.826232	0.475003	1.54861	40.7849	26.8273	60.7579	0.144786	0.0834581	0.254656	0.104409	0.0675365	0.174382	0.645504	0.364417	1.22643	57.674	38.0393	85.4619	0.204743	0.11809	0.357795	0.147645	0.0960166	0.248899	0.826232	0.475003	1.54861
Congo	2023	121.349	89.543	179.69	0.430789	0.255169	0.710099	0.310653	0.212128	0.515434	3.04158	1.78741	5.70973	87.3692	64.4699	129.373	0.310161	0.183719	0.51126	0.223665	0.152729	0.371098	2.18984	1.2869	4.11088	70.1435	50.9129	104.176	0.24901	0.147172	0.423941	0.179567	0.123575	0.295118	2.00505	1.15748	3.78137	87.3692	64.4699	129.373	0.310161	0.183719	0.51126	0.223665	0.152729	0.371098	2.18984	1.2869	4.11088
Congo	2024	163.354	124.099	242.569	0.579908	0.35907	0.972216	0.418187	0.301979	0.677628	5.83814	3.59909	9.7022	117.609	89.3472	174.637	0.417512	0.25852	0.69995	0.301079	0.217416	0.487852	4.20308	2.5911	6.9848	105.608	80.1304	157.281	0.374907	0.2329	0.626587	0.270355	0.185417	0.43175	4.3974	2.65354	7.37608	117.609	89.3472	174.637	0.417512	0.25852	0.69995	0.301079	0.217416	0.487852	4.20308	2.5911	6.9848
Congo	2025	208.484	158.784	294.376	0.740119	0.461756	1.20041	0.53372	0.382452	0.808086	9.7668	6.00588	16.9054	161.833	123.337	225.099	0.574507	0.359214	0.935666	0.414292	0.296242	0.614571	8.09755	4.81796	14.3872	149.639	113.975	207.465	0.531217	0.333185	0.864674	0.383075	0.263688	0.560512	8.2976	4.93511	14.7721	150.096	114.317	211.928	0.532841	0.332442	0.864212	0.384246	0.275347	0.581752	7.03113	4.32366	12.1699
Congo	2026	254.682	204.545	342.492	0.904122	0.581458	1.45345	0.651987	0.487937	0.979725	14.6884	9.31671	24.6617	207.109	166.884	276.863	0.735238	0.476896	1.19844	0.5302	0.397544	0.782356	12.9885	8.10696	22.0962	194.62	156.531	261.374	0.690902	0.450242	1.13139	0.498228	0.364955	0.723956	13.1917	8.22589	22.4256	183.35	147.257	246.559	0.650892	0.418608	1.04635	0.469375	0.35128	0.705281	10.5737	6.70677	17.753
Congo	2027	301.482	247.826	403.213	1.07026	0.720636	1.67644	0.771793	0.581641	1.15713	20.6232	13.3266	34.106	253.03	209.461	331.258	0.898255	0.595988	1.42131	0.647756	0.488937	0.956157	18.8903	12.0932	31.4925	240.346	198.263	312.914	0.85323	0.561535	1.36968	0.615287	0.46	0.896866	19.0967	12.2139	31.8904	217.034	178.41	290.258	0.770471	0.518782	1.20683	0.555607	0.418735	0.832954	14.8452	9.59291	24.5494
Congo	2028	349.14	289.264	450.894	1.23945	0.834837	1.93713	0.893799	0.701432	1.31569	27.5852	18.7673	42.4271	299.793	249.606	388.919	1.06427	0.724899	1.66899	0.767471	0.596886	1.11099	25.8188	17.5101	39.8941	286.911	239.51	371.767	1.01853	0.689906	1.58513	0.734491	0.562135	1.05075	26.03	17.6338	40.1419	251.334	208.235	324.571	0.892237	0.600986	1.39439	0.643416	0.504958	0.947047	19.8558	13.5086	30.5361
Congo	2029	397.672	324.174	517.807	1.41173	0.948314	2.19195	1.01804	0.794614	1.52419	35.5931	23.9218	54.1067	347.416	284.392	445.305	1.23333	0.834076	1.91707	0.889385	0.693105	1.31574	33.7929	22.6408	51.6999	334.327	273.533	427.771	1.18686	0.798512	1.83184	0.855878	0.657779	1.2545	34.0101	22.7682	52.0237	286.261	233.36	372.72	1.01623	0.682655	1.57783	0.732828	0.572021	1.09706	25.6186	17.2181	38.9399
Congo	2030	447.1	369.428	575.024	1.58721	1.0695	2.4673	1.14458	0.890012	1.7007	44.6671	31.0877	70.5662	395.985	328.96	503.334	1.40575	0.957148	2.18946	1.01372	0.792655	1.48867	42.8383	29.938	68.2653	382.621	317.877	482.204	1.35831	0.928623	2.10277	0.979511	0.762232	1.42617	43.0572	30.0374	68.5923	321.83	265.927	413.867	1.1425	0.76987	1.77586	0.823886	0.640678	1.22406	32.1482	22.3759	50.7859
C√¥te d'Ivoire	2021	295.427	160.201	336.372	0.370725	0.168631	0.515083	0.838864	0.428963	1.05404	0.370725	0.168631	0.515083	212.708	115.345	242.188	0.266922	0.121414	0.37086	0.603982	0.308853	0.758911	0.266922	0.121414	0.37086	129.988	70.4884	148.003	0.163119	0.0741977	0.226637	0.3691	0.188744	0.463779	0.163119	0.0741977	0.226637	212.708	115.345	242.188	0.266922	0.121414	0.37086	0.603982	0.308853	0.758911	0.266922	0.121414	0.37086
C√¥te d'Ivoire	2022	594.998	359.435	669.884	0.74665	0.38058	1.00761	1.68949	0.993537	2.09913	5.29658	2.56708	7.48823	428.399	258.793	482.316	0.537588	0.274018	0.725479	1.21644	0.715347	1.51137	3.81354	1.8483	5.39153	303.159	184.873	340.786	0.380428	0.194994	0.517274	0.860819	0.494877	1.06788	3.02	1.45681	4.27692	428.399	258.793	482.316	0.537588	0.274018	0.725479	1.21644	0.715347	1.51137	3.81354	1.8483	5.39153
C√¥te d'Ivoire	2023	899.618	579.31	966.485	1.12891	0.567438	1.45528	2.55446	1.54571	3.09543	14.8443	7.45961	19.2481	647.701	417.09	695.842	0.812785	0.408545	1.04777	1.83914	1.11289	2.22862	10.6871	5.37064	13.858	520.443	327.273	560.443	0.653093	0.328245	0.836446	1.4778	0.901715	1.77859	9.88274	4.94793	12.8262	647.701	417.09	695.842	0.812785	0.408545	1.04777	1.83914	1.11289	2.22862	10.6871	5.37064	13.858
C√¥te d'Ivoire	2024	1209.28	806.66	1271.82	1.51749	0.800988	1.94588	3.43374	2.06722	4.21051	29.0903	16.0673	37.5554	870.607	580.762	915.635	1.09251	0.576672	1.40089	2.47208	1.48832	3.03127	20.9419	11.5671	27.0359	782.555	516.449	820.2	0.982011	0.526448	1.25838	2.22206	1.30307	2.7229	22.0885	12.3271	28.6236	870.607	580.762	915.635	1.09251	0.576672	1.40089	2.47208	1.48832	3.03127	20.9419	11.5671	27.0359
C√¥te d'Ivoire	2025	1537.5	1046.08	1609.01	1.92938	1.00404	2.49842	4.36573	2.60971	5.4061	48.9603	25.8483	64.4084	1193.36	808.603	1251.67	1.49752	0.776106	1.94467	3.38854	2.01002	4.20791	40.6865	21.2787	53.926	1103.72	755.321	1166.29	1.38504	0.724966	1.79958	3.13402	1.84511	3.89395	41.8462	22.0481	55.5332	1106.85	753.1	1158.33	1.38896	0.722834	1.79858	3.1429	1.87884	3.89178	35.2436	18.6076	46.3658
C√¥te d'Ivoire	2026	1870.84	1237.68	1959.66	2.34768	1.18794	3.01735	5.31224	3.24006	6.52898	73.9009	36.7233	96.4688	1520.97	996.244	1599.07	1.90864	0.956206	2.4544	4.3188	2.63041	5.31087	65.487	32.0763	85.8088	1429.93	942.132	1511.29	1.79439	0.904268	2.30703	4.06029	2.46291	4.99198	66.6671	32.8591	87.4442	1346.75	891.002	1410.69	1.69001	0.855194	2.17202	3.8241	2.33257	4.69985	53.1928	26.4348	69.4408
C√¥te d'Ivoire	2027	2209.59	1498.31	2296.76	2.77276	1.43809	3.49661	6.27412	3.83231	7.27249	103.993	54.5573	139.39	1853.96	1252.9	1927.49	2.3265	1.20254	2.96925	5.26432	3.21261	6.03432	95.4389	49.8331	128.553	1761.46	1197.92	1839.39	2.21041	1.14978	2.86172	5.00165	3.0424	5.71031	96.6395	50.6295	130.217	1590.52	1078.58	1653.29	1.99591	1.03523	2.51703	4.51628	2.75885	5.23485	74.8467	39.2697	100.329
C√¥te d'Ivoire	2028	2553.62	1734.95	2657.8	3.20448	1.66522	4.04075	7.25099	4.63207	8.48992	139.317	73.1689	180.145	2192.23	1485.55	2294.99	2.75098	1.42585	3.50589	6.22482	4.00235	7.23166	130.623	68.3671	170.232	2098.26	1429.71	2210.43	2.63306	1.37225	3.33773	5.95801	3.82809	6.90255	131.844	69.1769	171.939	1838.06	1248.87	1913.04	2.30655	1.19868	2.90846	5.21917	3.33445	6.11075	100.263	52.6631	129.657
C√¥te d'Ivoire	2029	2902.86	1984.73	3003.82	3.64274	1.97472	4.52393	8.24266	5.24192	9.50842	179.954	98.7475	235.427	2535.72	1729.49	2635.23	3.18202	1.73154	3.99446	7.20017	4.60218	8.23017	171.12	93.6753	225.354	2440.32	1668.81	2549.38	3.0623	1.67713	3.87152	6.92928	4.42665	7.89602	172.36	94.304	227.089	2089.33	1428.6	2161.98	2.62186	1.42139	3.25625	5.93265	3.77334	6.84348	129.498	71.0693	169.433
C√¥te d'Ivoire	2030	3257.2	2247.55	3361.03	4.08738	2.2934	5.13339	9.2488	5.91732	10.5666	225.981	130.369	293.634	2884.33	1988.31	2986.68	3.61948	2.04642	4.58039	8.19003	5.26761	9.26839	217.006	125.159	283.399	2787.56	1926.79	2899.61	3.49805	1.99124	4.46794	7.91526	5.08956	8.92948	218.268	125.855	285.164	2344.24	1617.69	2418.94	2.94173	1.65068	3.69474	6.65645	4.25937	7.60466	162.608	93.8204	211.31
Democratic Republic of the Congo	2021	1143.26	860.262	1542.26	4.08945	2.47442	6.38736	2.92675	1.94676	4.18976	4.08945	2.47442	6.38736	823.149	619.388	1110.42	2.9444	1.78158	4.5989	2.10726	1.40166	3.01662	2.9444	1.78158	4.5989	503.035	378.515	678.593	1.79936	1.08874	2.81044	1.28777	0.856572	1.84349	1.79936	1.08874	2.81044	823.149	619.388	1110.42	2.9444	1.78158	4.5989	2.10726	1.40166	3.01662	2.9444	1.78158	4.5989
Democratic Republic of the Congo	2022	2308.12	1809.73	2923.13	8.25616	5.08219	12.8359	5.9088	4.15992	8.48933	37.45	22.0742	59.7141	1661.85	1303.01	2104.66	5.94444	3.65918	9.24182	4.25433	2.99514	6.11232	26.964	15.8934	42.9942	1175.63	917.121	1493.91	4.20523	2.56935	6.56724	3.00962	2.10817	4.39272	21.1413	12.4265	33.7634	1661.85	1303.01	2104.66	5.94444	3.65918	9.24182	4.25433	2.99514	6.11232	26.964	15.8934	42.9942
Democratic Republic of the Congo	2023	3495.38	2807.97	4297.17	12.503	7.97154	18.3485	8.94817	6.23962	12.8734	100.646	62.7478	151.242	2516.59	2021.68	3093.83	9.00183	5.73933	13.2105	6.44246	4.49241	9.2685	72.4607	45.1755	108.888	2020.99	1609.01	2498.45	7.22908	4.59144	10.6691	5.17374	3.58825	7.51598	66.5309	41.3302	100.769	2516.59	2021.68	3093.83	9.00183	5.73933	13.2105	6.44246	4.49241	9.2685	72.4607	45.1755	108.888
Democratic Republic of the Congo	2024	4705.4	3951.36	5732.62	16.8312	10.7172	25.0032	12.0458	8.44094	16.5061	194.244	121.527	294.984	3387.63	2844.81	4127.18	12.1176	7.71579	18.0009	8.67234	6.07712	11.8833	139.837	87.4876	212.361	3042.45	2549.74	3735.54	10.8829	6.8873	16.2928	7.78868	5.44679	10.8135	146.637	91.6346	223.333	3387.63	2844.81	4127.18	12.1176	7.71579	18.0009	8.67234	6.07712	11.8833	139.837	87.4876	212.361
Democratic Republic of the Congo	2025	6053.67	5061.55	7290.37	21.654	14.0586	32.1006	15.4974	11.6847	20.7996	330.999	210	495.075	4710.51	3918.99	5663.5	16.8495	10.9994	25.0073	12.0589	9.07065	16.1599	275.558	172.668	412.519	4358.54	3608.55	5228.58	15.5905	10.1546	23.198	11.1579	8.40446	15.2536	282.478	177.72	423.759	4358.1	3643.89	5248.32	15.5889	10.1209	23.1095	11.1567	8.41215	14.9734	238.271	151.17	356.38
Democratic Republic of the Congo	2026	7429.88	6196.41	8935.84	26.5767	17.3881	39.2098	19.0205	14.2428	25.2843	502.487	323.895	742.465	6060.02	5031.11	7322.83	21.6767	14.2681	31.9756	15.5137	11.5729	20.7202	445.966	285.835	658.301	5700.64	4714.11	6888.56	20.3912	13.3786	30.128	14.5936	10.8966	19.4915	453.019	290.984	669.757	5348.59	4460.69	6432.41	19.1319	12.5173	28.2261	13.6924	10.2534	18.2008	361.693	233.141	534.427
Democratic Republic of the Congo	2027	8828.36	7421.27	10524.6	31.579	20.5399	46.5569	22.6006	17.0392	29.921	709.403	462.989	1046.3	7432.45	6233.87	8834.03	26.5859	17.3607	39.1851	19.0271	14.3225	25.2003	651.772	426.934	960.484	7066.94	5911.5	8382.45	25.2784	16.4834	37.3061	18.0914	13.6306	24.1576	658.957	431.315	972.156	6355	5342.18	7575.85	22.7318	14.7855	33.5133	16.2688	12.266	21.5371	510.596	333.239	753.073
Democratic Republic of the Congo	2028	10252.6	8759.54	12123.7	36.6736	24.3982	52.8781	26.2467	19.8095	35.0186	952.322	648.816	1378.54	8830.45	7558.53	10390.9	31.5865	21.1593	45.3206	22.6059	17.2585	30.1051	893.574	611.595	1292.76	8458.68	7273.24	10034.5	30.2567	20.2669	43.4811	21.6542	16.5796	29.1483	900.916	616.541	1304.72	7379.86	6305.05	8726.71	26.3978	17.5618	38.062	18.8924	14.2597	25.2046	685.388	466.95	992.048
Democratic Republic of the Congo	2029	11702.9	10177.6	14009.6	41.8614	28.0215	61.1038	29.9595	22.4732	40.4345	1231.9	845.074	1817.34	10254.3	8912.67	12244.6	36.6797	24.7222	53.4057	26.2511	19.8747	35.4296	1172.03	807.622	1726.42	9876.13	8511.14	11815.6	35.3269	23.8143	51.5346	25.2829	19.0543	34.4568	1179.55	812.205	1738.34	8423.38	7325.54	10083.7	30.1304	20.1687	43.9806	21.5639	16.1764	29.1006	886.536	608.153	1307.85
Democratic Republic of the Congo	2030	13179.7	11574.5	15498.7	47.1439	31.5265	67.5986	33.7401	25.0223	45.3609	1548.81	1055.53	2200.99	11705.2	10274.6	13702.2	41.8695	28.1682	59.7629	29.9653	22.3774	40.2668	1487.9	1017.43	2108.49	11319.7	9897.47	13264.9	40.4905	27.2428	57.8554	28.9784	21.6734	39.2747	1495.52	1022.08	2120.58	9485.84	8330.14	11155	33.9308	22.6903	48.6533	24.2837	18.0106	32.6441	1114.52	759.555	1583.86
Equatorial Guinea	2021	11.2349	6.47507	19.1385	0.0983785	0.0440111	0.191008	0.0287614	0.0149111	0.0512343	0.0983785	0.0440111	0.191008	8.08913	4.66205	13.7797	0.0708325	0.031688	0.137526	0.0207082	0.010736	0.0368887	0.0708325	0.031688	0.137526	4.94336	2.84903	8.42093	0.0432865	0.0193649	0.0840436	0.012655	0.00656087	0.0225431	0.0432865	0.0193649	0.0840436	8.08913	4.66205	13.7797	0.0708325	0.031688	0.137526	0.0207082	0.010736	0.0368887	0.0708325	0.031688	0.137526
Equatorial Guinea	2022	22.7417	14.1283	37.3704	0.199138	0.0947773	0.349379	0.0582187	0.0335003	0.0970594	0.519541	0.254479	0.926858	16.374	10.1724	26.9067	0.143379	0.0682397	0.251553	0.0419175	0.0241202	0.0698828	0.37407	0.183225	0.667338	11.5792	7.23406	18.9416	0.101394	0.0486589	0.178555	0.0296428	0.017153	0.0498071	0.287259	0.139467	0.513562	16.374	10.1724	26.9067	0.143379	0.0682397	0.251553	0.0419175	0.0241202	0.0698828	0.37407	0.183225	0.667338
Equatorial Guinea	2023	34.5028	22.009	50.769	0.302123	0.161223	0.494105	0.0883271	0.057285	0.138939	1.27118	0.670478	2.16418	24.8413	15.8462	36.5521	0.217523	0.116078	0.355746	0.0635938	0.0412444	0.100032	0.915205	0.482726	1.55814	19.9366	12.8589	29.4728	0.174575	0.0928181	0.289174	0.0510378	0.0333835	0.0813693	0.826377	0.437945	1.42013	24.8413	15.8462	36.5521	0.217523	0.116078	0.355746	0.0635938	0.0412444	0.100032	0.915205	0.482726	1.55814
Equatorial Guinea	2024	46.5058	32.948	68.717	0.407228	0.244234	0.69528	0.119055	0.0769029	0.185613	2.36036	1.41671	4.26264	33.4822	23.7215	49.4721	0.293187	0.175841	0.500568	0.0857145	0.0553682	0.13363	1.6993	1.01996	3.06877	30.0461	21.7465	44.5595	0.263098	0.157839	0.459202	0.0769179	0.0492326	0.120358	1.75697	1.03662	3.20708	33.4822	23.7215	49.4721	0.293187	0.175841	0.500568	0.0857145	0.0553682	0.13363	1.6993	1.01996	3.06877
Equatorial Guinea	2025	60.8904	44.3719	88.4745	0.533187	0.326738	0.901954	0.15588	0.105212	0.245461	4.0587	2.45655	7.15414	47.5868	34.8981	69.3361	0.416694	0.254019	0.703027	0.121822	0.0827484	0.192364	3.38272	2.01075	6.05321	44.0903	32.7663	64.4673	0.386076	0.238357	0.660962	0.112871	0.0749966	0.178856	3.44209	2.03657	6.18175	43.8368	31.9456	63.6924	0.383857	0.235234	0.649335	0.112222	0.0757477	0.176706	2.92181	1.76843	5.15004
Equatorial Guinea	2026	75.5469	60.6276	104.518	0.661527	0.403477	1.09104	0.1934	0.133505	0.293986	6.17539	3.7666	10.1946	61.9766	49.4777	84.4648	0.542698	0.329274	0.888093	0.15866	0.107564	0.240847	5.4852	3.26975	9.07047	58.4215	46.9001	79.3839	0.511568	0.319036	0.845351	0.149559	0.101329	0.225685	5.54622	3.28219	9.2023	54.3863	43.647	75.2397	0.476234	0.290471	0.785426	0.139229	0.0961139	0.211627	4.44535	2.71139	7.33838
Equatorial Guinea	2027	90.4788	70.6606	119.6	0.792278	0.470246	1.30312	0.231626	0.167508	0.335551	8.71779	5.21101	15.2876	76.6493	59.2957	102.507	0.67118	0.394613	1.11965	0.196222	0.139646	0.286228	8.01404	4.71032	14.1413	73.0329	57.7331	98.8231	0.639513	0.384214	1.08397	0.186964	0.129703	0.269649	8.07656	4.78466	14.2762	65.1331	50.8684	86.0929	0.570338	0.338529	0.938028	0.166741	0.120589	0.241536	6.27514	3.75115	11.0034
Equatorial Guinea	2028	105.656	88.0014	140.827	0.925176	0.592385	1.53969	0.270479	0.196511	0.381222	11.6931	7.74458	20.6236	91.5791	75.7061	123.396	0.801913	0.515384	1.35292	0.234443	0.168151	0.331626	10.9763	7.31463	19.4561	87.9061	72.2027	120.04	0.76975	0.504835	1.3167	0.22504	0.158045	0.322749	11.0402	7.33338	19.5937	76.0555	63.3496	101.371	0.66598	0.426434	1.10826	0.194702	0.141464	0.2744	8.41631	5.57452	14.843
Equatorial Guinea	2029	121.059	99.7453	162.462	1.06005	0.663557	1.78202	0.309911	0.229707	0.43839	15.1078	9.34703	26.8037	106.747	88.2364	145.146	0.93473	0.588395	1.59208	0.273272	0.201595	0.390251	14.3783	8.90945	25.6153	103.025	85.9724	141.803	0.902137	0.568858	1.55541	0.263744	0.192095	0.381262	14.4436	8.9287	25.7558	87.1395	71.7995	116.932	0.763037	0.477654	1.28261	0.223077	0.165356	0.315531	10.8734	6.72769	19.2892
Equatorial Guinea	2030	136.671	112.433	186.667	1.19676	0.753195	2.04752	0.349878	0.263225	0.501886	18.9678	11.8841	34.3888	122.139	100.743	169.08	1.06951	0.67688	1.85461	0.312675	0.234686	0.454601	18.2262	11.4393	33.1806	118.375	98.5	165.703	1.03655	0.657115	1.81757	0.30304	0.225318	0.445521	18.2931	11.4592	33.3242	98.373	80.9287	134.344	0.861403	0.542157	1.4736	0.251835	0.189477	0.361208	13.6508	8.55326	24.7456
Eritrea	2021	7.47433	4.6848	10.8224	0.00342511	0.00181352	0.006027	0.0191343	0.0103024	0.0291806	0.00342511	0.00181352	0.006027	5.38152	3.37305	7.79212	0.00246608	0.00130574	0.00433944	0.0137767	0.00741774	0.02101	0.00246608	0.00130574	0.00433944	3.28871	2.06131	4.76185	0.00150705	0.000797951	0.00265188	0.00841909	0.00453306	0.0128394	0.00150705	0.000797951	0.00265188	5.38152	3.37305	7.79212	0.00246608	0.00130574	0.00433944	0.0137767	0.00741774	0.02101	0.00246608	0.00130574	0.00433944
Eritrea	2022	14.636	10.0453	19.7022	0.00670695	0.00399845	0.0101653	0.0374682	0.0234914	0.0537568	0.0162904	0.0092857	0.0251403	10.5379	7.23265	14.1856	0.004829	0.00287888	0.00731905	0.0269771	0.0169138	0.0387049	0.0117291	0.00668571	0.018101	7.48625	5.17885	10.0832	0.00343057	0.00202386	0.0050979	0.0191648	0.0119902	0.0276621	0.00898922	0.00509056	0.0140569	10.5379	7.23265	14.1856	0.004829	0.00287888	0.00731905	0.0269771	0.0169138	0.0387049	0.0117291	0.00668571	0.018101
Eritrea	2023	21.7653	15.9303	29.5902	0.00997396	0.00624302	0.0154788	0.0557192	0.0384506	0.0776413	0.0383241	0.023553	0.0581582	15.6709	11.4697	21.3048	0.0071812	0.00449495	0.0111447	0.0401176	0.0276843	0.0559013	0.027593	0.016958	0.0418732	12.672	9.31333	17.4763	0.00580693	0.00364263	0.00894594	0.0324402	0.0222255	0.0458559	0.0249337	0.0151328	0.0380766	15.6709	11.4697	21.3048	0.0071812	0.00449495	0.0111447	0.0401176	0.0276843	0.0559013	0.027593	0.016958	0.0418732
Eritrea	2024	28.8819	22.2541	36.975	0.0132351	0.00887065	0.0191052	0.0739376	0.0519867	0.0984341	0.0694933	0.0451909	0.105383	20.7946	16.0227	26.6215	0.00952913	0.00638679	0.0137555	0.0532342	0.0374299	0.070871	0.0500339	0.0325367	0.0758738	18.85	14.3285	23.9784	0.00863801	0.00572017	0.0127227	0.048256	0.0330948	0.0645956	0.0518892	0.0332025	0.0798223	20.7946	16.0227	26.6215	0.00952913	0.00638679	0.0137555	0.0532342	0.0374299	0.070871	0.0500339	0.0325367	0.0758738
Eritrea	2025	36.4776	28.5822	46.4313	0.0167158	0.0108583	0.0238972	0.0933826	0.062838	0.122543	0.112342	0.0724885	0.160895	28.4835	22.0262	36.5545	0.0130526	0.00832618	0.0186011	0.0729178	0.0484248	0.0964896	0.0932903	0.0581881	0.13532	26.4901	20.0184	33.6362	0.0121391	0.00788535	0.0171751	0.0678146	0.0440106	0.0891664	0.0949568	0.059556	0.139301	26.2632	20.5788	33.4295	0.0120351	0.00781781	0.0172056	0.0672337	0.0452425	0.0882276	0.0808831	0.0521892	0.11584
Eritrea	2026	44.0435	35.1977	55.2702	0.0201829	0.0135462	0.028593	0.112751	0.0796512	0.148118	0.164818	0.107282	0.238712	36.0579	28.44	45.2724	0.0165236	0.0110172	0.0233024	0.0923083	0.0652524	0.123153	0.145804	0.0939179	0.212841	34.0596	26.821	42.4815	0.0156078	0.0104432	0.0221305	0.0871925	0.0608314	0.116936	0.147447	0.0950179	0.215599	31.7101	25.3415	39.793	0.0145312	0.00975287	0.0205862	0.0811779	0.0573472	0.10664	0.118662	0.0772391	0.171864
Eritrea	2027	51.7827	41.3865	63.8269	0.0237294	0.0159115	0.0329944	0.132564	0.0909885	0.174382	0.227062	0.147956	0.323976	43.7476	34.7891	54.0295	0.0200473	0.0133699	0.0280569	0.111994	0.076484	0.147596	0.208026	0.133659	0.299377	41.6997	32.7309	52.1144	0.0191089	0.0127829	0.0268653	0.106751	0.0719589	0.141407	0.209641	0.134677	0.302713	37.2818	29.7973	45.9528	0.0170844	0.0114557	0.0237549	0.0954414	0.0655094	0.125547	0.163473	0.106521	0.233248
Eritrea	2028	59.6442	49.6516	73.3038	0.027332	0.0182078	0.0383529	0.152689	0.109159	0.199448	0.29928	0.199389	0.430833	51.5214	42.8287	63.7449	0.0236097	0.0156397	0.0333633	0.131895	0.0941176	0.173978	0.280121	0.185012	0.404775	49.4178	40.4516	62.0797	0.0226457	0.0151681	0.0321384	0.126509	0.0898541	0.169234	0.281692	0.186307	0.407441	42.9414	35.7475	52.7753	0.0196779	0.0131089	0.0276126	0.10993	0.078591	0.143592	0.215463	0.143545	0.310175
Eritrea	2029	67.6414	55.9524	83.9169	0.0309967	0.021125	0.0430071	0.173162	0.125721	0.225775	0.381644	0.244758	0.535369	59.4001	48.6361	73.7136	0.0272201	0.0182351	0.0379463	0.152064	0.110828	0.198842	0.362272	0.230224	0.509033	57.2399	46.2008	70.9654	0.0262302	0.0174259	0.036687	0.146534	0.10608	0.190728	0.363789	0.231479	0.51163	48.6985	40.2835	60.4157	0.0223161	0.0152089	0.0309632	0.124668	0.0905141	0.162544	0.274756	0.176206	0.385431
Eritrea	2030	75.7721	62.7791	91.8676	0.0347226	0.0241156	0.0473775	0.193977	0.141769	0.251308	0.474317	0.319882	0.653825	67.3716	55.3215	82.7773	0.030873	0.0211967	0.0422184	0.172471	0.126324	0.22386	0.454545	0.305047	0.626803	65.1796	52.8483	81.0364	0.0298685	0.0203754	0.040941	0.16686	0.121769	0.21729	0.456119	0.306347	0.629155	54.5517	45.1981	66.1387	0.0249983	0.0173619	0.0341094	0.139652	0.102067	0.180924	0.341469	0.230284	0.470705
Eswatini	2021	0.00150794	0.00114951	0.00190709	4.13835e-07	2.66288e-07	6.3307e-07	3.86033e-06	2.53788e-06	5.44169e-06	4.13835e-07	2.66288e-07	6.3307e-07	0.00108572	0.000827645	0.0013731	2.97961e-07	1.91727e-07	4.55811e-07	2.77944e-06	1.82727e-06	3.91801e-06	2.97961e-07	1.91727e-07	4.55811e-07	0.000663495	0.000505783	0.000839119	1.82087e-07	1.17167e-07	2.78551e-07	1.69855e-06	1.11667e-06	2.39434e-06	1.82087e-07	1.17167e-07	2.78551e-07	0.00108572	0.000827645	0.0013731	2.97961e-07	1.91727e-07	4.55811e-07	2.77944e-06	1.82727e-06	3.91801e-06	2.97961e-07	1.91727e-07	4.55811e-07
Eswatini	2022	0.00295559	0.0023747	0.00370855	8.11122e-07	5.341e-07	1.20881e-06	7.5663e-06	5.42298e-06	1.0342e-05	3.04381e-06	1.91893e-06	4.55908e-06	0.00212802	0.00170978	0.00267015	5.84008e-07	3.84552e-07	8.70345e-07	5.44774e-06	3.90454e-06	7.44624e-06	2.19154e-06	1.38163e-06	3.28254e-06	0.00151157	0.00121549	0.00190526	4.1483e-07	2.70939e-07	6.16785e-07	3.86962e-06	2.759e-06	5.31317e-06	1.70979e-06	1.06782e-06	2.56278e-06	0.00212802	0.00170978	0.00267015	5.84008e-07	3.84552e-07	8.70345e-07	5.44774e-06	3.90454e-06	7.44624e-06	2.19154e-06	1.38163e-06	3.28254e-06
Eswatini	2023	0.00438098	0.0036377	0.0054846	1.2023e-06	7.6933e-07	1.70297e-06	1.12153e-05	8.22582e-06	1.52949e-05	7.81108e-06	4.87348e-06	1.10226e-05	0.0031543	0.00261914	0.00394891	8.65657e-07	5.53918e-07	1.22614e-06	8.07501e-06	5.92259e-06	1.10123e-05	5.62398e-06	3.50891e-06	7.9363e-06	0.00255252	0.00211608	0.00320251	7.00506e-07	4.45006e-07	9.89511e-07	6.53446e-06	4.80264e-06	8.93081e-06	5.15875e-06	3.19264e-06	7.32153e-06	0.0031543	0.00261914	0.00394891	8.65657e-07	5.53918e-07	1.22614e-06	8.07501e-06	5.92259e-06	1.10123e-05	5.62398e-06	3.50891e-06	7.9363e-06
Eswatini	2024	0.00578727	0.00485956	0.00691957	1.58824e-06	1.02837e-06	2.24732e-06	1.48154e-05	1.08882e-05	1.92552e-05	1.46836e-05	9.47765e-06	2.1417e-05	0.00416683	0.00349888	0.00498209	1.14353e-06	7.40423e-07	1.61807e-06	1.06671e-05	7.8395e-06	1.38638e-05	1.05722e-05	6.82391e-06	1.54202e-05	0.00378463	0.00317129	0.0046094	1.03864e-06	6.71735e-07	1.48007e-06	9.68865e-06	7.02402e-06	1.24157e-05	1.11095e-05	7.17725e-06	1.6329e-05	0.00416683	0.00349888	0.00498209	1.14353e-06	7.40423e-07	1.61807e-06	1.06671e-05	7.8395e-06	1.38638e-05	1.05722e-05	6.82391e-06	1.54202e-05
Eswatini	2025	0.00767828	0.00635896	0.00897474	2.1072e-06	1.34064e-06	2.97299e-06	1.96564e-05	1.45414e-05	2.5366e-05	2.67108e-05	1.67301e-05	3.81814e-05	0.00608955	0.00500847	0.00716382	1.6712e-06	1.05838e-06	2.37434e-06	1.55893e-05	1.15495e-05	2.0244e-05	2.27094e-05	1.41485e-05	3.23491e-05	0.00570483	0.00463717	0.00675037	1.56562e-06	9.8923e-07	2.21452e-06	1.46044e-05	1.07315e-05	1.88123e-05	2.32126e-05	1.4479e-05	3.32044e-05	0.00552836	0.00457845	0.00646181	1.51719e-06	9.6526e-07	2.14055e-06	1.41526e-05	1.04698e-05	1.82635e-05	1.92317e-05	1.20457e-05	2.74906e-05
Eswatini	2026	0.00953197	0.00780225	0.0110083	2.61592e-06	1.64191e-06	3.72845e-06	2.44018e-05	1.82585e-05	3.07827e-05	4.141e-05	2.54548e-05	5.9344e-05	0.00796297	0.00646841	0.00926242	2.18533e-06	1.36314e-06	3.13713e-06	2.03852e-05	1.52539e-05	2.57241e-05	3.74624e-05	2.29077e-05	5.41797e-05	0.00758165	0.00610054	0.00876782	2.08068e-06	1.29459e-06	2.96961e-06	1.9409e-05	1.44719e-05	2.43224e-05	3.79551e-05	2.32313e-05	5.46791e-05	0.00686302	0.00561762	0.00792599	1.88346e-06	1.18218e-06	2.68449e-06	1.75693e-05	1.31461e-05	2.21636e-05	2.98152e-05	1.83275e-05	4.27277e-05
Eswatini	2027	0.011395	0.0095852	0.0133471	3.12722e-06	2.04029e-06	4.5206e-06	2.91713e-05	2.14386e-05	3.63434e-05	5.88131e-05	3.89632e-05	8.62582e-05	0.00983486	0.00825818	0.0116104	2.69905e-06	1.76312e-06	3.93238e-06	2.51772e-05	1.84983e-05	3.15943e-05	5.49085e-05	3.64442e-05	8.11498e-05	0.00944863	0.00788584	0.0111106	2.59305e-06	1.69372e-06	3.76308e-06	2.41885e-05	1.76782e-05	3.02543e-05	5.53916e-05	3.67616e-05	8.16381e-05	0.00820443	0.00690135	0.00960995	2.2516e-06	1.46901e-06	3.25483e-06	2.10033e-05	1.54358e-05	2.61672e-05	4.23454e-05	2.80535e-05	6.21059e-05
Eswatini	2028	0.0132608	0.0112235	0.0151207	3.63925e-06	2.38793e-06	5.12129e-06	3.39476e-05	2.47464e-05	4.24311e-05	7.89382e-05	5.26106e-05	0.000110126	0.0117016	0.00989638	0.0133837	3.21134e-06	2.11082e-06	4.53297e-06	2.9956e-05	2.18083e-05	3.75158e-05	7.50559e-05	5.01051e-05	0.000104899	0.0113089	0.00951826	0.0128763	3.10357e-06	2.04023e-06	4.36114e-06	2.89507e-05	2.09762e-05	3.63066e-05	7.55265e-05	5.0414e-05	0.00010538	0.00954777	0.00808095	0.0108869	2.62026e-06	1.71931e-06	3.68732e-06	2.44423e-05	1.78174e-05	3.05504e-05	5.68355e-05	3.78796e-05	7.9291e-05
Eswatini	2029	0.0151355	0.0128618	0.0171336	4.15373e-06	2.7317e-06	5.80305e-06	3.87468e-05	2.77585e-05	4.80737e-05	0.000101806	6.78998e-05	0.00014022	0.0135704	0.0114888	0.0153894	3.72421e-06	2.45362e-06	5.21228e-06	3.47401e-05	2.4807e-05	4.326e-05	9.79258e-05	6.53971e-05	0.000135139	0.0131704	0.0110911	0.0149797	3.61444e-06	2.38172e-06	5.03767e-06	3.37162e-05	2.39612e-05	4.20961e-05	9.83817e-05	6.56962e-05	0.000135592	0.0108975	0.00926053	0.0123362	2.99068e-06	1.96682e-06	4.1782e-06	2.78977e-05	1.99861e-05	3.46131e-05	7.33e-05	4.88879e-05	0.000100959
Eswatini	2030	0.0170189	0.0145437	0.0191722	4.67062e-06	3.12402e-06	6.44834e-06	4.35685e-05	3.13383e-05	5.3889e-05	0.000127417	8.51054e-05	0.000176774	0.015439	0.0131578	0.0174187	4.23703e-06	2.83984e-06	5.83788e-06	3.95239e-05	2.83592e-05	4.89087e-05	0.0001235	8.24153e-05	0.000171318	0.0150355	0.0127565	0.0170103	4.1263e-06	2.76201e-06	5.67643e-06	3.84909e-05	2.75058e-05	4.76657e-05	0.000123962	8.27194e-05	0.00017195	0.0122536	0.0104715	0.013804	3.36285e-06	2.2493e-06	4.6428e-06	3.13693e-05	2.25636e-05	3.88001e-05	9.17401e-05	6.12759e-05	0.000127277
Ethiopia	2021	122.944	66.4626	183.742	0.155995	0.0746577	0.272007	0.314738	0.137646	0.515211	0.155995	0.0746577	0.272007	88.52	47.853	132.294	0.112316	0.0537536	0.195845	0.226611	0.0991053	0.370952	0.112316	0.0537536	0.195845	54.0956	29.2435	80.8463	0.0686379	0.0328494	0.119683	0.138485	0.0605644	0.226693	0.0686379	0.0328494	0.119683	88.52	47.853	132.294	0.112316	0.0537536	0.195845	0.226611	0.0991053	0.370952	0.112316	0.0537536	0.195845
Ethiopia	2022	247.26	149.289	357.039	0.313729	0.159392	0.523573	0.632985	0.328213	0.929058	1.13777	0.560774	2.023	178.027	107.488	257.068	0.225885	0.114762	0.376973	0.455749	0.236313	0.668922	0.819197	0.403758	1.45656	126.006	76.6016	181.073	0.15988	0.0818784	0.270111	0.322577	0.168409	0.478716	0.637841	0.308161	1.13981	178.027	107.488	257.068	0.225885	0.114762	0.376973	0.455749	0.236313	0.668922	0.819197	0.403758	1.45656
Ethiopia	2023	372.976	241.477	524.057	0.473242	0.248618	0.788655	0.95482	0.500108	1.37041	2.9546	1.36589	5.16755	268.542	173.863	377.318	0.340733	0.179004	0.567828	0.687467	0.360077	0.986689	2.1273	0.983434	3.72059	215.935	140.567	306.872	0.273985	0.139	0.463054	0.552795	0.291119	0.801948	1.94393	0.881437	3.42425	268.542	173.863	377.318	0.340733	0.179004	0.567828	0.687467	0.360077	0.986689	2.1273	0.983434	3.72059
Ethiopia	2024	499.974	353.79	682.171	0.63438	0.363755	1.04794	1.27993	0.732711	1.78413	5.6157	3.14809	9.44874	359.977	254.727	491.156	0.456749	0.2619	0.754504	0.921542	0.527548	1.28456	4.04322	2.26658	6.80293	324.026	233.539	440.995	0.411133	0.233866	0.683719	0.829507	0.489651	1.19973	4.22581	2.35271	7.09472	359.977	254.727	491.156	0.456749	0.2619	0.754504	0.921542	0.527548	1.28456	4.04322	2.26658	6.80293
Ethiopia	2025	632.969	467.521	832.954	0.803127	0.47672	1.2699	1.6204	1.07159	2.24291	9.26572	5.6001	14.2679	491.512	362.858	646.443	0.623644	0.373804	0.973399	1.25827	0.85934	1.75199	7.67602	4.65679	11.8257	455.252	329.356	609.686	0.577635	0.345526	0.902003	1.16544	0.800532	1.6506	7.86085	4.75379	12.1341	455.729	336.61	599.714	0.578241	0.343232	0.91431	1.16667	0.771532	1.61485	6.67112	4.03195	10.2725
Ethiopia	2026	767.082	593.805	994.5	0.973293	0.586266	1.51955	1.96373	1.33982	2.64944	13.81	8.14105	21.6956	624.251	483.948	806.157	0.792066	0.482353	1.23826	1.59808	1.10464	2.15311	12.2036	6.92194	19.3224	587.726	445.846	769.145	0.745723	0.453863	1.16391	1.50458	1.05051	2.06218	12.391	7.01135	19.6786	552.285	427.53	716.018	0.700753	0.422101	1.09405	1.41385	0.964656	1.90753	9.94277	5.86133	15.6201
Ethiopia	2027	902.059	713.905	1136.86	1.14456	0.710789	1.76679	2.30927	1.63553	3.16191	19.2556	12.1388	31.4744	758.019	588.645	959.834	0.961794	0.606004	1.50299	1.94053	1.3629	2.67616	17.6341	10.9084	29.0787	721.297	563.048	920.231	0.9152	0.577355	1.44097	1.84652	1.30364	2.56574	17.8239	10.9991	29.4391	649.461	513.998	818.507	0.824053	0.51175	1.27203	1.66262	1.17755	2.27647	13.8633	8.73951	22.6601
Ethiopia	2028	1037.85	843.095	1297.72	1.31685	0.830563	2.03208	2.65689	1.85802	3.61825	25.6081	15.9996	41.2657	892.742	722.085	1128.01	1.13273	0.718563	1.76633	2.28542	1.60517	3.14506	23.9733	14.98	38.8501	855.853	688.33	1088.24	1.08593	0.690388	1.70405	2.19098	1.57033	3.03418	24.1653	15.1104	39.2146	747.218	607.009	934.313	0.94809	0.59798	1.46302	1.91288	1.33774	2.60501	18.4367	11.5191	29.709
Ethiopia	2029	1174.35	963.003	1469.98	1.49005	0.955369	2.23766	3.00634	2.1287	4.07568	32.8728	21.613	49.8118	1028.32	830.12	1277.33	1.30475	0.84914	1.97017	2.63249	1.87418	3.56522	31.2263	20.5862	47.3786	991.279	791.265	1239.84	1.25776	0.820232	1.90768	2.53767	1.82813	3.42393	31.4204	20.718	47.7468	845.491	693.334	1058.32	1.07278	0.68783	1.61102	2.16446	1.53261	2.93429	23.6667	15.5604	35.8614
Ethiopia	2030	1311.5	1056.42	1615.1	1.66407	1.05964	2.44028	3.35745	2.36372	4.49841	41.0541	27.097	59.4388	1164.67	922.803	1421.39	1.47776	0.952828	2.17132	2.98154	2.08706	3.98516	39.3979	25.6977	57.3172	1127.48	888.78	1383.74	1.43057	0.923798	2.10857	2.88634	2.02547	3.84326	39.5934	25.8938	57.5894	944.23	760.585	1162.8	1.19806	0.762895	1.75688	2.41723	1.70181	3.23861	29.5565	19.5085	42.7919
Gabon	2021	14.4077	7.55867	24.455	0.104485	0.0461458	0.205216	0.0368837	0.0190233	0.0688648	0.104485	0.0461458	0.205216	10.3735	5.44224	17.6076	0.0752289	0.033225	0.147755	0.0265563	0.0136968	0.0495827	0.0752289	0.033225	0.147755	6.33939	3.32582	10.7602	0.0459732	0.0203042	0.090295	0.0162288	0.00837024	0.0303005	0.0459732	0.0203042	0.090295	10.3735	5.44224	17.6076	0.0752289	0.033225	0.147755	0.0265563	0.0136968	0.0495827	0.0752289	0.033225	0.147755
Gabon	2022	28.6414	17.5123	46.6041	0.207707	0.0965837	0.367123	0.073322	0.0428898	0.124579	0.527616	0.24031	0.983714	20.6218	12.6089	33.5549	0.149549	0.0695403	0.264329	0.0527918	0.0308807	0.0896972	0.379884	0.173023	0.708274	14.6193	8.8203	24.0752	0.106019	0.049624	0.186293	0.0374254	0.0220365	0.064481	0.291591	0.13172	0.549977	20.6218	12.6089	33.5549	0.149549	0.0695403	0.264329	0.0527918	0.0308807	0.0896972	0.379884	0.173023	0.708274
Gabon	2023	42.753	29.8415	66.1254	0.310045	0.171158	0.537979	0.109448	0.0732629	0.181746	1.26598	0.748729	2.36516	30.7815	21.4854	47.609	0.223227	0.123232	0.38733	0.0788005	0.0527486	0.130852	0.91147	0.539067	1.70284	24.8368	17.7328	39.6106	0.180117	0.101708	0.316362	0.0635823	0.0425043	0.107771	0.824163	0.495427	1.55438	30.7815	21.4854	47.609	0.223227	0.123232	0.38733	0.0788005	0.0527486	0.130852	0.91147	0.539067	1.70284
Gabon	2024	56.7431	40.0254	86.1463	0.411501	0.244062	0.699182	0.145262	0.0973989	0.232727	2.31681	1.34145	4.03467	40.853	28.8173	62.0214	0.296266	0.175719	0.503374	0.104584	0.0701248	0.167551	1.66797	0.965788	2.90466	36.9755	24.9368	56.9862	0.268147	0.159133	0.455137	0.0946574	0.0606819	0.151373	1.73046	0.97386	3.08679	40.853	28.8173	62.0214	0.296266	0.175719	0.503374	0.104584	0.0701248	0.167551	1.66797	0.965788	2.90466
Gabon	2025	72.2231	51.2655	102.704	0.523762	0.29704	0.847261	0.184891	0.127728	0.282034	3.82861	2.00524	6.46579	56.4707	39.3779	81.1601	0.409526	0.228162	0.665989	0.144565	0.0981103	0.220171	3.18631	1.63323	5.39717	52.6073	36.0316	76.4615	0.381508	0.208773	0.629603	0.134675	0.089773	0.203909	3.24762	1.64621	5.54249	51.9964	36.9091	73.9397	0.377078	0.213857	0.609972	0.133111	0.0919593	0.20304	2.75625	1.44364	4.65473
Gabon	2026	87.409	66.3764	120.094	0.63389	0.384596	1.05811	0.223767	0.160287	0.34185	5.68018	3.46496	9.91668	71.8217	54.6076	99.0612	0.520851	0.316405	0.872758	0.183864	0.128261	0.280507	5.04328	3.096	8.80786	68.0288	51.3137	94.1096	0.493345	0.29732	0.838198	0.174154	0.119165	0.264481	5.10422	3.10891	8.97417	62.9273	47.7867	86.4553	0.456349	0.276884	0.761725	0.161094	0.115396	0.246089	4.08903	2.49442	7.13848
Gabon	2027	102.901	77.7139	142.687	0.74624	0.450287	1.2229	0.263427	0.192934	0.405993	7.8698	4.75238	13.4384	87.3552	65.9956	121.204	0.6335	0.382389	1.04423	0.223629	0.160869	0.344735	7.23809	4.38672	12.3418	83.4935	62.4857	117.411	0.605495	0.363105	1.00789	0.213743	0.151534	0.328376	7.29827	4.39955	12.5276	74.0779	55.9476	102.715	0.537213	0.324169	0.88034	0.18964	0.138896	0.29225	5.66502	3.42113	9.67278
Gabon	2028	118.455	98.0608	162.057	0.859035	0.537706	1.39068	0.303245	0.22393	0.453795	10.4024	6.81258	17.8518	102.895	83.8061	139.243	0.746196	0.470972	1.21906	0.263412	0.193008	0.399884	9.77348	6.41383	16.889	98.9558	80.3387	134.171	0.717628	0.458441	1.17661	0.253327	0.184325	0.386551	9.83136	6.45355	16.9877	85.272	70.5909	116.654	0.618392	0.387093	1.00109	0.218296	0.161207	0.326647	7.48778	4.90406	12.8497
Gabon	2029	134.088	109.26	183.784	0.972403	0.593357	1.54227	0.343264	0.253434	0.521054	13.2799	8.22192	21.6765	118.467	96.213	161.602	0.859122	0.526301	1.35714	0.303275	0.222338	0.459529	12.6511	7.82269	20.958	114.453	92.8326	157.382	0.830016	0.513476	1.31992	0.293001	0.213527	0.442567	12.7057	7.86045	21.0194	96.5222	78.6535	132.284	0.699979	0.427146	1.11014	0.247097	0.182442	0.375039	9.55858	5.91839	15.6014
Gabon	2030	149.775	121.739	206.279	1.08617	0.688857	1.75324	0.383423	0.290286	0.567475	16.5019	10.7832	26.7811	133.993	108.561	185.313	0.971714	0.621106	1.56594	0.343021	0.255809	0.504833	15.8644	10.3805	25.905	129.987	105.185	178.862	0.942666	0.608345	1.52901	0.332767	0.250433	0.493109	15.9217	10.3995	25.945	107.811	87.6339	148.472	0.781843	0.495875	1.26194	0.275995	0.208966	0.408438	11.8771	7.76069	19.2739
Gambia	2021	7.68626	5.36294	11.3607	0.00867542	0.00423939	0.0144144	0.0435179	0.0262964	0.0703335	0.00867542	0.00423939	0.0144144	5.53411	3.86131	8.17968	0.00624631	0.00305236	0.0103784	0.0313329	0.0189334	0.0506401	0.00624631	0.00305236	0.0103784	3.38196	2.35969	4.99869	0.00381719	0.00186533	0.00634235	0.0191479	0.0115704	0.0309467	0.00381719	0.00186533	0.00634235	5.53411	3.86131	8.17968	0.00624631	0.00305236	0.0103784	0.0313329	0.0189334	0.0506401	0.00624631	0.00305236	0.0103784
Gambia	2022	15.4881	11.7875	21.8915	0.0174813	0.0100089	0.028548	0.08769	0.05905	0.137111	0.0622706	0.0368247	0.103992	11.1514	8.48698	15.7619	0.0125865	0.00720639	0.0205546	0.0631368	0.042516	0.09872	0.0448348	0.0265138	0.0748745	7.89083	6.02005	11.0829	0.00890632	0.00520273	0.0145096	0.0446761	0.0299156	0.0701337	0.0348873	0.0203407	0.0585158	11.1514	8.48698	15.7619	0.0125865	0.00720639	0.0205546	0.0631368	0.042516	0.09872	0.0448348	0.0265138	0.0748745
Gambia	2023	23.4146	18.2597	31.4104	0.0264278	0.0159807	0.0408121	0.132568	0.0928866	0.187927	0.161478	0.0965147	0.248811	16.8582	13.1468	22.6149	0.0190277	0.0115059	0.0293841	0.0954471	0.0668772	0.135303	0.11626	0.0694881	0.179139	13.5462	10.5132	18.1413	0.0152894	0.00927368	0.0232437	0.0766953	0.0536289	0.108844	0.106163	0.0631178	0.164995	16.8582	13.1468	22.6149	0.0190277	0.0115059	0.0293841	0.0954471	0.0668772	0.135303	0.11626	0.0694881	0.179139
Gambia	2024	31.4635	25.6269	40.2875	0.0355126	0.0207833	0.055216	0.178139	0.132075	0.25005	0.307015	0.170715	0.466516	22.6527	18.4506	29.0055	0.0255679	0.0149633	0.0397536	0.128254	0.0950913	0.180026	0.221035	0.122906	0.335864	20.3646	16.581	26.5416	0.0229853	0.013209	0.0354444	0.1153	0.0857602	0.16142	0.230812	0.126617	0.351067	22.6527	18.4506	29.0055	0.0255679	0.0149633	0.0397536	0.128254	0.0950913	0.180026	0.221035	0.122906	0.335864
Gambia	2025	40.5224	34.425	51.3146	0.0457373	0.026738	0.0679327	0.229428	0.170449	0.316241	0.521318	0.306248	0.830133	31.5753	26.5734	40.4391	0.0356388	0.0207589	0.0536802	0.178772	0.132169	0.246496	0.434014	0.253159	0.701003	29.2516	24.5324	38.6002	0.0330161	0.0193415	0.0505514	0.165616	0.122001	0.231096	0.443929	0.257986	0.720701	29.174	24.7844	36.9435	0.0329285	0.0192501	0.048908	0.165177	0.122717	0.227673	0.375305	0.220475	0.59763
Gambia	2026	49.712	42.6665	62.5197	0.0561096	0.0337168	0.0841907	0.281458	0.204015	0.386668	0.788851	0.487206	1.25117	40.6275	34.9126	51.3321	0.045856	0.0276457	0.0697188	0.230024	0.165031	0.315325	0.700173	0.433282	1.12001	38.2711	32.5621	48.0246	0.0431963	0.0262083	0.0665466	0.216682	0.153234	0.294595	0.710259	0.438194	1.14004	35.7891	30.7171	45.0095	0.0403948	0.0242737	0.0606112	0.202629	0.14688	0.278362	0.567884	0.350735	0.900712
Gambia	2027	59.0278	50.3941	74.9478	0.0666242	0.0391412	0.100093	0.334202	0.252821	0.453904	1.11039	0.651986	1.79774	49.8095	42.3931	63.5963	0.0562196	0.0329805	0.0854072	0.28201	0.213265	0.381019	1.02036	0.597242	1.67567	47.4221	39.7204	60.0343	0.0535249	0.031524	0.0823245	0.268493	0.20131	0.361029	1.03062	0.602239	1.6881	42.4945	36.2794	53.9552	0.0479632	0.0281782	0.0720576	0.240594	0.182012	0.326756	0.799323	0.469344	1.29412
Gambia	2028	68.4701	58.5705	85.5556	0.0772817	0.0454918	0.11345	0.387662	0.286407	0.523995	1.48665	0.876339	2.3216	59.1207	49.959	74.0435	0.0667291	0.0392434	0.0998508	0.334728	0.245248	0.452804	1.39531	0.820794	2.19775	56.7028	47.8302	70.3814	0.064	0.0377683	0.0969281	0.321038	0.232621	0.431046	1.40574	0.825877	2.21038	49.2906	42.1643	61.5902	0.0556339	0.0327491	0.0816705	0.279072	0.206187	0.377196	1.07014	0.63082	1.67116
Gambia	2029	78.0362	66.2688	97.3281	0.0880789	0.0514711	0.129017	0.441823	0.324331	0.594108	1.91837	1.11454	2.94497	68.5589	58.1139	85.7985	0.0773819	0.0451372	0.115231	0.388165	0.282612	0.521947	1.82574	1.05822	2.81938	66.1105	56.1907	82.7506	0.0746184	0.0436435	0.112271	0.374303	0.269823	0.499911	1.83633	1.06338	2.83222	56.1754	47.705	70.0629	0.0634047	0.0370525	0.0928734	0.318052	0.233483	0.427651	1.38084	0.802256	2.11977
Gambia	2030	87.722	75.7143	107.614	0.0990111	0.0588377	0.14676	0.496662	0.374929	0.671906	2.40623	1.44596	3.74309	78.1199	67.4906	95.9324	0.0881733	0.0524201	0.132792	0.442297	0.332662	0.60311	2.31235	1.38888	3.61581	75.6417	65.544	93.4296	0.0853762	0.0509081	0.129796	0.428266	0.319716	0.580097	2.3231	1.39412	3.62883	63.1459	54.5025	77.4652	0.0712723	0.0423541	0.105642	0.357518	0.2699	0.483635	1.73193	1.04076	2.69412
Ghana	2021	161.223	103.99	237.661	1.77912	0.994812	2.99889	0.41273	0.246025	0.669449	1.77912	0.994812	2.99889	116.08	74.873	171.116	1.28097	0.716265	2.1592	0.297166	0.177138	0.482003	1.28097	0.716265	2.1592	70.938	45.7557	104.571	0.782813	0.437717	1.31951	0.181601	0.108251	0.294558	0.782813	0.437717	1.31951	116.08	74.873	171.116	1.28097	0.716265	2.1592	0.297166	0.177138	0.482003	1.28097	0.716265	2.1592
Ghana	2022	325.152	233.351	445.753	3.58811	2.27685	5.67821	0.83239	0.564707	1.26528	10.5668	6.3098	17.7569	234.11	168.013	320.942	2.58344	1.63934	4.08831	0.59932	0.406589	0.911004	7.6081	4.54305	12.785	165.638	117.356	227.062	1.82785	1.16139	2.89844	0.424034	0.290434	0.64248	5.87596	3.47832	9.99746	234.11	168.013	320.942	2.58344	1.63934	4.08831	0.59932	0.406589	0.911004	7.6081	4.54305	12.785
Ghana	2023	490.787	369.411	656.007	5.41593	3.38048	8.41617	1.25642	0.869078	1.77251	26.4705	16.3597	42.8871	353.36	265.972	472.314	3.89939	2.43391	6.05952	0.904602	0.625729	1.27617	19.0581	11.7786	30.8777	284.026	215.111	381.117	3.13427	1.95054	4.90646	0.727106	0.507102	1.03999	17.3006	10.6098	28.3986	353.36	265.972	472.314	3.89939	2.43391	6.05952	0.904602	0.625729	1.27617	19.0581	11.7786	30.8777
Ghana	2024	658.116	509.689	864.518	7.26243	4.40562	11.3577	1.68478	1.20749	2.36555	49.563	29.1463	85.6109	473.824	366.965	622.423	5.22873	3.17193	8.17718	1.21299	0.869362	1.70309	35.6828	20.984	61.6358	426.337	334.564	568.021	4.70471	2.8212	7.64663	1.09142	0.787763	1.54828	37.0884	21.5615	65.3873	473.824	366.965	622.423	5.22873	3.17193	8.17718	1.21299	0.869362	1.70309	35.6828	20.984	61.6358
Ghana	2025	833.678	687.494	1094.74	9.19979	5.7082	14.0609	2.13422	1.50826	3.01074	81.1377	50.4195	129.601	647.208	530.251	849.944	7.14206	4.46011	10.8417	1.65685	1.1661	2.35094	67.0734	42.1504	106.395	599.405	484.833	784.939	6.61455	4.10683	10.3091	1.53448	1.08399	2.20241	68.5137	42.7451	109.821	600.207	494.966	788.15	6.62339	4.10963	10.1232	1.53653	1.08589	2.16753	58.4127	36.2982	93.3037
Ghana	2026	1011.31	815.813	1295.35	11.16	7.34245	16.8993	2.58895	1.77135	3.73153	120.352	80.2656	184.817	822.865	659.52	1047.95	9.08047	6.08117	13.7254	2.10653	1.42556	3.06472	106.142	70.4142	163.778	774.521	632.449	983.301	8.54698	5.72394	12.9708	1.98277	1.34253	2.91447	107.598	70.9813	167.24	728.074	587.339	932.555	8.03443	5.28606	12.1663	1.86387	1.27529	2.68635	86.6406	57.7837	133.049
Ghana	2027	1189.92	991.837	1523.91	13.131	8.89847	19.5803	3.04619	2.15666	4.24689	167.275	106.748	255.157	999.72	827.229	1274.24	11.0321	7.58085	16.4267	2.55928	1.80764	3.57395	152.92	96.7952	236.697	951.078	776.718	1208.11	10.4953	7.05542	15.6176	2.43476	1.72411	3.42291	154.391	97.3689	238.499	856.636	714.041	1097.07	9.45313	6.40609	14.0961	2.19299	1.55265	3.05727	120.416	76.8462	183.682
Ghana	2028	1369.95	1161.57	1730.24	15.1176	10.1662	22.427	3.50707	2.51851	4.92976	221.953	149.58	350.154	1178.09	995.51	1478.37	13.0005	8.88225	19.5377	3.01592	2.16645	4.2508	207.461	139.536	328.696	1129.16	945.727	1411.83	12.4605	8.52046	19.0149	2.89066	2.08244	4.09887	208.954	140.12	332.237	986.216	836.213	1245.57	10.8831	7.31857	16.1448	2.52471	1.81312	3.54871	159.771	107.677	252.052
Ghana	2029	1551.4	1324.94	1933.64	17.12	11.7346	25.5323	3.97159	2.85069	5.45511	284.446	196.344	447.307	1357.96	1154.74	1679.7	14.9853	10.44	22.6182	3.47637	2.49568	4.77049	269.825	185.629	425.649	1308.72	1109.38	1612.74	14.442	10.0759	22.0929	3.35033	2.41117	4.6177	271.342	186.902	429.24	1116.81	953.795	1391.95	12.3242	8.44732	18.3797	2.85903	2.05221	3.92677	204.747	141.333	321.972
Ghana	2030	1734.32	1503.23	2133.93	19.1386	13.0002	28.654	4.43986	3.24467	6.08452	354.817	243.806	532.992	1539.45	1320.19	1878.11	16.9881	11.696	25.3716	3.94099	2.88706	5.39488	340.096	232.371	510.037	1489.75	1269	1816.22	16.4397	11.3285	24.5964	3.81377	2.80174	5.24061	341.616	234.157	512.954	1248.45	1082.13	1536.09	13.7769	9.35813	20.6266	3.19604	2.33579	4.37968	255.391	175.487	383.637
Guinea	2021	177.906	108.794	293.136	0.958887	0.50689	1.72685	0.455438	0.236186	0.779056	0.958887	0.50689	1.72685	128.092	78.332	211.058	0.690399	0.364961	1.24333	0.327915	0.170054	0.560921	0.690399	0.364961	1.24333	78.2784	47.8695	128.98	0.42191	0.223032	0.759813	0.200393	0.103922	0.342785	0.42191	0.223032	0.759813	128.092	78.332	211.058	0.690399	0.364961	1.24333	0.327915	0.170054	0.560921	0.690399	0.364961	1.24333
Guinea	2022	358.033	237.826	534.371	1.92975	1.19882	3.47881	0.916565	0.595219	1.40254	5.74109	3.36102	10.4413	257.784	171.235	384.747	1.38942	0.863147	2.50474	0.659927	0.428558	1.00983	4.13359	2.41993	7.51774	182.441	122.514	270.04	0.983335	0.606119	1.77597	0.46705	0.299449	0.711473	3.19446	1.8356	5.81545	257.784	171.235	384.747	1.38942	0.863147	2.50474	0.659927	0.428558	1.00983	4.13359	2.41993	7.51774
Guinea	2023	541.201	396.962	790.089	2.917	1.92205	5.00439	1.38548	0.887964	2.16759	14.4002	8.7684	25.1249	389.649	285.806	568.83	2.10016	1.38383	3.60301	0.997502	0.639319	1.56057	10.3674	6.31273	18.0882	313.129	229.91	460.255	1.68772	1.09392	2.86287	0.80161	0.514285	1.2627	9.41583	5.6384	16.5902	389.649	285.806	568.83	2.10016	1.38383	3.60301	0.997502	0.639319	1.56057	10.3674	6.31273	18.0882
Guinea	2024	727.356	558.135	1090.87	3.92035	2.68276	6.79621	1.86203	1.30351	2.99278	26.9999	16.5179	46.2863	523.65	401.83	785.323	2.8224	1.93143	4.89274	1.34054	0.938471	2.15451	19.437	11.8909	33.3199	470.751	351.679	715.395	2.53729	1.70595	4.38033	1.20512	0.841965	1.96267	20.2059	12.1728	34.9355	523.65	401.83	785.323	2.8224	1.93143	4.89274	1.34054	0.938471	2.15451	19.437	11.8909	33.3199
Guinea	2025	924.889	722.066	1252.72	4.98503	3.40942	8.58995	2.36772	1.61868	3.60657	44.372	29.1844	81.21	718.005	552.306	984.828	3.86995	2.63241	6.75846	1.83809	1.23812	2.82326	36.6978	23.319	68.1786	664.15	502.735	923.207	3.57968	2.46042	6.33559	1.70022	1.127	2.59071	37.4718	23.7992	70.1104	665.824	519.837	901.784	3.5887	2.4545	6.1836	1.70451	1.16533	2.59618	31.9404	21.0076	58.4545
Guinea	2026	1125.75	895.898	1549.42	6.06765	4.15638	10.5365	2.88193	2.00836	4.29877	66.0006	43.4779	120.249	915.39	723.291	1269.54	4.93383	3.35177	8.67409	2.3434	1.62142	3.50227	58.1974	37.63	106.997	860.629	664.274	1211.89	4.63867	3.1759	8.24403	2.20321	1.50843	3.26578	58.9854	38.4498	108.963	810.38	644.953	1115.33	4.36784	2.9921	7.58434	2.07457	1.44581	3.09426	47.5056	31.2944	86.5461
Guinea	2027	1329.09	1089.04	1788.53	7.16359	4.92081	12.274	3.40246	2.4605	4.88451	91.9546	59.9493	161.307	1115.44	904.007	1512.96	6.01209	4.11836	10.3828	2.85553	2.06851	4.07575	84.0233	55.0971	147.839	1059.98	843.678	1449.56	5.71315	3.87298	9.9477	2.71355	1.96353	3.8494	84.8251	55.3903	149.839	956.696	783.922	1287.33	5.15646	3.54223	8.8344	2.44914	1.77121	3.51565	66.1814	43.147	116.085
Guinea	2028	1535.24	1242.36	2015.3	8.27472	5.81147	13.5488	3.9302	2.80441	5.61167	122.287	84.9934	196.104	1318.4	1054.6	1739.81	7.10599	4.99699	11.6288	3.3751	2.40654	4.81748	114.231	80.065	182.563	1262.25	993.507	1669.28	6.80338	4.76847	11.1884	3.23137	2.30026	4.57966	115.049	80.3652	184.236	1105.02	894.248	1450.45	5.95592	4.18314	9.75147	2.82886	2.01869	4.03859	88.0053	61.1666	141.128
Guinea	2029	1744.12	1460.48	2266.62	9.40058	6.68289	15.3858	4.46495	3.26395	6.25172	157.057	108.477	253.934	1524.19	1270.09	1976.51	8.21516	5.83826	13.4384	3.90191	2.86038	5.43307	148.88	103.476	240.189	1467.37	1208.21	1895.72	7.90895	5.51641	12.993	3.75647	2.75284	5.23597	149.716	103.784	241.896	1255.3	1051.18	1631.23	6.76589	4.80999	11.0728	3.21357	2.34935	4.49905	113.018	78.062	182.731
Guinea	2030	1955.67	1693.09	2577.94	10.5408	7.41119	17.4377	5.00651	3.82478	7.04544	196.322	133.322	322.777	1732.83	1495.48	2307.72	9.33974	6.55546	15.4646	4.43605	3.37072	6.22935	188.037	128.254	308.705	1675.26	1449.19	2235.39	9.02944	6.22938	15.0133	4.28867	3.25292	5.98543	188.882	128.565	310.806	1407.47	1218.61	1855.19	7.5861	5.33391	12.5485	3.60313	2.75286	5.06965	141.262	95.9338	232.219
Guinea-Bissau	2021	7.07357	2.01975	19.3634	0.049515	0.0154414	0.153615	0.045073	0.0119351	0.133967	0.049515	0.0154414	0.153615	5.09297	1.45422	13.9417	0.0356508	0.0111178	0.110603	0.0324525	0.00859325	0.0964561	0.0356508	0.0111178	0.110603	3.11237	0.888688	8.51991	0.0217866	0.0067942	0.0675908	0.0198321	0.00525143	0.0589454	0.0217866	0.0067942	0.0675908	5.09297	1.45422	13.9417	0.0356508	0.0111178	0.110603	0.0324525	0.00859325	0.0964561	0.0356508	0.0111178	0.110603
Guinea-Bissau	2022	14.2245	6.41014	34.8819	0.0995712	0.0414978	0.288814	0.0906386	0.035512	0.226396	0.27	0.11832	0.791642	10.2416	4.6153	25.1149	0.0716913	0.0298784	0.207946	0.0652598	0.0255686	0.163005	0.1944	0.0851905	0.569982	7.24906	3.33605	17.8198	0.0507434	0.0215968	0.147543	0.0461912	0.0184816	0.116323	0.149609	0.062144	0.439279	10.2416	4.6153	25.1149	0.0716913	0.0298784	0.207946	0.0652598	0.0255686	0.163005	0.1944	0.0851905	0.569982
Guinea-Bissau	2023	21.4414	11.5403	49.7264	0.15009	0.0797342	0.381338	0.136625	0.0712435	0.317041	0.663288	0.257023	1.91386	15.4374	8.30889	35.8009	0.108061	0.0574078	0.274551	0.0983672	0.0512946	0.228253	0.477543	0.18505	1.37788	12.4151	6.22542	29.1264	0.0869055	0.0422906	0.230125	0.0791091	0.0377871	0.184311	0.432301	0.160011	1.25966	15.4374	8.30889	35.8009	0.108061	0.0574078	0.274551	0.0983672	0.0512946	0.228253	0.477543	0.18505	1.37788
Guinea-Bissau	2024	28.7252	18.3493	61.4924	0.201076	0.115564	0.488575	0.183037	0.101655	0.414092	1.23094	0.614501	3.20525	20.6808	13.2112	44.2698	0.144766	0.0832026	0.351731	0.131779	0.0731897	0.298106	0.886184	0.442404	2.30731	18.6202	11.351	40.6927	0.130342	0.0743885	0.319593	0.118648	0.0681678	0.279243	0.919078	0.435326	2.44123	20.6808	13.2112	44.2698	0.144766	0.0832026	0.351731	0.131779	0.0731897	0.298106	0.886184	0.442404	2.30731
Guinea-Bissau	2025	35.7843	25.1062	76.1184	0.25049	0.154487	0.56542	0.228018	0.139087	0.496462	1.94424	1.25999	4.86447	27.6607	19.5015	59.8734	0.193625	0.121807	0.439997	0.176254	0.110345	0.380891	1.59602	1.00014	3.97818	25.5818	17.711	56.3784	0.179072	0.112914	0.419015	0.163008	0.105279	0.363033	1.62932	1.00717	4.11345	25.7622	18.0754	54.7941	0.180335	0.111222	0.407028	0.164157	0.100137	0.357372	1.39963	0.907078	3.50166
Guinea-Bissau	2026	42.9143	31.313	94.6419	0.3004	0.211647	0.676461	0.273451	0.20619	0.598884	2.82775	1.74914	7.02913	34.7119	25.1418	78.2386	0.242983	0.171804	0.5547	0.221185	0.168366	0.495086	2.47622	1.56611	6.13443	32.6115	24.4194	72.5324	0.228281	0.152755	0.539313	0.207801	0.158656	0.458977	2.50982	1.56195	6.27095	30.8941	22.5431	68.1229	0.216259	0.15237	0.486953	0.196858	0.148441	0.431075	2.03555	1.25914	5.05939
Guinea-Bissau	2027	50.1049	40.4167	101.79	0.350734	0.250372	0.784825	0.31927	0.262065	0.671337	3.88313	2.51018	9.07984	41.8244	33.554	85.3001	0.292771	0.202828	0.671506	0.266506	0.223599	0.562583	3.52821	2.1939	8.49977	39.7049	31.0043	81.9922	0.277934	0.194312	0.62599	0.253001	0.206608	0.540767	3.56211	2.24025	8.54417	36.0693	29.0956	73.2623	0.252485	0.18024	0.564921	0.229834	0.188665	0.48319	2.79511	1.8069	6.53481
Guinea-Bissau	2028	57.3644	47.8746	119.127	0.401551	0.316471	0.857102	0.365527	0.302143	0.755551	5.11183	3.7785	11.4604	49.0045	40.9465	104.005	0.343032	0.270673	0.736488	0.312258	0.260699	0.659638	4.75349	3.44356	10.8512	46.8652	38.3731	99.1849	0.328057	0.253662	0.718207	0.298626	0.250892	0.629068	4.78775	3.462	10.934	41.2936	34.4629	85.736	0.289055	0.227814	0.616914	0.263124	0.217505	0.54377	3.67934	2.71946	8.24647
Guinea-Bissau	2029	64.6946	51.8319	129.604	0.452862	0.34263	0.956608	0.412235	0.3454	0.854781	6.51551	4.61322	13.8098	56.2539	44.8376	112.794	0.393777	0.296395	0.829171	0.358451	0.298791	0.743915	6.1537	4.38135	13.2166	54.0939	42.239	109.423	0.378657	0.279217	0.782651	0.344688	0.281474	0.721685	6.18833	4.36251	13.2042	46.5684	37.3108	93.2679	0.325979	0.24664	0.688519	0.296735	0.248634	0.615133	4.68942	3.32032	9.9384
Guinea-Bissau	2030	72.0964	63.3064	144.869	0.504675	0.420475	1.0798	0.4594	0.407962	0.955461	8.09581	6.29603	18.7073	63.5747	55.7318	127.899	0.445023	0.369627	0.965446	0.4051	0.360629	0.84354	7.73063	6.01473	18.0644	61.3919	54.795	124.492	0.429743	0.348503	0.935301	0.391191	0.33946	0.821066	7.7655	6.03674	18.1509	51.8944	45.5683	104.245	0.363261	0.302651	0.777073	0.330673	0.293664	0.687534	5.82649	4.53079	13.461
Kenya	2021	94.1219	51.0193	163.008	0.845983	0.402764	1.7421	0.333321	0.164454	0.627524	0.845983	0.402764	1.7421	67.7678	36.7339	117.366	0.609108	0.28999	1.25431	0.239991	0.118407	0.451817	0.609108	0.28999	1.25431	41.4136	22.4485	71.7236	0.372233	0.177216	0.766526	0.146661	0.0723598	0.276111	0.372233	0.177216	0.766526	67.7678	36.7339	117.366	0.609108	0.28999	1.25431	0.239991	0.118407	0.451817	0.609108	0.28999	1.25431
Kenya	2022	190.682	118.856	305.972	1.71388	0.997742	3.46786	0.675276	0.35092	1.21912	3.88666	2.12145	7.78426	137.291	85.5763	220.3	1.23399	0.718374	2.49686	0.486199	0.252663	0.877766	2.7984	1.52744	5.60467	97.0771	60.154	155.939	0.872545	0.513407	1.76116	0.343787	0.177241	0.621326	2.13283	1.14541	4.26487	137.291	85.5763	220.3	1.23399	0.718374	2.49686	0.486199	0.252663	0.877766	2.7984	1.52744	5.60467
Kenya	2023	289.112	196.38	426.544	2.59859	1.46137	4.92143	1.02386	0.621523	1.67779	9.17343	4.66865	16.5068	208.159	141.392	307.108	1.87097	1.05218	3.54339	0.73717	0.447493	1.20799	6.60477	3.36138	11.8846	167.078	115.344	245.133	1.50173	0.817807	2.79188	0.591687	0.370457	0.962538	5.9236	2.97056	10.7542	208.159	141.392	307.108	1.87097	1.05218	3.54339	0.73717	0.447493	1.20799	6.60477	3.36138	11.8846
Kenya	2024	389.384	284.346	562.131	3.49985	2.10124	6.30068	1.37895	0.851752	2.17296	16.749	10.281	28.7106	280.351	204.727	404.722	2.51984	1.51286	4.53639	0.992827	0.613254	1.56448	12.0589	7.40212	20.6708	251.667	184.821	363.109	2.26202	1.37035	3.94927	0.891246	0.565076	1.42894	12.3959	7.56513	21.4327	280.351	204.727	404.722	2.51984	1.51286	4.53639	0.992827	0.613254	1.56448	12.0589	7.40212	20.6708
Kenya	2025	494.149	380.558	717.538	4.44149	2.69564	7.52312	1.74997	1.20645	2.72319	26.9461	15.9574	43.0427	382.938	291.639	557.991	3.44191	2.07264	5.72426	1.35613	0.924559	2.11768	22.1531	12.752	35.6273	353.884	256.816	510.698	3.18077	1.91946	5.12878	1.25324	0.814161	1.93819	22.5043	13.0786	36.6035	355.776	273.995	516.603	3.19777	1.9408	5.41645	1.25994	0.868623	1.9606	19.4002	11.4889	30.989
Kenya	2026	601.782	473.841	854.906	5.40892	3.35519	9.16075	2.13114	1.4768	3.24765	39.594	25.0884	64.5561	488.291	383.366	695.752	4.38884	2.74305	7.32461	1.72922	1.20559	2.6434	34.7098	21.7598	56.9982	458.49	347.622	653.929	4.12098	2.59517	6.71414	1.62368	1.10204	2.45851	35.0673	21.8018	57.9918	433.264	341.151	615.496	3.89425	2.41563	6.5954	1.53435	1.06326	2.33815	28.5057	18.0625	46.4769
Kenya	2027	708.904	584.568	986.243	6.37175	3.92943	10.6813	2.51049	1.8517	3.78099	54.7269	34.4004	87.6736	593.816	486.954	825.269	5.33732	3.3077	8.82044	2.10293	1.59672	3.14136	49.7535	31.3469	80.7522	564.038	463.254	775.491	5.06967	3.15934	8.20938	1.99747	1.48441	3.00857	50.1201	31.5244	80.5857	510.381	420.865	710.036	4.58739	2.82903	7.69004	1.80745	1.33316	2.72209	39.4	24.7662	63.1189
Kenya	2028	816.928	680.568	1132.85	7.34269	4.73655	12.2802	2.89305	2.15319	4.29936	72.3454	45.361	115.079	700.522	587.735	966.12	6.29641	4.10808	10.4001	2.48081	1.86333	3.6666	67.2962	41.9267	106.679	670.81	552.027	917.715	6.02935	3.95105	9.78914	2.37559	1.75004	3.50743	67.6808	41.9831	106.891	588.147	489.982	815.569	5.28636	3.41006	8.84106	2.08285	1.55021	3.09523	52.0832	32.6569	82.8464
Kenya	2029	925.785	769.763	1258.2	8.32111	5.53616	14.0301	3.27855	2.46421	4.7751	92.4689	62.6224	151.201	808.291	679.478	1089.73	7.26505	4.87878	12.1333	2.86246	2.1398	4.13572	87.3573	59.34	142.704	778.63	643.333	1041.37	6.99846	4.73238	11.5214	2.75742	2.02484	3.97191	87.7668	59.6677	142.95	666.509	554.193	905.801	5.99069	3.98571	10.1007	2.36036	1.77411	3.43768	66.5693	45.0828	108.849
Kenya	2030	1035.53	857.783	1387.49	9.30753	6.07497	16.0218	3.6672	2.78406	5.26577	115.12	78.01	197.355	917.507	759.357	1218.29	8.24671	5.43782	14.1155	3.24924	2.4465	4.62362	109.999	74.8678	188.837	887.43	722.82	1169.27	7.97637	5.28831	13.4964	3.14272	2.33021	4.47749	110.396	75.0635	189.063	745.51	617.545	998.86	6.70077	4.37353	11.5344	2.64013	2.00437	3.79086	82.8748	56.159	142.072
Liberia	2021	61.2767	36.3498	102.139	1.22817	0.604328	2.30408	0.156868	0.0854884	0.272552	1.22817	0.604328	2.30408	44.1192	26.1719	73.54	0.884281	0.435116	1.65894	0.112945	0.0615516	0.196237	0.884281	0.435116	1.65894	26.9617	15.9939	44.9411	0.540394	0.265904	1.0138	0.0690221	0.0376149	0.119923	0.540394	0.265904	1.0138	44.1192	26.1719	73.54	0.884281	0.435116	1.65894	0.112945	0.0615516	0.196237	0.884281	0.435116	1.65894
Liberia	2022	123.479	81.3228	192.737	2.47488	1.24172	4.2412	0.316105	0.194628	0.510242	5.90257	2.9952	10.408	88.9046	58.5524	138.77	1.78191	0.894035	3.05366	0.227596	0.140132	0.367374	4.24985	2.15654	7.49376	62.9093	40.638	98.0653	1.26089	0.634292	2.15349	0.161048	0.100732	0.257761	3.24944	1.6515	5.76405	88.9046	58.5524	138.77	1.78191	0.894035	3.05366	0.227596	0.140132	0.367374	4.24985	2.15654	7.49376
Liberia	2023	186.744	130.535	263.338	3.7429	2.14483	6.15726	0.478064	0.301102	0.739937	14.0791	8.54278	25.3797	134.45	93.9832	189.593	2.69479	1.54422	4.43299	0.344193	0.216789	0.532722	10.1363	6.15053	18.2724	108.022	76.161	153.53	2.16509	1.28017	3.62901	0.276537	0.171833	0.43551	9.12046	5.45641	16.726	134.45	93.9832	189.593	2.69479	1.54422	4.43299	0.344193	0.216789	0.532722	10.1363	6.15053	18.2724
Liberia	2024	251.068	184.234	339.435	5.03215	2.72697	8.16207	0.642733	0.449706	0.995767	25.8162	14.1268	43.4438	180.753	132.64	244.363	3.62283	1.96329	5.87611	0.462727	0.323768	0.716866	18.585	10.1702	31.2758	162.451	119.669	224.957	3.256	1.77129	5.30727	0.415873	0.286626	0.656798	19.1647	10.3671	32.1772	180.753	132.64	244.363	3.62283	1.96329	5.87611	0.462727	0.323768	0.716866	18.585	10.1702	31.2758
Liberia	2025	322.939	243.651	431.196	6.47267	3.60643	10.5337	0.826724	0.562938	1.26617	42.7647	24.5156	70.5255	251.472	191.204	334.579	5.04025	2.83012	8.30259	0.643768	0.42935	0.98833	35.4175	20.4945	59.526	232.857	178.012	310.187	4.66716	2.63487	7.64214	0.596114	0.406464	0.923097	36.0036	20.6932	59.9869	232.483	175.407	310.4	4.65965	2.59631	7.58293	0.595155	0.405276	0.91144	30.7836	17.6479	50.7641
Liberia	2026	396.178	305.059	510.202	7.94059	4.60224	12.2777	1.01421	0.683236	1.48671	63.7806	38.9032	98.9047	323.454	244.373	419.647	6.48299	3.81233	10.0143	0.828043	0.54732	1.20515	56.3073	33.7317	88.7147	304.484	233.96	401.412	6.10278	3.61338	9.38782	0.779479	0.523997	1.14251	56.9036	34.3775	89.707	285.19	219.611	367.257	5.71607	3.31303	8.83762	0.730088	0.491861	1.07014	45.9079	28.0029	71.1887
Liberia	2027	470.093	381.693	608.296	9.42208	5.64968	14.4658	1.20344	0.88054	1.78588	88.9288	55.855	141.792	396.252	320.217	511.11	7.94209	4.84756	12.1462	1.01441	0.737003	1.52119	81.3297	49.7963	131.56	377.088	305.84	493.344	7.55798	4.64649	11.6098	0.965346	0.690136	1.45495	81.9374	50.5587	132.948	338.379	274.754	437.824	6.78214	4.06681	10.4128	0.866251	0.633858	1.28536	64.0039	40.2004	102.052
Liberia	2028	544.991	451.846	716.219	10.9233	6.70094	16.8047	1.39518	0.990976	2.04031	118.252	77.569	185.602	470.085	381.115	621.518	9.42191	5.88688	14.4669	1.20342	0.835849	1.75013	110.533	71.833	173.628	450.734	359.529	597.323	9.03406	5.6838	13.7797	1.15388	0.788508	1.68622	111.157	72.6236	174.969	392.268	325.251	515.473	7.86223	4.82325	12.0949	1.00421	0.713331	1.46837	85.1013	55.8262	133.57
Liberia	2029	620.845	520.727	793.769	12.4436	8.07379	18.94	1.58936	1.14204	2.36364	151.802	104.469	234.574	544.919	449.056	696.685	10.9218	7.24917	16.5706	1.39499	0.984857	2.07933	143.97	99.2774	222.419	525.381	427.237	673.503	10.5302	7.04401	15.9349	1.34497	0.937005	2.01185	144.613	99.1231	223.797	446.838	374.813	571.232	8.95598	5.81094	13.631	1.14391	0.822028	1.7009	109.237	75.1783	168.801
Liberia	2030	697.668	576.018	896.764	13.9834	9.15202	21.2421	1.78603	1.26331	2.65744	189.638	130.006	287.695	620.845	503.485	799.626	12.4436	8.31747	18.7848	1.58936	1.10423	2.35987	181.718	123.588	276.792	601.027	481.367	774.843	12.0464	8.10944	18.2742	1.53863	1.05572	2.29442	182.363	124.403	277.471	502.099	414.594	645.322	10.0636	6.58659	15.2879	1.28537	0.909275	1.91216	136.452	93.5444	206.982
Madagascar	2021	144.78	103.386	193.76	0.112483	0.0698736	0.177118	0.370636	0.250322	0.545539	0.112483	0.0698736	0.177118	104.241	74.4376	139.507	0.0809875	0.050309	0.127525	0.266858	0.180232	0.392788	0.0809875	0.050309	0.127525	63.7031	45.4896	85.2544	0.0494924	0.0307444	0.0779319	0.16308	0.110142	0.240037	0.0494924	0.0307444	0.0779319	104.241	74.4376	139.507	0.0809875	0.050309	0.127525	0.266858	0.180232	0.392788	0.0809875	0.050309	0.127525
Madagascar	2022	291.317	230.124	371.865	0.226331	0.135781	0.35053	0.745772	0.510528	1.01592	1.51308	0.837544	2.38828	209.748	165.689	267.742	0.162958	0.097762	0.252381	0.536956	0.36758	0.731465	1.08942	0.603031	1.71956	148.449	116.593	189.022	0.115333	0.0683313	0.178779	0.380029	0.258962	0.52437	0.861726	0.47539	1.36367	209.748	165.689	267.742	0.162958	0.097762	0.252381	0.536956	0.36758	0.731465	1.08942	0.603031	1.71956
Madagascar	2023	440.437	343.521	558.062	0.342185	0.217787	0.502303	1.12752	0.762098	1.60316	4.21828	2.75752	6.6705	317.109	247.332	401.796	0.24637	0.156804	0.361651	0.8118	0.548704	1.15425	3.03707	1.98536	4.80258	254.835	197.588	321.01	0.197987	0.126899	0.296487	0.652378	0.438347	0.947699	2.80651	1.84656	4.47654	317.109	247.332	401.796	0.24637	0.156804	0.361651	0.8118	0.548704	1.15425	3.03707	1.98536	4.80258
Madagascar	2024	592.063	474.401	750.025	0.459987	0.288374	0.672006	1.51568	1.05245	2.12485	8.25081	5.17083	12.1727	426.27	341.559	539.994	0.331179	0.207623	0.483826	1.09125	0.757746	1.52982	5.9402	3.7228	8.76368	383.194	308.531	483.482	0.297712	0.186618	0.434651	0.980976	0.684474	1.38931	6.26199	3.92386	9.26301	426.27	341.559	539.994	0.331179	0.207623	0.483826	1.09125	0.757746	1.52982	5.9402	3.7228	8.76368
Madagascar	2025	757.799	630.443	944.06	0.588752	0.382124	0.859871	1.93997	1.3758	2.64356	14.0563	9.25069	20.8379	589.387	486.104	732.302	0.457908	0.300091	0.669885	1.50883	1.06081	2.03908	11.7115	7.64136	17.3788	545.509	450.715	680.092	0.423819	0.278698	0.622768	1.3965	0.985027	1.89593	12.036	7.83752	17.8544	545.583	453.896	679.675	0.423876	0.275115	0.619065	1.39669	0.99053	1.90322	10.1195	6.65975	15.0016
Madagascar	2026	926.101	777.273	1125.35	0.719509	0.474236	1.04184	2.37082	1.66289	3.14333	21.3414	13.4627	30.8612	754.875	629.96	917.641	0.58648	0.384859	0.847509	1.93248	1.34264	2.57232	18.9563	11.8257	27.7045	710.331	593.865	864.952	0.551872	0.359333	0.792943	1.81845	1.26571	2.43386	19.2869	12.0256	28.1965	666.737	559.593	810.173	0.518003	0.341425	0.750064	1.70685	1.19721	2.26297	15.3638	9.6917	22.2167
Madagascar	2027	1097.04	932.236	1309	0.852318	0.572157	1.21588	2.80843	1.99749	3.76319	30.1313	20.2289	42.7661	923.045	776.754	1103.91	0.717135	0.486835	1.0184	2.363	1.67204	3.13864	27.7067	18.5172	39.5978	877.825	732.081	1055.36	0.682002	0.460921	0.963005	2.24723	1.59395	2.99112	28.0432	18.7185	40.0984	789.786	671.14	942.369	0.613603	0.411913	0.875339	2.02185	1.43807	2.70914	21.6909	14.5624	30.7869
Madagascar	2028	1270.51	1083.81	1504.63	0.987086	0.674889	1.40167	3.2525	2.33529	4.36046	40.4488	27.5405	59.0801	1093.79	930.221	1302.61	0.84979	0.579147	1.21726	2.8001	2.00475	3.72613	37.9854	25.8499	55.8609	1047.92	890.635	1253.37	0.81415	0.552856	1.16546	2.68266	1.92554	3.57647	38.3276	26.0568	56.3699	914.644	780.237	1083.18	0.710608	0.485862	1.00908	2.34149	1.68124	3.13902	29.1173	19.8247	42.5297
Madagascar	2029	1446.39	1236.36	1701.85	1.12373	0.766227	1.58674	3.70275	2.67559	4.9119	52.3161	35.0501	74.5754	1267.01	1083.48	1496.8	0.984372	0.668803	1.39274	3.24355	2.34007	4.26801	49.8143	33.0412	71.2008	1220.53	1038.93	1446.91	0.948256	0.642159	1.33855	3.12455	2.25981	4.11636	50.1622	33.2837	71.5868	1041.23	890.072	1225.13	0.808959	0.551586	1.1423	2.66556	1.92619	3.5359	37.6587	25.23	53.683
Madagascar	2030	1624.56	1402.12	1901.46	1.26216	0.861078	1.7786	4.15887	3.0366	5.58983	65.7541	44.1669	93.8435	1442.62	1246.17	1693.47	1.12081	0.762264	1.58875	3.69311	2.69628	4.93671	63.2148	42.1701	90.5249	1395.57	1207.33	1642.98	1.08425	0.735294	1.53564	3.57266	2.61506	4.78322	63.5686	42.4168	91.0512	1169.47	1009.37	1368.79	0.908587	0.61985	1.28037	2.99384	2.18604	4.02377	47.3302	31.7912	67.5503
Malawi	2021	153.649	85.7406	277.079	1.55093	0.769796	3.1102	0.393342	0.211897	0.761904	1.55093	0.769796	3.1102	110.627	61.7333	199.497	1.11667	0.554253	2.23935	0.283206	0.152566	0.548571	1.11667	0.554253	2.23935	67.6056	37.7259	121.915	0.682411	0.33871	1.36849	0.17307	0.0932348	0.335238	0.682411	0.33871	1.36849	110.627	61.7333	199.497	1.11667	0.554253	2.23935	0.283206	0.152566	0.548571	1.11667	0.554253	2.23935
Malawi	2022	311.226	195.505	483.984	3.14152	1.76367	5.51373	0.796739	0.480922	1.37844	6.98206	3.63814	12.7765	224.083	140.764	348.468	2.26189	1.26984	3.96988	0.573652	0.346264	0.99248	5.02708	2.61946	9.19907	158.45	97.7678	247.47	1.5994	0.881974	2.81359	0.405633	0.240499	0.709695	3.82726	1.96929	7.1114	224.083	140.764	348.468	2.26189	1.26984	3.96988	0.573652	0.346264	0.99248	5.02708	2.61946	9.19907
Malawi	2023	472.748	321.058	707.093	4.77192	2.87126	8.57599	1.21024	0.756617	2.12863	16.3927	9.54178	30.6556	340.37	231.158	509.087	3.4357	2.06727	6.17447	0.871348	0.544754	1.53255	11.8023	6.86984	22.0708	273.075	183.6	407.299	2.75642	1.64196	4.94924	0.699072	0.432679	1.24265	10.5723	5.98908	20.1274	340.37	231.158	509.087	3.4357	2.06727	6.17447	0.871348	0.544754	1.53255	11.8023	6.86984	22.0708
Malawi	2024	638.166	471.126	953.056	6.44165	4.33372	11.313	1.63371	1.07962	2.58815	29.8803	18.7926	55.8644	459.454	339.195	686.147	4.63773	3.12012	8.14473	1.1762	0.777292	1.86333	21.5119	13.5295	40.2178	412.014	294.146	639.303	4.15887	2.73511	7.49556	1.05476	0.678353	1.68922	22.0825	13.4118	41.9941	459.454	339.195	686.147	4.63773	3.12012	8.14473	1.1762	0.777292	1.86333	21.5119	13.5295	40.2178
Malawi	2025	828.055	612.77	1230.43	8.35839	5.46667	14.2402	2.11982	1.46127	3.32934	49.8366	29.6361	86.8337	645.016	469.276	971.068	6.51079	4.21543	10.9948	1.65124	1.13772	2.6186	41.26	24.008	71.8314	596.555	433.658	896.172	6.02163	3.80052	10.3319	1.52718	1.04584	2.4341	41.8473	24.0651	72.984	596.145	441.167	885.789	6.01749	3.93564	10.2517	1.52613	1.05204	2.39677	35.8772	21.3343	62.5084
Malawi	2026	1023.55	806.162	1469.54	10.3318	7.03486	16.6261	2.6203	1.79658	4.1484	74.6474	46.3218	124.456	835.853	656.73	1203.54	8.4371	5.7516	13.5059	2.13978	1.44831	3.41697	65.8597	40.5542	111.348	786.007	604.908	1126.49	7.93395	5.2107	12.8602	2.01218	1.32746	3.23293	66.4621	40.6119	112.667	736.865	580.374	1057.89	7.43792	5.0644	11.969	1.88638	1.29343	2.98628	53.7357	33.3438	89.5881
Malawi	2027	1220.36	975.128	1642.47	12.3183	8.2898	20.0735	3.12411	2.09033	5.00209	104.409	66.4815	168.553	1028.88	824.091	1402.22	10.3855	6.98185	16.6769	2.63393	1.76656	4.22556	95.4139	59.9493	153.166	978.642	776.053	1331.15	9.87841	6.55115	15.999	2.50532	1.68373	3.97039	96.0357	60.0237	154.035	878.512	702.014	1182.33	8.8677	5.96763	14.4499	2.24899	1.50487	3.6006	75.1559	47.8566	121.318
Malawi	2028	1420.25	1158.17	1939.46	14.336	9.32467	23.5437	3.63583	2.4827	5.68227	139.17	85.8784	235.607	1225.37	1004.42	1693.27	12.3688	7.99225	20.0835	3.13693	2.15312	4.89234	129.987	79.2143	222.934	1174.8	956.374	1625.84	11.8584	7.55739	19.3938	3.00748	2.04098	4.63501	130.641	79.3064	224.345	1022.37	833.762	1396.08	10.3198	6.71241	16.947	2.61726	1.78729	4.09001	100.172	61.8171	169.587
Malawi	2029	1623.01	1365.34	2281.35	16.3827	10.4496	26.7386	4.15491	2.91374	6.51039	179.001	107.869	306.425	1425.07	1188.68	2031.11	14.3846	9.09963	23.4447	3.64817	2.53673	5.70936	169.65	102.009	293.497	1374.17	1130.37	1963.23	13.8709	8.66022	22.7877	3.51788	2.41231	5.44942	170.345	101.908	294.979	1168.29	982.869	1642.1	11.7927	7.52193	19.2453	2.99081	2.09752	4.68579	128.835	77.6382	220.548
Malawi	2030	1828.77	1513.49	2532.41	18.4596	12.3565	29.6415	4.68165	3.33081	7.27682	223.994	140.855	367.423	1628.54	1323.76	2279.32	16.4385	10.8848	26.3092	4.16906	2.94911	6.46589	214.55	134.664	354.375	1576.76	1283.87	2210.26	15.9158	10.3057	25.6399	4.03651	2.82279	6.20195	215.236	134.757	355.848	1316.34	1089.41	1822.74	13.2872	8.89402	21.3337	3.36984	2.39767	5.23713	161.21	101.37	264.438
Mali	2021	329.223	228.621	482.58	0.527405	0.304013	0.930808	0.842811	0.555655	1.43652	0.527405	0.304013	0.930808	237.041	164.607	347.458	0.379731	0.21889	0.670182	0.606824	0.400072	1.03429	0.379731	0.21889	0.670182	144.858	100.593	212.335	0.232058	0.133766	0.409555	0.370837	0.244488	0.632068	0.232058	0.133766	0.409555	237.041	164.607	347.458	0.379731	0.21889	0.670182	0.606824	0.400072	1.03429	0.379731	0.21889	0.670182
Mali	2022	663.698	495.345	910.6	1.06322	0.676576	1.71473	1.69907	1.23782	2.67869	6.47103	3.99892	10.9119	477.863	356.648	655.632	0.76552	0.487134	1.2346	1.22333	0.891234	1.92866	4.65914	2.87922	7.85658	338.119	253.141	467.72	0.541655	0.348406	0.880086	0.865584	0.627937	1.3494	3.67902	2.24947	6.2162	477.863	356.648	655.632	0.76552	0.487134	1.2346	1.22333	0.891234	1.92866	4.65914	2.87922	7.85658
Mali	2023	1004.98	784.869	1396.42	1.60995	1.0597	2.65373	2.57276	1.85959	4.05356	17.922	11.204	30.624	723.558	565.085	1005.37	1.15912	0.762954	1.91058	1.85231	1.33886	2.91837	12.9028	8.06626	22.0471	581.14	455.443	813.914	0.930968	0.604696	1.54937	1.48772	1.05558	2.32802	11.9072	7.38308	20.382	723.558	565.085	1005.37	1.15912	0.762954	1.91058	1.85231	1.33886	2.91837	12.9028	8.06626	22.0471
Mali	2024	1353.31	1082.89	1799.82	2.16795	1.44144	3.40353	3.46447	2.45007	5.45598	34.9909	22.8109	53.9311	974.289	779.619	1295.69	1.56078	1.03774	2.45027	2.49418	1.76392	3.92774	25.1893	16.4216	38.8206	874.993	691.778	1158.14	1.40171	0.926778	2.18094	2.23998	1.55236	3.51077	26.5206	17.0625	40.9911	974.289	779.619	1295.69	1.56078	1.03774	2.45027	2.49418	1.76392	3.92774	25.1893	16.4216	38.8206
Mali	2025	1706.34	1367.58	2285.56	2.73351	1.78381	4.30405	4.36824	3.14951	6.92844	57.6212	36.5078	90.5789	1319.85	1051.98	1771.55	2.11436	1.37215	3.3361	3.37883	2.42244	5.37029	47.6401	29.9801	75.1978	1218.23	964.926	1630.76	1.95157	1.2586	3.07097	3.11867	2.21103	4.94348	48.9868	30.9023	77.3914	1228.38	984.523	1645.23	1.96783	1.28416	3.09822	3.14466	2.26737	4.98735	41.4768	26.2794	65.1922
Mali	2026	2067.84	1709.66	2654.59	3.3126	2.3125	5.1095	5.29366	3.93552	8.04711	86.0585	57.8898	135.851	1672.93	1393.65	2129.36	2.67999	1.8495	4.1589	4.28271	3.22043	6.45495	75.8687	50.2467	121.01	1568.84	1301.64	1985.13	2.51323	1.73299	3.89758	4.01623	2.99879	6.01771	77.2423	51.2981	122.594	1488.53	1230.73	1910.75	2.38458	1.6647	3.67791	3.81064	2.83307	5.79224	61.9413	41.6655	97.7739
Mali	2027	2435.17	2055.4	3114.49	3.90106	2.64811	5.89031	6.23403	4.56319	9.44125	120.435	76.9058	180.909	2032.11	1730.21	2578.5	3.25537	2.17203	4.90715	5.2022	3.83346	7.81646	110.026	69.0981	167.353	1926.13	1633.1	2447.73	3.08559	2.05337	4.64102	4.93089	3.60783	7.37145	111.426	70.1697	169.416	1752.85	1479.54	2241.58	2.80801	1.90612	4.23969	4.4873	3.28479	6.79514	86.6766	55.3476	130.202
Mali	2028	2809.84	2365.66	3556.27	4.50126	3.06414	6.88653	7.19318	5.30941	10.5803	160.846	104.879	255.043	2398.52	2036.54	3070.63	3.84235	2.57838	5.85183	6.14021	4.5648	8.92208	150.216	96.9064	241.197	2290.63	1941.12	2958.24	3.66951	2.45761	5.55767	5.864	4.33502	8.46894	151.65	98.0041	243.308	2022.42	1702.78	2559.59	3.23985	2.20543	4.95634	5.1774	3.82175	7.61444	115.751	75.4721	183.536
Mali	2029	3191.74	2726.5	3943.78	5.11307	3.4212	7.73364	8.17087	6.21108	11.9349	207.412	131.539	316.077	2772.16	2390.76	3448.29	4.4409	2.92561	6.67837	7.09672	5.4515	10.2433	196.559	123.398	301.941	2662.34	2283.4	3333.94	4.26498	2.80271	6.37883	6.81558	5.21753	9.78207	198.033	124.526	304.109	2297.17	1962.39	2838.35	3.67999	2.4623	5.56566	5.88076	4.47051	8.58862	149.249	94.6495	227.44
Mali	2030	3580.67	3032.96	4457.18	5.73612	3.87354	8.51711	9.16652	7.02398	13.277	260.247	170.08	382.326	3153.2	2690.89	3952.41	5.05133	3.36866	7.44187	8.0722	6.25012	11.5537	249.196	161.791	368.379	3041.17	2591.79	3835.71	4.87185	3.24325	7.13635	7.78539	6.0115	11.0832	250.69	162.934	370.131	2576.94	2182.87	3207.62	4.12817	2.78766	6.12914	6.59697	5.05535	9.55374	187.252	122.37	275.088
Mauritania	2021	4.6804	1.96102	8.60474	0.0165967	0.00638437	0.0336817	0.0279129	0.011614	0.0549317	0.0165967	0.00638437	0.0336817	3.36989	1.41194	6.19541	0.0119496	0.00459675	0.0242508	0.0200973	0.00836206	0.0395508	0.0119496	0.00459675	0.0242508	2.05938	0.86285	3.78609	0.00730255	0.00280912	0.01482	0.0122817	0.00511015	0.0241699	0.00730255	0.00280912	0.01482	3.36989	1.41194	6.19541	0.0119496	0.00459675	0.0242508	0.0200973	0.00836206	0.0395508	0.0119496	0.00459675	0.0242508
Mauritania	2022	9.45374	4.53045	16.6724	0.033523	0.0139924	0.0681999	0.0563799	0.0248588	0.108742	0.113622	0.043911	0.231565	6.80669	3.26192	12.0041	0.0241365	0.0100745	0.049104	0.0405936	0.0178983	0.0782946	0.081808	0.031616	0.166727	4.8149	2.27437	8.46767	0.0170736	0.00702444	0.0347476	0.028715	0.0124796	0.0552287	0.0635334	0.0243777	0.129507	6.80669	3.26192	12.0041	0.0241365	0.0100745	0.049104	0.0405936	0.0178983	0.0782946	0.081808	0.031616	0.166727
Mauritania	2023	14.3042	7.85223	23.2108	0.0507226	0.0250374	0.0932184	0.0853069	0.0444815	0.141061	0.292617	0.132699	0.545974	10.2989	5.65358	16.7116	0.03652	0.0180269	0.0671166	0.0614205	0.0320265	0.101563	0.210681	0.0955422	0.393096	8.27247	4.6612	13.3642	0.0293342	0.0149242	0.0525104	0.0493351	0.0259356	0.0814126	0.192063	0.0857151	0.363139	10.2989	5.65358	16.7116	0.03652	0.0180269	0.0671166	0.0614205	0.0320265	0.101563	0.210681	0.0955422	0.393096
Mauritania	2024	19.2317	11.5497	31.3361	0.0681956	0.0356714	0.126225	0.114693	0.0633738	0.191007	0.554896	0.299819	1.01766	13.8466	8.31571	22.5615	0.0491	0.0256832	0.0908794	0.0825779	0.0456287	0.137521	0.399514	0.215864	0.732697	12.4429	7.75695	20.242	0.0441225	0.0239575	0.0804388	0.0742065	0.0425628	0.121722	0.416567	0.21869	0.784182	13.8466	8.31571	22.5615	0.0491	0.0256832	0.0908794	0.0825779	0.0456287	0.137521	0.399514	0.215864	0.732697
Mauritania	2025	25.0746	16.5665	39.8231	0.0889146	0.0510596	0.162269	0.149539	0.0913876	0.245549	0.962227	0.484555	1.69116	19.5989	12.8817	30.9008	0.0694976	0.0389023	0.126329	0.116883	0.0710607	0.191165	0.804083	0.392331	1.4105	18.176	12.0865	28.5496	0.0644521	0.0350393	0.115744	0.108398	0.0666739	0.175146	0.821547	0.397118	1.44081	18.0532	11.9277	28.6715	0.0640167	0.0367622	0.116828	0.107665	0.0657979	0.176787	0.692772	0.348867	1.21755
Mauritania	2026	31.0197	21.5336	50.2695	0.109996	0.068526	0.191727	0.184995	0.122041	0.299482	1.47104	0.858966	2.46515	25.4553	17.2894	41.2026	0.0902644	0.0576903	0.155205	0.15181	0.101387	0.248288	1.31036	0.723645	2.19881	24.0085	16.0485	38.812	0.0851343	0.0546019	0.144442	0.143181	0.0969273	0.230851	1.32812	0.730985	2.24503	22.3333	15.5037	36.192	0.079194	0.0493369	0.138036	0.133191	0.0878672	0.215614	1.05909	0.618423	1.77478
Mauritania	2027	37.0426	26.2185	58.0016	0.131353	0.0829903	0.22789	0.220914	0.154376	0.359304	2.0828	1.23065	3.53302	31.3931	21.9101	48.7964	0.11132	0.070745	0.190811	0.187222	0.128774	0.30733	1.91957	1.10182	3.24475	29.9272	20.6526	46.3741	0.106122	0.0671928	0.179904	0.178479	0.124432	0.289657	1.93761	1.11539	3.28465	26.6693	18.8765	41.7583	0.0945694	0.0597501	0.164068	0.15905	0.111147	0.258679	1.4995	0.886008	2.54355
Mauritania	2028	43.1535	29.5978	67.9111	0.153022	0.100073	0.260076	0.257358	0.179073	0.396302	2.79888	1.70039	4.6109	37.4198	24.9768	58.5687	0.13269	0.0852804	0.222451	0.223163	0.153377	0.343565	2.63312	1.58973	4.37154	35.9346	24.2902	56.1146	0.127424	0.0804186	0.2114	0.214306	0.149029	0.325656	2.65148	1.59602	4.41928	31.0685	21.3093	48.8917	0.110169	0.0720491	0.187237	0.185286	0.128927	0.285312	2.015	1.22418	3.31948
Mauritania	2029	49.3519	36.4371	72.7087	0.175002	0.11337	0.307522	0.294324	0.205954	0.465351	3.62074	2.36575	6.26876	43.5345	31.7489	63.2297	0.154373	0.102041	0.269344	0.25963	0.177559	0.407578	3.45247	2.26619	5.97013	42.0301	30.7732	60.7439	0.149039	0.0989598	0.258149	0.250658	0.171711	0.390637	3.47121	2.26954	6.00267	35.5307	26.2329	52.3453	0.125992	0.0816204	0.221391	0.211897	0.148278	0.335014	2.60664	1.70319	4.51273
Mauritania	2030	55.6396	43.0166	80.6712	0.197298	0.133189	0.330503	0.331822	0.226926	0.502664	4.55001	3.02643	7.29482	49.7416	38.48	71.1127	0.176384	0.121704	0.291798	0.296648	0.198139	0.448417	4.37946	2.9136	7.0346	48.2151	36.7727	68.5387	0.170971	0.116536	0.280438	0.287544	0.192204	0.430004	4.3984	2.92458	7.07584	40.057	30.9697	58.0769	0.142042	0.0958871	0.237933	0.238891	0.163377	0.361873	3.27559	2.1788	5.25142
Mozambique	2021	430.215	302.633	593.038	2.14537	1.25318	3.57067	1.10135	0.678931	1.70224	2.14537	1.25318	3.57067	309.755	217.896	426.988	1.54467	0.902289	2.57088	0.792972	0.488831	1.22561	1.54467	0.902289	2.57088	189.294	133.159	260.937	0.943964	0.551399	1.5711	0.484594	0.29873	0.748987	0.943964	0.551399	1.5711	309.755	217.896	426.988	1.54467	0.902289	2.57088	0.792972	0.488831	1.22561	1.54467	0.902289	2.57088
Mozambique	2022	868.301	638.163	1122.98	4.33	2.80875	6.7422	2.22285	1.45893	3.18259	16.584	9.83878	27.2689	625.177	459.477	808.542	3.1176	2.0223	4.85438	1.60045	1.05043	2.29147	11.9405	7.08392	19.6336	442.282	326.115	570.297	2.20555	1.43597	3.44588	1.13224	0.744547	1.63164	9.31465	5.45716	15.3872	625.177	459.477	808.542	3.1176	2.0223	4.85438	1.60045	1.05043	2.29147	11.9405	7.08392	19.6336
Mozambique	2023	1315.47	1050.85	1659.3	6.55991	4.07548	9.67933	3.3676	2.26502	4.82134	43.5513	26.2363	64.3673	947.101	756.593	1194.64	4.72295	2.93425	6.96881	2.42458	1.63077	3.47118	31.3546	18.8889	46.3405	760.525	596.502	971.025	3.79255	2.33609	5.48655	1.94694	1.31871	2.81963	28.6808	17.1286	42.6791	947.101	756.593	1194.64	4.72295	2.93425	6.96881	2.42458	1.63077	3.47118	31.3546	18.8889	46.3405
Mozambique	2024	1771.62	1433.46	2246.87	8.83463	5.45386	12.6361	4.53535	3.22573	6.37102	83.3016	50.2815	119.053	1275.46	1032.01	1617.59	6.36038	3.92647	9.09712	3.26517	2.32238	4.58663	59.9682	36.1976	85.7033	1145.27	930.231	1456.8	5.71116	3.49764	8.04183	2.93188	2.10561	4.26927	62.6908	37.698	90.3423	1275.46	1032.01	1617.59	6.36038	3.92647	9.09712	3.26517	2.32238	4.58663	59.9682	36.1976	85.7033
Mozambique	2025	2267.59	1829.86	2848.13	11.3079	7.0893	15.9392	5.80503	4.08975	8.05793	139.782	87.7189	202.004	1761.6	1420.45	2230.78	8.78468	5.53167	12.4944	4.50971	3.16849	6.2384	115.996	73.3618	171.704	1628.74	1316.58	2064.94	8.12213	5.09406	11.4056	4.16958	2.9743	5.91428	118.761	74.885	174.801	1632.43	1317.33	2050.33	8.14054	5.10363	11.4744	4.17903	2.94434	5.8007	100.62	63.144	145.409
Mozambique	2026	2773.8	2282.38	3496.24	13.8322	8.65586	19.8938	7.10092	5.05089	9.65585	210.497	131.583	306.752	2257.43	1864.57	2866.24	11.2573	7.06631	16.4366	5.77903	4.09951	7.80157	186.222	116.931	277.216	2121.87	1758.58	2697.03	10.5812	6.61979	15.2617	5.43198	3.84506	7.46831	189.048	118.488	279.49	1996.74	1643.01	2516.74	9.95725	6.23109	14.3205	5.11166	3.63614	6.95055	151.511	94.7126	220.788
Mozambique	2027	3287.51	2688.22	4114.12	16.394	10.1924	23.6917	8.41603	6.35517	11.5162	295.731	182.565	433.531	2761.39	2262.5	3472.2	13.7704	8.57282	20.1704	7.06916	5.39711	9.65405	270.969	167.619	403.404	2623.76	2154.92	3300.37	13.084	8.11941	18.9774	6.71683	5.17325	9.28847	273.855	169.209	405.728	2366.41	1935.07	2961.34	11.8007	7.33684	17.0534	6.058	4.57485	8.28902	212.844	131.4	312.013
Mozambique	2028	3809.83	3164.79	4750.36	18.9987	12.0097	27.0762	9.75317	7.23986	13.5594	395.699	252.836	562.53	3274.23	2731.38	4096.84	16.3278	10.3612	23.4918	8.38204	6.26441	11.6324	370.464	237.605	531.829	3134.6	2622.23	3922.48	15.6315	9.90112	22.2805	8.02458	6.06064	11.2926	373.419	239.235	534.215	2742.22	2277.98	3419.09	13.6748	8.64448	19.4885	7.0201	5.21151	9.75891	284.77	181.962	404.824
Mozambique	2029	4340.56	3662.45	5380.77	21.6453	13.6128	30.1738	11.1118	8.33749	15.48	510.639	322.262	719.14	3795.76	3221.6	4716.14	18.9285	11.9359	26.5287	9.71715	7.25468	13.5195	484.946	306.755	684.911	3654.15	3110.91	4539.25	18.2223	11.4692	25.2992	9.35461	6.93502	13.1754	487.976	308.428	688.794	3124.05	2636.03	3872.6	15.5789	9.79786	21.7169	7.99757	6.00126	11.1403	367.457	231.911	517.504
Mozambique	2030	4879.61	4120.5	5912.91	24.3334	15.3639	33.6467	12.4918	9.47309	17.0726	640.791	407.299	917.549	4326.18	3672.66	5237.71	21.5736	13.6605	30.1236	11.075	8.37317	15.0811	614.695	391.549	884.31	4182.25	3560.16	5057.94	20.8559	13.1862	29.201	10.7066	8.04833	14.7312	617.766	393.244	887.754	3511.82	2965.55	4255.38	17.5126	11.0576	24.2147	8.99025	6.81831	12.2857	461.078	293.084	660.201
Namibia	2021	0.500068	0.390639	0.63341	0.000592518	0.00036769	0.00090307	0.00128017	0.000901666	0.00181478	0.000592518	0.00036769	0.00090307	0.360049	0.28126	0.456055	0.000426613	0.000264736	0.00065021	0.000921725	0.000649199	0.00130664	0.000426613	0.000264736	0.00065021	0.22003	0.171881	0.278701	0.000260708	0.000161783	0.000397351	0.000563277	0.000396733	0.000798505	0.000260708	0.000161783	0.000397351	0.360049	0.28126	0.456055	0.000426613	0.000264736	0.00065021	0.000921725	0.000649199	0.00130664	0.000426613	0.000264736	0.00065021
Namibia	2022	1.00516	0.80927	1.27032	0.00119099	0.000763448	0.00177398	0.00257322	0.00187749	0.00347022	0.00485891	0.00305851	0.00721006	0.723717	0.582674	0.914629	0.000857514	0.000549682	0.00127726	0.00185272	0.00135179	0.00249856	0.00349841	0.00220213	0.00519124	0.512281	0.413443	0.647844	0.000606989	0.000390806	0.000903491	0.00131144	0.000961443	0.00177662	0.00273439	0.00171103	0.00405644	0.723717	0.582674	0.914629	0.000857514	0.000549682	0.00127726	0.00185272	0.00135179	0.00249856	0.00349841	0.00220213	0.00519124
Namibia	2023	1.51122	1.22893	1.8705	0.00179061	0.0011849	0.00262469	0.00386873	0.00280493	0.00511	0.0128313	0.00792528	0.0185938	1.08808	0.884831	1.34676	0.00128924	0.000853126	0.00188977	0.00278548	0.00201955	0.00367919	0.00923849	0.00570619	0.0133875	0.875668	0.698721	1.08223	0.00103756	0.000674088	0.0015135	0.00224171	0.00159237	0.00296271	0.00846817	0.00518658	0.0122928	1.08808	0.884831	1.34676	0.00128924	0.000853126	0.00188977	0.00278548	0.00201955	0.00367919	0.00923849	0.00570619	0.0133875
Namibia	2024	2.01823	1.68085	2.3801	0.00239135	0.0015447	0.00339337	0.00516667	0.00378626	0.00669321	0.0245166	0.0154098	0.0361519	1.45312	1.21021	1.71367	0.00172177	0.00111218	0.00244322	0.00372	0.0027261	0.0048191	0.0176519	0.011095	0.0260293	1.31032	1.07483	1.54895	0.00155256	0.00099323	0.00221996	0.00335442	0.0024338	0.00437989	0.0185036	0.0115481	0.0273726	1.45312	1.21021	1.71367	0.00172177	0.00111218	0.00244322	0.00372	0.0027261	0.0048191	0.0176519	0.011095	0.0260293
Namibia	2025	2.53561	2.10595	3.02862	0.00300438	0.00201023	0.00426977	0.00649116	0.00465214	0.00843221	0.0402098	0.0273392	0.0594522	1.96829	1.63353	2.3612	0.00233218	0.00156999	0.00332519	0.00503883	0.00358777	0.00657787	0.0333056	0.0226457	0.0492705	1.8258	1.49835	2.19079	0.00216334	0.00145732	0.00312667	0.00467404	0.00329604	0.00609588	0.0341722	0.0233356	0.0506363	1.82563	1.51628	2.1806	0.00216315	0.00144736	0.00307423	0.00467362	0.00334953	0.00607117	0.0289509	0.0196841	0.0428053
Namibia	2026	3.05412	2.57025	3.60844	0.00361874	0.00244002	0.00521751	0.00781854	0.00570217	0.0101147	0.059702	0.0408532	0.0895411	2.48571	2.09495	2.93845	0.00294525	0.00200504	0.0042711	0.00636341	0.00463575	0.00826679	0.0527847	0.0361864	0.0793402	2.34292	1.97197	2.77481	0.00277607	0.00188604	0.00407219	0.00599789	0.00434343	0.00777969	0.0536529	0.0368761	0.0807086	2.19895	1.85057	2.59806	0.00260548	0.0017568	0.00375658	0.00562932	0.00410555	0.00728255	0.0429851	0.0294141	0.0644691
Namibia	2027	3.57319	3.02563	4.18168	0.00423379	0.002838	0.00608742	0.00914738	0.00674129	0.0118799	0.0829985	0.0560482	0.122486	3.00381	2.54953	3.51184	0.00355914	0.00240228	0.00513936	0.00768975	0.00567306	0.0100288	0.0760681	0.051693	0.112266	2.86086	2.42641	3.35309	0.00338976	0.00228313	0.00494021	0.0073238	0.00538041	0.00954108	0.076938	0.0521566	0.113637	2.57268	2.17844	3.01079	0.00304831	0.00204335	0.00438292	0.00658607	0.0048537	0.00855347	0.0597583	0.0403543	0.0881889
Namibia	2028	4.09332	3.56694	4.79447	0.00485007	0.00317841	0.0069821	0.0104789	0.00787586	0.0137325	0.110104	0.0709962	0.161847	3.52294	3.06004	4.1388	0.00417424	0.00274193	0.00603239	0.00901872	0.0068021	0.0118782	0.103161	0.0666333	0.151609	3.37975	2.93662	3.97314	0.00400458	0.00262258	0.00583293	0.00865216	0.00651259	0.0113897	0.104033	0.0670981	0.152983	2.94717	2.56818	3.45199	0.00349203	0.00228844	0.00502707	0.00754476	0.00567059	0.00988731	0.079274	0.0511167	0.116528
Namibia	2029	4.61485	3.98912	5.38522	0.00546801	0.0036244	0.00788169	0.011814	0.00881876	0.0153803	0.141027	0.0933349	0.206881	4.04334	3.5132	4.72593	0.00479085	0.00318706	0.00693015	0.0103509	0.00774648	0.0135223	0.134072	0.0889643	0.196625	3.89976	3.377	4.56798	0.00462073	0.0030674	0.00673015	0.0099834	0.00745252	0.0130326	0.134945	0.08943	0.198001	3.32266	2.87215	3.87732	0.00393693	0.00260955	0.00567476	0.00850601	0.00634946	0.0110737	0.101538	0.0672002	0.148952
Namibia	2030	5.13817	4.43083	6.00332	0.00608809	0.00406415	0.00873192	0.0131537	0.0099241	0.0171234	0.175777	0.117995	0.25452	4.56533	3.95378	5.34249	0.00540934	0.00362577	0.00777821	0.0116872	0.00884929	0.0152611	0.16881	0.113616	0.244246	4.42114	3.81702	5.17712	0.0052385	0.00350561	0.00757731	0.0113181	0.00855407	0.0147692	0.169683	0.114082	0.245623	3.69945	3.19017	4.32234	0.00438338	0.00292616	0.00628691	0.00947058	0.00714529	0.0123287	0.126558	0.0849549	0.183252
Niger	2021	398.384	189.453	773.722	1.62158	0.619203	3.73441	1.01986	0.492102	2.34546	1.62158	0.619203	3.73441	286.836	136.406	557.08	1.16754	0.445826	2.68877	0.734301	0.354313	1.68873	1.16754	0.445826	2.68877	175.289	83.3594	340.438	0.713496	0.272449	1.64314	0.44874	0.216525	1.032	0.713496	0.272449	1.64314	286.836	136.406	557.08	1.16754	0.445826	2.68877	0.734301	0.354313	1.68873	1.16754	0.445826	2.68877
Niger	2022	808.461	438.918	1454.74	3.29076	1.49712	7.39633	2.06966	1.11208	4.22311	9.90308	4.53818	22.3567	582.092	316.021	1047.41	2.36935	1.07792	5.32536	1.49016	0.800698	3.04064	7.13021	3.26749	16.0968	411.497	221.193	738.631	1.67496	0.763109	3.76835	1.05343	0.560434	2.14425	5.51102	2.52722	12.4488	582.092	316.021	1047.41	2.36935	1.07792	5.32536	1.49016	0.800698	3.04064	7.13021	3.26749	16.0968
Niger	2023	1231.1	811.538	2146.89	5.01106	2.48671	10.9778	3.15161	1.8934	5.77564	25.0447	13.3243	53.7802	886.356	584.295	1545.67	3.60782	1.79038	7.90358	2.26907	1.36322	4.15816	18.031	9.59298	38.7175	710.574	474.291	1231.97	2.89232	1.46598	6.2995	1.81907	1.10036	3.3082	16.3644	8.83098	34.9653	886.356	584.295	1545.67	3.60782	1.79038	7.90358	2.26907	1.36322	4.15816	18.031	9.59298	38.7175
Niger	2024	1666.62	1163.32	2854.47	6.78381	3.62356	14.5959	4.26654	2.80967	7.44431	47.2544	26.5216	98.8849	1199.86	837.541	2054.95	4.88393	2.60878	10.5077	3.07165	2.02285	5.35913	34.0183	19.0937	71.1807	1074.44	715.508	1821.64	4.3734	2.42307	9.31469	2.75056	1.76908	4.76169	35.3073	19.6372	73.4123	1199.86	837.541	2054.95	4.88393	2.60878	10.5077	3.07165	2.02285	5.35913	34.0183	19.0937	71.1807
Niger	2025	2123.68	1547.76	3365.75	8.64422	4.68067	17.2102	5.43661	3.96199	9.23781	77.3362	45.0232	139.464	1642.74	1186.79	2558.35	6.68661	3.63508	12.9977	4.20541	3.08136	7.18017	63.7029	37.0094	114.514	1513.41	1110.91	2392.85	6.16018	3.44353	11.7677	3.87433	2.76549	6.79614	65.0264	38.2266	117.732	1528.84	1114.27	2422.89	6.223	3.36971	12.3891	3.91383	2.85234	6.64979	55.6699	32.4113	100.382
Niger	2026	2595.34	1952.21	4097.53	10.5641	5.85535	20.227	6.64407	4.7828	10.9734	115.077	68.4528	207.888	2099.43	1568.55	3288.67	8.54554	4.77727	15.8833	5.37455	3.88388	8.9389	101.023	60.1918	187.527	1965.96	1459.93	3121.68	8.00225	4.57953	14.614	5.03286	3.56502	8.4693	102.387	61.4465	189.374	1868.3	1405.37	2949.47	7.60471	4.21519	14.5598	4.78284	3.44315	7.89849	82.8307	49.2743	149.637
Niger	2027	3079.27	2232.26	4792.38	12.5339	6.69531	22.5703	7.88294	5.64478	12.851	160.708	87.4524	269.533	2568.55	1862.03	3959.22	10.455	5.58487	18.0969	6.57548	4.71343	10.7555	146.221	78.9372	248.235	2431.47	1794.38	3787.78	9.89705	5.38196	16.793	6.22456	4.39655	10.2733	147.628	80.2308	250.662	2216.55	1606.92	3449.43	9.02223	4.8197	16.2457	5.67436	4.0635	9.24925	115.667	62.9477	193.97
Niger	2028	3577.06	2757.64	5581.74	14.56	8.27111	26.3478	9.15726	6.81329	15.0535	214.438	130.769	381.848	3051.31	2376.43	4724.05	12.4201	7.12774	21.7432	7.81136	5.62271	12.8961	199.514	121.995	355.666	2910.55	2307.02	4548.14	11.8471	6.91956	20.4679	7.45101	5.2678	12.4011	200.97	123.331	360.863	2574.73	1984.98	4017.3	10.4802	5.95365	18.9632	6.59131	4.90449	10.8335	154.326	94.1174	274.77
Niger	2029	4088.89	3349.13	6312.69	16.6434	10.0665	28.8804	10.4676	7.87712	17.0647	276.495	172.399	468.778	3547.95	2913.23	5430.01	14.4416	8.88987	24.1429	9.08275	6.65248	14.845	261.131	160.552	448.704	3403.4	2795.39	5249.53	13.8532	8.67636	23.1654	8.7127	6.28791	14.3369	262.641	161.532	451.325	2942.99	2410.63	4543.09	11.9791	7.24549	20.7851	7.53404	5.67003	12.28	198.973	124.054	337.305
Niger	2030	4614.94	3780.76	7173.1	18.7846	11.3398	32.1994	11.8142	8.99892	18.6377	347.114	219.51	620.021	4058.92	3377.59	6265.92	16.5214	10.1306	28.3269	10.3908	7.79233	16.3561	331.326	207.335	592.316	3910.19	3304.29	6080.12	15.916	9.91072	27.6328	10.0101	7.49079	16.089	332.872	208.338	597.824	3321.44	2721.15	5161.93	13.5196	8.16166	23.1724	8.50287	6.47722	13.4112	249.773	157.939	446.06
Nigeria	2021	2517.73	1744.09	3528.61	13.6641	8.05285	23.5706	6.44539	3.69967	9.77913	13.6641	8.05285	23.5706	1812.76	1255.74	2540.6	9.83813	5.79805	16.9708	4.64068	2.66376	7.04097	9.83813	5.79805	16.9708	1107.8	767.398	1552.59	6.01219	3.54325	10.371	2.83597	1.62785	4.30282	6.01219	3.54325	10.371	1812.76	1255.74	2540.6	9.83813	5.79805	16.9708	4.64068	2.66376	7.04097	9.83813	5.79805	16.9708
Nigeria	2022	5077.98	3711.54	6675.1	27.5589	17.6213	47.1249	12.9996	8.43873	18.6298	123.305	73.6871	209.382	3656.14	2672.31	4806.07	19.8424	12.6873	33.9299	9.35973	6.07589	13.4134	88.7797	53.0547	150.755	2586.79	1889.21	3396.39	14.0389	9.0343	23.9779	6.62219	4.36765	9.44932	69.584	41.1626	118.115	3656.14	2672.31	4806.07	19.8424	12.6873	33.9299	9.35973	6.07589	13.4134	88.7797	53.0547	150.755
Nigeria	2023	7680.06	6019.4	9746.66	41.6808	27.9826	68.5302	19.661	13.8812	27.2997	330.572	195.465	522.563	5529.45	4333.85	7017.3	30.0091	20.1467	49.3395	14.1554	9.9942	19.6549	237.996	140.723	376.213	4442.24	3482.21	5669.64	24.1087	15.6569	39.2219	11.3721	8.20789	16.2578	218.489	128.403	343.053	5529.45	4333.85	7017.3	30.0091	20.1467	49.3395	14.1554	9.9942	19.6549	237.996	140.723	376.213
Nigeria	2024	10325.2	7923.87	12754.9	56.0366	37.9677	90.0472	26.4326	19.5896	36.0398	637.036	408.425	980.122	7433.59	5704.83	9182.63	40.3432	27.3344	64.8276	19.03	14.1036	25.946	458.603	294.019	705.561	6680.64	5073.48	8284.33	36.2568	24.1024	57.3944	17.1024	12.6273	23.5633	480.935	309.486	734.756	7433.59	5704.83	9182.63	40.3432	27.3344	64.8276	19.03	14.1036	25.946	458.603	294.019	705.561
Nigeria	2025	13213	10269	16354.6	71.7088	46.4909	113.409	33.8253	25.5583	46.7583	1075.65	644.328	1677.02	10272.8	8012.67	12772.4	55.7522	35.6786	87.7674	26.2985	19.9101	36.5261	894.258	528.009	1411.87	9507.22	7370.72	11758.8	51.597	32.3924	80.2087	24.3385	18.2196	34.1787	916.952	545.146	1446.81	9512.13	7392.88	11773.5	51.6237	33.4691	81.6414	24.3511	18.4	33.6606	774.308	463.815	1207.14
Nigeria	2026	16153.6	13005	20155.6	87.6677	57.3183	137.478	41.3531	31.9984	56.6349	1624.83	999.169	2582.81	13162.7	10709.7	16559.7	71.4359	46.3183	112.951	33.6965	26.0078	46.2269	1440.39	880.379	2315.69	12382.7	10055.8	15527.2	67.2028	42.9701	105.908	31.6998	24.4315	43.8357	1463.45	894.983	2348.71	11628.5	9362.15	14508.9	63.1095	41.2617	98.9623	29.7689	23.0356	40.7681	1169.55	719.205	1858.99
Nigeria	2027	19133	15886.1	23640.1	103.838	67.9224	161.244	48.9805	37.2429	65.3727	2286.46	1450.35	3552.73	16093.2	13482.5	19985.6	87.3398	56.7455	136.318	41.1985	31.0889	55.0868	2098.88	1330.07	3278.53	15302.1	12814.7	18994.7	83.0466	53.3515	129.176	39.1734	29.4785	52.8343	2122.31	1347.77	3314.61	13772.6	11435.2	17016.2	74.7458	48.8928	116.064	35.2578	26.8101	47.055	1645.67	1043.87	2556.89
Nigeria	2028	22159.6	18326	27377.1	120.263	76.7889	186.514	56.7286	42.9121	75.5	3062.07	1862.86	4669.23	19070.6	15883.3	23623.6	103.499	65.4309	159.576	48.8206	36.9548	65.2302	2871.33	1740.55	4432.5	18268.2	15205.9	22773.9	99.1439	61.9868	151.653	46.7665	35.9385	62.501	2895.22	1758.59	4458.98	15950.4	13190.8	19704.9	86.5652	55.2728	134.243	40.8331	30.8899	54.3412	2203.75	1340.69	3360.65
Nigeria	2029	25233.9	21089.7	31574.6	136.948	90.0575	208.841	64.5988	48.8187	87.0408	3953.41	2515.38	5942.68	22095.5	18681.4	27760.9	119.915	78.3736	181.473	56.5645	42.7658	76.1185	3759.55	2390.52	5702.09	21281.3	17998.5	26899	115.497	74.7612	173.432	54.4801	41.7356	73.6223	3783.94	2405.97	5729.14	18162.3	15180.1	22724.5	98.5696	64.8194	150.305	46.4956	35.1402	62.6432	2845.03	1810.21	4276.94
Nigeria	2030	28356.5	24045.3	34708.5	153.895	102.076	235.353	72.5927	54.831	98.0806	4962.34	3233.58	7415.42	25170.2	21525.9	30836.9	136.602	90.2123	207.565	64.4357	48.6863	86.9908	4765.63	3106.89	7112.78	24342.1	20826.7	29959.9	132.108	86.5393	199.388	62.3157	47.6375	84.4518	4790.29	3122.51	7145.01	20408.8	17305.4	24978.8	110.761	73.468	169.374	52.2465	39.4662	70.5838	3570.84	2326.9	5335.32
Rwanda	2021	101.196	70.3308	133.901	0.627491	0.347834	0.955877	0.259063	0.158392	0.36454	0.627491	0.347834	0.955877	72.8614	50.6381	96.4087	0.451793	0.25044	0.688231	0.186525	0.114042	0.262469	0.451793	0.25044	0.688231	44.5264	30.9455	58.9164	0.276096	0.153047	0.420586	0.113988	0.0696925	0.160398	0.276096	0.153047	0.420586	72.8614	50.6381	96.4087	0.451793	0.25044	0.688231	0.186525	0.114042	0.262469	0.451793	0.25044	0.688231
Rwanda	2022	200.331	146.762	251.64	1.2422	0.780264	1.87043	0.512847	0.362061	0.704647	2.93444	1.77269	4.38931	144.238	105.669	181.181	0.894382	0.56179	1.34671	0.36925	0.260684	0.507346	2.1128	1.27634	3.1603	102.313	75.4754	128.481	0.634415	0.398434	0.953745	0.261921	0.184289	0.3609	1.61607	0.968655	2.41492	144.238	105.669	181.181	0.894382	0.56179	1.34671	0.36925	0.260684	0.507346	2.1128	1.27634	3.1603
Rwanda	2023	299.261	231.72	367.226	1.85564	1.16631	2.91226	0.766109	0.55748	1.03609	6.89834	4.35776	11.1132	215.463	166.834	264.394	1.33603	0.839725	2.09677	0.551584	0.401378	0.745963	4.96658	3.13747	8.00118	173.878	135.016	215.708	1.07817	0.678789	1.70696	0.445127	0.322947	0.606425	4.47694	2.8279	7.26639	215.463	166.834	264.394	1.33603	0.839725	2.09677	0.551584	0.401378	0.745963	4.96658	3.13747	8.00118
Rwanda	2024	397.976	314.27	488.162	2.46774	1.59785	3.63207	1.01882	0.734669	1.44032	12.5153	8.14949	18.3555	286.526	226.263	351.453	1.77667	1.15039	2.61496	0.733507	0.528939	1.03695	9.01022	5.86712	13.2149	259.19	203.098	320.255	1.60716	1.05153	2.34934	0.663525	0.474449	0.955504	9.32056	5.97717	13.727	286.526	226.263	351.453	1.77667	1.15039	2.61496	0.733507	0.528939	1.03695	9.01022	5.86712	13.2149
Rwanda	2025	510.885	417.497	628.344	3.16786	2.09047	4.68034	1.30787	0.981593	1.84334	20.8169	14.111	31.1709	400.1	330.006	493.563	2.48091	1.64587	3.67854	1.02426	0.762649	1.44268	17.348	11.5716	26.0844	372.479	307.664	462.002	2.30964	1.54578	3.43386	0.953545	0.693009	1.36007	17.6423	11.7631	26.5724	367.803	300.571	452.354	2.28064	1.50501	3.36956	0.941575	0.706692	1.32705	14.986	10.1583	22.4402
Rwanda	2026	622.561	516.459	750.254	3.86033	2.53019	5.83082	1.59376	1.16678	2.24571	30.9789	20.6088	48.0354	512.118	421.119	616.777	3.17551	2.08693	4.8322	1.31102	0.948566	1.84618	27.5161	18.1903	42.9581	484.718	390.434	589.4	3.00561	1.98766	4.58959	1.24088	0.879449	1.76423	27.8103	18.3817	43.446	448.184	371.805	540.09	2.77907	1.82152	4.19768	1.14735	0.839991	1.61663	22.3004	14.8358	34.5794
Rwanda	2027	736.622	614.411	893.36	4.56759	3.10772	7.03078	1.88575	1.3679	2.67406	43.02	29.2882	68.4853	625.788	521.77	759.542	3.88034	2.66304	6.02834	1.60202	1.1477	2.27351	39.5612	26.8084	63.4132	597.808	500.07	731.575	3.70684	2.54804	5.78024	1.53039	1.09795	2.1898	39.8526	26.939	63.8964	530.276	442.306	643.074	3.2881	2.2372	5.06136	1.35751	0.984758	1.92489	30.9666	21.0826	49.2982
Rwanda	2028	851.662	722.177	1031.33	5.28092	3.62573	8.05488	2.18026	1.57137	3.08703	56.9711	38.1176	88.5374	740.093	632.76	896.611	4.58912	3.12955	7.0461	1.89464	1.34972	2.68379	53.5038	35.5788	83.4542	711.494	609.195	867.925	4.41178	2.99718	6.79252	1.82143	1.29877	2.59793	53.7862	35.7615	83.925	613.067	519.87	742.349	3.80146	2.61005	5.7984	1.56945	1.1312	2.22204	41.0066	27.4354	63.7295
Rwanda	2029	967.743	816.778	1150.65	6.00071	4.08469	9.18611	2.47742	1.81143	3.4442	72.851	47.9171	113.549	855.166	722.745	1014.82	5.30265	3.57135	8.16837	2.18923	1.58778	3.03763	69.3628	45.3626	108.436	825.998	703.47	985.469	5.12179	3.4364	7.90962	2.11456	1.53575	2.94977	69.6328	45.5361	108.889	696.599	587.943	828.2	4.31942	2.94019	6.61247	1.78329	1.30397	2.47902	52.4338	34.4867	81.7284
Rwanda	2030	1084.62	920.048	1301.4	6.72546	4.5778	10.1953	2.77664	2.03938	3.89543	90.6659	60.2939	138.329	970.514	824.726	1163.66	6.01789	4.09884	9.16355	2.48452	1.81265	3.48313	87.1194	57.9807	133.13	941.272	797.946	1134.3	5.83657	3.96316	8.90424	2.40966	1.76054	3.39526	87.4035	58.0723	133.604	780.701	662.252	936.652	4.84091	3.29509	7.33864	1.99859	1.46802	2.80365	65.2522	43.394	99.5595
Sao Tome and Principe	2021	0.0533533	0.0419013	0.06785	0	0	0	0.000136584	9.11682e-05	0.000201101	0	0	0	0.0384144	0.030169	0.048852	0	0	0	9.83408e-05	6.56411e-05	0.000144793	0	0	0	0.0234755	0.0184366	0.029854	0	0	0	6.00972e-05	4.0114e-05	8.84846e-05	0	0	0	0.0384144	0.030169	0.048852	0	0	0	9.83408e-05	6.56411e-05	0.000144793	0	0	0
Sao Tome and Principe	2022	0.107209	0.0882498	0.130459	0	0	0	0.000274455	0.00019418	0.000367353	6.63938e-05	4.25209e-05	9.46863e-05	0.0771906	0.0635399	0.0939306	0	0	0	0.000197608	0.00013981	0.000264494	4.78036e-05	3.0615e-05	6.81741e-05	0.0546415	0.0446966	0.0666763	0	0	0	0.000139882	9.874e-05	0.000188567	3.85086e-05	2.46622e-05	5.49183e-05	0.0771906	0.0635399	0.0939306	0	0	0	0.000197608	0.00013981	0.000264494	4.78036e-05	3.0615e-05	6.81741e-05
Sao Tome and Principe	2023	0.161725	0.136163	0.191528	0	0	0	0.000414016	0.00030111	0.000544475	0.000199807	0.000127804	0.000294541	0.116442	0.0980372	0.1379	0	0	0	0.000298092	0.000216799	0.000392022	0.000143861	9.20191e-05	0.000212069	0.0936376	0.0786451	0.111332	0	0	0	0.000239712	0.000175263	0.000311989	0.000134479	8.5951e-05	0.000198811	0.116442	0.0980372	0.1379	0	0	0	0.000298092	0.000216799	0.000392022	0.000143861	9.20191e-05	0.000212069
Sao Tome and Principe	2024	0.217025	0.180523	0.253125	0	0	0	0.000555584	0.000395626	0.000720322	0.000401062	0.000252062	0.000574978	0.156258	0.129976	0.182249	0	0	0	0.00040002	0.00028485	0.000518631	0.000288764	0.000181484	0.000413983	0.140611	0.116282	0.162764	0	0	0	0.000359964	0.000255473	0.000467625	0.000307152	0.000192552	0.000442083	0.156258	0.129976	0.182249	0	0	0	0.00040002	0.00028485	0.000518631	0.000288764	0.000181484	0.000413983
Sao Tome and Principe	2025	0.283095	0.238955	0.333904	0	0	0	0.000724724	0.000518325	0.000963332	0.000720306	0.000476594	0.0010254	0.221533	0.186015	0.262096	0	0	0	0.000567124	0.000406096	0.000759921	0.00060675	0.000405223	0.000874059	0.205597	0.169816	0.242143	0	0	0	0.000526328	0.000376183	0.000705322	0.000625264	0.000416365	0.000897085	0.203828	0.172047	0.24041	0	0	0	0.000521799	0.000373193	0.000693596	0.000518618	0.000343146	0.000738283
Sao Tome and Principe	2026	0.350397	0.297821	0.415626	0	0	0	0.000897017	0.000650517	0.00120251	0.00112223	0.000732081	0.00160246	0.287862	0.244019	0.342676	0	0	0	0.000736926	0.000536509	0.000995873	0.00100713	0.000659735	0.00143746	0.271574	0.229271	0.322291	0	0	0	0.00069523	0.000505944	0.000940088	0.00102583	0.000670989	0.00146605	0.252285	0.21443	0.299249	0	0	0	0.000645849	0.000468371	0.000865799	0.000808001	0.000527095	0.00115376
Sao Tome and Principe	2027	0.418564	0.357454	0.483142	0	0	0	0.00107152	0.000786448	0.00142537	0.00160851	0.00104486	0.00234251	0.355032	0.30286	0.410764	0	0	0	0.000908882	0.000670624	0.00121542	0.00149157	0.000971352	0.00217489	0.338487	0.285993	0.391581	0	0	0	0.000866526	0.000639579	0.00115874	0.00151049	0.000982731	0.00220381	0.301364	0.257365	0.34786	0	0	0	0.000771493	0.00056624	0.00102626	0.00115812	0.00075229	0.0016866
Sao Tome and Principe	2028	0.487932	0.414921	0.568605	0	0	0	0.00124911	0.000944092	0.0016711	0.00218035	0.00145128	0.00304491	0.423328	0.360366	0.493515	0	0	0	0.00108372	0.000826301	0.00145764	0.00206142	0.00137653	0.00289035	0.406507	0.34449	0.473848	0	0	0	0.00104066	0.000786866	0.00140003	0.00208067	0.00138811	0.00291344	0.351309	0.298741	0.409392	0	0	0	0.000899351	0.000679743	0.00120319	0.00156983	0.00104491	0.00219231
Sao Tome and Principe	2029	0.558514	0.477656	0.649838	0	0	0	0.0014298	0.00109315	0.00192018	0.00283932	0.00183982	0.00397861	0.492793	0.420051	0.573171	0	0	0	0.00126155	0.000962034	0.00170302	0.00271832	0.00176377	0.00381986	0.47569	0.403968	0.551765	0	0	0	0.00121777	0.000928762	0.00164443	0.00273798	0.0017756	0.00384569	0.402127	0.34391	0.467879	0	0	0	0.00102944	0.000787066	0.00138252	0.00204429	0.00132466	0.00286457
Sao Tome and Principe	2030	0.630305	0.540549	0.733227	0	0	0	0.00161358	0.0012229	0.00215954	0.00358717	0.00231561	0.00513376	0.563507	0.482104	0.6553	0	0	0	0.00144258	0.00110111	0.00193881	0.00346429	0.00223837	0.00497406	0.546082	0.463865	0.633494	0	0	0	0.00139797	0.00106842	0.00187913	0.00348416	0.00225032	0.0049979	0.453815	0.389192	0.527918	0	0	0	0.00116177	0.00088048	0.00155485	0.00258273	0.00166721	0.00369626
Senegal	2021	28.8643	19.1178	40.803	0.00613429	0.00361178	0.00968094	0.127458	0.0781569	0.194121	0.00613429	0.00361178	0.00968094	20.7823	13.7648	29.3782	0.00441669	0.00260048	0.00697028	0.0917697	0.056273	0.139767	0.00441669	0.00260048	0.00697028	12.7003	8.41183	17.9533	0.00269909	0.00158918	0.00425961	0.0560815	0.034389	0.0854132	0.00269909	0.00158918	0.00425961	20.7823	13.7648	29.3782	0.00441669	0.00260048	0.00697028	0.0917697	0.056273	0.139767	0.00441669	0.00260048	0.00697028
Senegal	2022	58.4244	43.0802	76.7712	0.0124165	0.00775841	0.0199723	0.257988	0.173476	0.388604	0.132295	0.0696102	0.220296	42.0656	31.0177	55.2753	0.00893984	0.00558606	0.01438	0.185752	0.124903	0.279795	0.0952522	0.0501194	0.158613	29.7477	22.0629	39.0699	0.00632204	0.00392928	0.0102229	0.131359	0.0879311	0.197561	0.0758555	0.0396778	0.126417	42.0656	31.0177	55.2753	0.00893984	0.00558606	0.01438	0.185752	0.124903	0.279795	0.0952522	0.0501194	0.158613
Senegal	2023	88.4424	65.2836	112.592	0.0187959	0.0111847	0.0292457	0.390541	0.271314	0.559624	0.381332	0.212869	0.616483	63.6779	47.0038	81.0656	0.0135329	0.00805292	0.0210568	0.281187	0.195345	0.402925	0.274554	0.153263	0.44386	51.1339	37.4905	64.5824	0.0108671	0.00636594	0.0168851	0.225795	0.157698	0.321069	0.254709	0.141262	0.417173	63.6779	47.0038	81.0656	0.0135329	0.00805292	0.0210568	0.281187	0.195345	0.402925	0.274554	0.153263	0.44386
Senegal	2024	118.93	91.9064	148.867	0.0252753	0.0156263	0.038504	0.525168	0.37689	0.745405	0.755142	0.470098	1.1268	85.628	66.1713	107.182	0.0181978	0.0112507	0.0277224	0.378113	0.271357	0.536677	0.543682	0.338458	0.811268	76.9284	60.0689	95.5198	0.016349	0.0101308	0.0246437	0.339698	0.244112	0.476222	0.574748	0.361668	0.858471	85.628	66.1713	107.182	0.0181978	0.0112507	0.0277224	0.378113	0.271357	0.536677	0.543682	0.338458	0.811268
Senegal	2025	151.743	118.017	185.039	0.0322487	0.0201068	0.0490004	0.670062	0.49951	0.922768	1.28698	0.812287	1.95959	117.855	90.9854	144.216	0.0250467	0.0156531	0.0380303	0.520419	0.386941	0.72289	1.07136	0.677997	1.63971	109.056	84.8527	135.27	0.0231767	0.0145211	0.034959	0.481565	0.359832	0.681806	1.10334	0.701865	1.6895	109.251	84.9699	133.223	0.0232183	0.0144764	0.0352792	0.482429	0.359638	0.664363	0.926576	0.584816	1.41081
Senegal	2026	185.178	143.22	229.313	0.0393544	0.0250024	0.058831	0.817703	0.610625	1.12541	1.95596	1.27541	2.94703	150.736	115.748	187.716	0.0320346	0.0204758	0.0480111	0.665614	0.501521	0.92229	1.73698	1.13902	2.62216	141.774	109.5	178.466	0.03013	0.0193225	0.045226	0.62604	0.473448	0.880433	1.76945	1.16326	2.67273	133.322	103.114	165.097	0.0283338	0.0180009	0.042356	0.588718	0.439635	0.810248	1.40819	0.918229	2.12168
Senegal	2027	218.943	172.733	264.552	0.0465302	0.0309791	0.0699765	0.966802	0.730901	1.30652	2.76434	1.84608	4.20547	183.991	144.852	223.798	0.0391021	0.0263859	0.0589969	0.812462	0.614775	1.08747	2.54184	1.68685	3.87539	174.929	138.536	213.586	0.0371763	0.0252203	0.0561812	0.772446	0.585414	1.03976	2.57478	1.71749	3.92669	157.63	124.361	190.464	0.0334998	0.0223036	0.0503796	0.696056	0.526225	0.940622	1.99014	1.32904	3.02761
Senegal	2028	253.182	208.285	306.875	0.0538066	0.0367991	0.0819651	1.11799	0.849427	1.49512	3.71351	2.55831	5.77749	217.727	179.201	265.176	0.0462718	0.0321403	0.0708274	0.961432	0.728651	1.28498	3.48758	2.39658	5.44231	208.563	170.781	254.515	0.0443242	0.0307973	0.06798	0.920966	0.698975	1.24223	3.52114	2.42775	5.49455	182.277	149.954	220.931	0.0387379	0.0264933	0.0590097	0.804894	0.611552	1.07639	2.67343	1.84176	4.15925
Senegal	2029	287.903	239.407	345.507	0.0611857	0.0417222	0.0895782	1.27131	0.970403	1.72006	4.80544	3.16833	6.91799	251.949	209.528	302.071	0.0535447	0.0362773	0.0782832	1.11255	0.84681	1.50794	4.57615	3.00416	6.57718	242.677	203.009	292.509	0.0515741	0.0348931	0.0754022	1.0716	0.816796	1.46472	4.61044	3.03597	6.62351	207.272	172.359	248.741	0.0440499	0.0300372	0.06449	0.915265	0.698641	1.2383	3.45946	2.28087	4.98038
Senegal	2030	323.133	272.774	385.199	0.0686727	0.0477776	0.0995444	1.42688	1.09322	1.8954	6.04223	4.19115	8.64745	286.709	243.717	342.271	0.0609319	0.042334	0.088024	1.26604	0.965638	1.68054	5.81023	4.02506	8.30252	277.283	237.15	332.805	0.0589286	0.0409264	0.0850331	1.22441	0.935111	1.63656	5.84475	4.05713	8.34917	232.632	196.378	277.313	0.0494394	0.0343962	0.0716657	1.02725	0.787054	1.36451	4.34975	3.01712	6.22534
Sierra Leone	2021	97.5865	53.3858	167.584	0.15992	0.0783339	0.317844	0.598186	0.289063	1.05736	0.15992	0.0783339	0.317844	70.2623	38.4378	120.66	0.115142	0.0564004	0.228848	0.430694	0.208125	0.7613	0.115142	0.0564004	0.228848	42.938	23.4897	73.7369	0.0703647	0.0344669	0.139851	0.263202	0.127188	0.465239	0.0703647	0.0344669	0.139851	70.2623	38.4378	120.66	0.115142	0.0564004	0.228848	0.430694	0.208125	0.7613	0.115142	0.0564004	0.228848
Sierra Leone	2022	194.702	120.153	318.721	0.319067	0.171857	0.637506	1.19348	0.764807	2.25679	5.23338	2.43454	11.0155	140.185	86.5104	229.479	0.229728	0.123737	0.459005	0.859307	0.550661	1.62489	3.76803	1.75287	7.93112	99.3308	61.2662	163.289	0.162778	0.0876264	0.326611	0.608878	0.389448	1.16408	3.0148	1.39558	6.35483	140.185	86.5104	229.479	0.229728	0.123737	0.459005	0.859307	0.550661	1.62489	3.76803	1.75287	7.93112
Sierra Leone	2023	292.192	206.796	437.752	0.478829	0.279456	0.835571	1.79108	1.09695	3.07799	15.203	7.6121	27.5172	210.357	148.883	315.138	0.344723	0.201193	0.60155	1.28945	0.789747	2.21587	10.944	5.47971	19.8085	169.444	114.912	258.012	0.277676	0.156317	0.482769	1.03866	0.609549	1.75467	10.1957	5.06826	18.8003	210.357	148.883	315.138	0.344723	0.201193	0.60155	1.28945	0.789747	2.21587	10.944	5.47971	19.8085
Sierra Leone	2024	390.032	284.776	552.283	0.639166	0.373998	1.06891	2.39082	1.60048	3.84205	30.0838	16.3783	52.1506	280.762	205.005	397.538	0.460099	0.269229	0.769404	1.72102	1.15215	2.76529	21.652	11.7882	37.5304	253.329	183.485	356.165	0.415143	0.237328	0.70265	1.55286	1.04143	2.52329	22.9918	12.6055	40.2398	280.762	205.005	397.538	0.460099	0.269229	0.769404	1.72102	1.15215	2.76529	21.652	11.7882	37.5304
Sierra Leone	2025	489.58	364.266	706.496	0.8023	0.492586	1.36153	3.00103	2.01154	4.97153	50.1606	27.252	86.9262	380.073	279.332	553.248	0.622844	0.383508	1.06616	2.32977	1.54252	3.89315	41.7333	22.0538	73.2599	352.388	256.511	515.432	0.577475	0.353766	0.988178	2.16007	1.4165	3.62704	43.0579	22.2049	75.0706	352.375	262.207	508.384	0.577454	0.354553	0.979945	2.15999	1.44795	3.57744	36.0946	19.6092	62.5496
Sierra Leone	2026	589.513	460.791	813.231	0.966065	0.621262	1.60026	3.6136	2.54458	5.68738	75.2435	42.126	123.435	479.505	372.271	674.494	0.785789	0.515783	1.30355	2.93927	2.0734	4.60707	66.7781	36.9044	109.707	451.689	352.539	633.307	0.740206	0.462545	1.2252	2.76877	1.94679	4.28071	68.1088	37.0562	111.526	424.244	331.646	585.152	0.695229	0.447116	1.15164	2.60053	1.83141	4.09205	54.1334	30.3052	88.8055
Sierra Leone	2027	689.876	565.16	949.568	1.13053	0.712525	1.86119	4.2288	3.07477	6.45492	105.351	66.0754	172.832	579.353	458.863	810.179	0.949415	0.60655	1.56308	3.55132	2.49646	5.41031	96.8473	58.6205	159.745	551.392	428.963	768.774	0.903594	0.57406	1.48433	3.37992	2.33378	5.16967	98.1835	59.7933	162.459	496.401	406.733	683.138	0.813478	0.512747	1.33923	3.04284	2.21284	4.64335	75.7791	47.5241	124.284
Sierra Leone	2028	790.682	665.182	1066.58	1.29573	0.848465	2.10945	4.84672	3.57501	7.17826	140.5	92.4007	233.765	679.619	566.06	926.511	1.11373	0.74197	1.80989	4.16593	3.07966	6.12566	131.957	86.1627	224.24	651.508	535.998	884.884	1.06766	0.709307	1.73071	3.99361	2.91611	5.88664	133.299	86.9715	225.228	568.856	478.546	767.202	0.932214	0.610477	1.51768	3.48698	2.57256	5.1629	101.043	66.4408	168.087
Sierra Leone	2029	891.928	762.294	1205.63	1.46165	1.01898	2.33045	5.46734	3.95617	8.15333	180.711	119.96	304.704	780.309	659.457	1064.29	1.27873	0.901589	2.02938	4.78314	3.46269	7.09545	172.125	112.138	295.133	752.048	629.236	1020.6	1.23242	0.846856	1.94979	4.60991	3.3346	6.85516	173.473	113.321	296.125	641.608	548.461	867.055	1.05143	0.733039	1.67648	3.93293	2.84659	5.86292	129.935	86.2674	219.048
Sierra Leone	2030	993.595	858.053	1365.34	1.62825	1.1415	2.60593	6.09054	4.41004	8.86981	226.001	150.75	374.463	881.414	759.399	1223.29	1.44442	1.00218	2.33712	5.40289	3.91406	7.80658	217.372	145.427	362.893	853.014	730.497	1179.39	1.39788	0.94718	2.25387	5.22881	3.78534	7.5651	218.726	145.58	364.919	714.642	617.33	981.72	1.17112	0.821038	1.874	4.38061	3.17282	6.37714	162.468	108.368	269.196
South Africa	2021	0.0110865	0.00855576	0.0141983	5.02704e-07	3.06478e-07	7.38973e-07	0.000134908	9.16055e-05	0.000183118	5.02704e-07	3.06478e-07	7.38973e-07	0.00798232	0.00616014	0.0102228	3.61947e-07	2.20664e-07	5.32061e-07	9.71335e-05	6.59559e-05	0.000131845	3.61947e-07	2.20664e-07	5.32061e-07	0.00487808	0.00376453	0.00624726	2.2119e-07	1.3485e-07	3.25148e-07	5.93593e-05	4.03064e-05	8.05717e-05	2.2119e-07	1.3485e-07	3.25148e-07	0.00798232	0.00616014	0.0102228	3.61947e-07	2.20664e-07	5.32061e-07	9.71335e-05	6.59559e-05	0.000131845	3.61947e-07	2.20664e-07	5.32061e-07
South Africa	2022	0.0222542	0.0184052	0.0275929	1.00909e-06	6.52542e-07	1.41342e-06	0.000270803	0.000195344	0.000355739	5.88058e-06	3.76109e-06	8.34576e-06	0.0160231	0.0132517	0.0198669	7.26542e-07	4.6983e-07	1.01767e-06	0.000194978	0.000140648	0.000256132	4.23402e-06	2.70798e-06	6.00895e-06	0.011344	0.00934648	0.0140016	5.14377e-07	3.35253e-07	7.19911e-07	0.00013804	0.000100374	0.000182627	3.33984e-06	2.13098e-06	4.75897e-06	0.0160231	0.0132517	0.0198669	7.26542e-07	4.6983e-07	1.01767e-06	0.000194978	0.000140648	0.000256132	4.23402e-06	2.70798e-06	6.00895e-06
South Africa	2023	0.0334003	0.0275787	0.0389745	1.51449e-06	9.89377e-07	2.09241e-06	0.000406435	0.000287324	0.000537434	1.61646e-05	1.0089e-05	2.39996e-05	0.0240482	0.0198567	0.0280616	1.09043e-06	7.12351e-07	1.50653e-06	0.000292633	0.000206873	0.000386953	1.16385e-05	7.2641e-06	1.72797e-05	0.0193639	0.0157817	0.0228384	8.78026e-07	5.66788e-07	1.23653e-06	0.000235631	0.000165801	0.000312483	1.07391e-05	6.68381e-06	1.60635e-05	0.0240482	0.0198567	0.0280616	1.09043e-06	7.12351e-07	1.50653e-06	0.000292633	0.000206873	0.000386953	1.16385e-05	7.2641e-06	1.72797e-05
South Africa	2024	0.0445243	0.0371713	0.0514709	2.01889e-06	1.33743e-06	2.8065e-06	0.000541798	0.000383235	0.000713973	3.13453e-05	1.9986e-05	4.45296e-05	0.0320575	0.0267633	0.037059	1.4536e-06	9.62953e-07	2.02068e-06	0.000390094	0.000275929	0.000514061	2.25686e-05	1.43899e-05	3.20613e-05	0.0289344	0.0240357	0.0335885	1.31199e-06	8.73909e-07	1.83763e-06	0.000352091	0.00024877	0.000464362	2.37874e-05	1.49613e-05	3.40995e-05	0.0320575	0.0267633	0.037059	1.4536e-06	9.62953e-07	2.02068e-06	0.000390094	0.000275929	0.000514061	2.25686e-05	1.43899e-05	3.20613e-05
South Africa	2025	0.0564439	0.0481126	0.0655119	2.55937e-06	1.7014e-06	3.68235e-06	0.000686843	0.000483717	0.000900128	5.28953e-05	3.51103e-05	7.94296e-05	0.0439741	0.0372628	0.0510989	1.99394e-06	1.32679e-06	2.89616e-06	0.000535102	0.00037639	0.000700172	4.40965e-05	2.9486e-05	6.69257e-05	0.0408729	0.034398	0.0476047	1.85332e-06	1.24127e-06	2.71456e-06	0.000497366	0.000349418	0.000650821	4.53326e-05	3.00838e-05	6.899e-05	0.0406396	0.034641	0.0471686	1.84275e-06	1.22501e-06	2.65129e-06	0.000494527	0.000348277	0.000648092	3.80846e-05	2.52794e-05	5.71893e-05
South Africa	2026	0.0683865	0.0577558	0.0793333	3.10089e-06	2.08142e-06	4.49718e-06	0.000832167	0.000580087	0.00107952	7.96944e-05	5.33637e-05	0.00011974	0.0559316	0.0469179	0.064937	2.53614e-06	1.69787e-06	3.71192e-06	0.000680609	0.000472893	0.000879806	7.0913e-05	4.73188e-05	0.000107261	0.0528264	0.0440488	0.0614375	2.39534e-06	1.60642e-06	3.53003e-06	0.000642823	0.00044589	0.000830391	7.21465e-05	4.8352e-05	0.000109321	0.0492383	0.0415842	0.05712	2.23264e-06	1.49862e-06	3.23797e-06	0.00059916	0.000417662	0.000777256	5.73799e-05	3.84219e-05	8.62131e-05
South Africa	2027	0.0802562	0.0682498	0.0929377	3.6391e-06	2.4346e-06	5.23521e-06	0.000976604	0.000693395	0.00125895	0.000111735	7.44005e-05	0.000163684	0.0678301	0.0575118	0.0785764	3.07566e-06	2.05197e-06	4.4518e-06	0.000825397	0.000586437	0.00105969	0.000102968	6.83653e-05	0.000151225	0.0647395	0.0545145	0.0750945	2.93552e-06	1.96099e-06	4.27081e-06	0.000787787	0.000559551	0.00101192	0.000104197	6.93953e-05	0.000153279	0.0577844	0.0491398	0.0669151	2.62015e-06	1.75291e-06	3.76935e-06	0.000703155	0.000499244	0.000906441	8.04492e-05	5.35683e-05	0.000117853
South Africa	2028	0.0920953	0.0787502	0.106332	4.17593e-06	2.7542e-06	6.0566e-06	0.00112067	0.000786478	0.00143926	0.000148987	9.73323e-05	0.000220649	0.0797001	0.0684011	0.0920045	3.61388e-06	2.38183e-06	5.27514e-06	0.000969837	0.000679795	0.00124049	0.000140235	9.13871e-05	0.000208213	0.0766237	0.0653065	0.0885384	3.47439e-06	2.29699e-06	5.09501e-06	0.000932402	0.000653037	0.00119531	0.000141465	9.22435e-05	0.000210266	0.0663086	0.0567001	0.076559	3.00667e-06	1.98303e-06	4.36075e-06	0.000806882	0.000566264	0.00103626	0.000107271	7.00792e-05	0.000158867
South Africa	2029	0.103906	0.0883448	0.119765	4.71148e-06	3.09271e-06	6.78826e-06	0.00126439	0.000893786	0.00159745	0.000191436	0.000124179	0.000278636	0.0915417	0.0780212	0.105704	4.15083e-06	2.72125e-06	6.00861e-06	0.00111393	0.000787367	0.00139918	0.000182701	0.000118245	0.00026622	0.0884791	0.0753868	0.102147	4.01196e-06	2.63681e-06	5.82935e-06	0.00107667	0.000760728	0.00135262	0.000183936	0.000119105	0.00026828	0.0748125	0.0636082	0.0862307	3.39227e-06	2.22675e-06	4.88755e-06	0.000910362	0.000643526	0.00115017	0.000137834	8.94089e-05	0.000200618
South Africa	2030	0.115697	0.0998018	0.13222	5.24613e-06	3.44646e-06	7.44e-06	0.00140787	0.00100358	0.00178951	0.000239077	0.000155706	0.000337115	0.103374	0.0891534	0.118206	4.68735e-06	3.07625e-06	6.66302e-06	0.00125792	0.000897515	0.00159191	0.00023038	0.000149798	0.000325547	0.100311	0.0865115	0.114649	4.54846e-06	2.99178e-06	6.48366e-06	0.00122064	0.000870874	0.00154316	0.000231603	0.00015065	0.000327287	0.0833021	0.0718572	0.0951984	3.77721e-06	2.48145e-06	5.3568e-06	0.00101367	0.000722577	0.00128845	0.000172135	0.000112108	0.000242723
South Sudan	2021	128.408	72.8769	228.034	0.807029	0.350628	1.65286	0.437394	0.242443	0.820072	0.807029	0.350628	1.65286	92.4535	52.4714	164.184	0.581061	0.252452	1.19006	0.314923	0.174559	0.590452	0.581061	0.252452	1.19006	56.4994	32.0658	100.335	0.355093	0.154276	0.72726	0.192453	0.106675	0.360832	0.355093	0.154276	0.72726	92.4535	52.4714	164.184	0.581061	0.252452	1.19006	0.314923	0.174559	0.590452	0.581061	0.252452	1.19006
South Sudan	2022	257.501	147.532	428.309	1.61836	0.800618	3.18792	0.877121	0.482939	1.52667	5.16535	2.49957	10.1206	185.4	106.223	308.383	1.16522	0.576445	2.2953	0.631527	0.347716	1.0992	3.71905	1.79969	7.28683	131.277	75.1531	216.628	0.825064	0.406364	1.62367	0.447168	0.243516	0.77215	2.88293	1.39194	5.64648	185.4	106.223	308.383	1.16522	0.576445	2.2953	0.631527	0.347716	1.0992	3.71905	1.79969	7.28683
South Sudan	2023	388.861	251.499	602.69	2.44395	1.29057	4.54585	1.32457	0.805428	2.10981	13.1056	7.22509	25.1654	279.966	181.073	433.905	1.75956	0.929177	3.27278	0.953647	0.579889	1.51894	9.4352	5.20175	18.1168	225.099	147.464	352.207	1.41472	0.756711	2.65656	0.766753	0.472254	1.21496	8.59238	4.79049	16.7033	279.966	181.073	433.905	1.75956	0.929177	3.27278	0.953647	0.579889	1.51894	9.4352	5.20175	18.1168
South Sudan	2024	522.632	383.608	805.361	3.28469	2.03537	6.07452	1.78024	1.17488	2.7705	24.69	14.6403	46.2375	376.255	276.176	579.778	2.36472	1.46534	4.37304	1.28163	0.845849	1.99443	17.7736	10.5387	33.2833	338.352	252.36	523.841	2.12651	1.35573	3.95113	1.15252	0.7435	1.7812	18.52	10.8161	34.7653	376.255	276.176	579.778	2.36472	1.46534	4.37304	1.28163	0.845849	1.99443	17.7736	10.5387	33.2833
South Sudan	2025	661.993	507.588	963.391	4.16056	2.72663	7.06433	2.25494	1.51238	3.53789	40.3868	25.5753	71.2249	513.479	391.1	755.921	3.22716	2.14907	5.409	1.74906	1.16849	2.77599	33.3875	20.736	59.4493	474.717	360.213	710.648	2.98355	1.98567	5.08457	1.61702	1.07778	2.60973	34.1264	21.2962	61.038	476.553	365.42	693.464	2.99509	1.96291	5.08533	1.62328	1.08879	2.54663	29.0704	18.4097	51.2633
South Sudan	2026	803.66	647.534	1158.52	5.05092	3.37153	8.73825	2.7375	1.92371	4.16866	59.9473	38.0466	100.383	652.544	519.835	925.596	4.10117	2.78271	6.98141	2.22276	1.54377	3.40034	52.8231	32.742	87.0345	613.148	477.31	878.018	3.85357	2.63002	6.5429	2.08856	1.46721	3.22437	53.5764	33.0852	88.5346	578.497	466.136	833.888	3.6358	2.42707	6.28968	1.97053	1.38484	3.00043	43.146	27.3823	72.2414
South Sudan	2027	945.941	783.556	1376.05	5.94514	4.10329	10.379	3.22215	2.30188	5.04634	83.4281	55.4016	143.573	792.703	653.558	1139.88	4.98206	3.50684	8.59764	2.70018	1.91636	4.28668	76.1816	50.0072	129.996	753.154	609.77	1081.56	4.73349	3.3155	8.15777	2.56546	1.83962	4.0322	76.9535	50.3613	131.533	680.868	564.029	990.379	4.27919	2.95362	7.47004	2.31923	1.65699	3.63167	60.04	39.8686	103.312
South Sudan	2028	1089.48	880.42	1550.31	6.84724	4.67463	11.6934	3.71107	2.62325	5.75045	110.849	74.9373	183.385	934.456	759.908	1311.3	5.87296	4.06987	9.89061	3.18303	2.26418	4.98188	103.5	69.4687	171.575	894.779	726.297	1252.79	5.6236	3.94909	9.44928	3.04788	2.17109	4.72598	104.294	69.8371	173.062	784.127	633.728	1115.72	4.92816	3.36475	8.41545	2.67096	1.88822	4.13802	79.7661	53.9222	131.949
South Sudan	2029	1234.28	1029.09	1700.54	7.75731	5.45616	12.8265	4.20431	3.14151	6.52527	142.243	96.4349	241.664	1077.73	892.005	1459.22	6.77344	4.73792	11.0902	3.67107	2.73466	5.74976	134.811	90.3467	229.747	1037.86	840.557	1412.46	6.52282	4.57036	10.7619	3.53524	2.63579	5.49211	135.626	91.0611	231.42	888.283	740.675	1223.76	5.58277	3.9264	9.23033	3.02575	2.26112	4.69509	102.347	69.39	173.861
South Sudan	2030	1380.48	1150.87	1859.22	8.67617	5.96741	14.3903	4.70231	3.44243	7.23552	177.643	121.5	311.306	1222.67	1018.07	1628.65	7.68438	5.35233	12.8669	4.16478	3.00662	6.41389	170.161	116.251	299.312	1182.32	966.898	1594.55	7.43074	5.25731	12.5343	4.02731	2.90651	6.2246	170.975	116.342	300.984	993.432	828.272	1337.86	6.24362	4.2947	10.3544	3.38392	2.4776	5.2057	127.806	87.4126	223.934
Togo	2021	68.0884	43.1527	97.9125	0.335279	0.178288	0.601543	0.174306	0.101839	0.278531	0.335279	0.178288	0.601543	49.0237	31.07	70.497	0.241401	0.128367	0.433111	0.125501	0.0733242	0.200542	0.241401	0.128367	0.433111	29.9589	18.9872	43.0815	0.147523	0.0784466	0.264679	0.0766948	0.0448092	0.122553	0.147523	0.0784466	0.264679	49.0237	31.07	70.497	0.241401	0.128367	0.433111	0.125501	0.0733242	0.200542	0.241401	0.128367	0.433111
Togo	2022	137.076	92.1609	195.44	0.674985	0.384549	1.20229	0.350915	0.222034	0.54247	2.51872	1.40756	4.6378	98.6948	66.3559	140.717	0.48599	0.276875	0.86565	0.252659	0.159865	0.390578	1.81348	1.01345	3.33921	69.8459	46.9837	99.6112	0.343933	0.197745	0.616484	0.178805	0.113083	0.276484	1.41348	0.787212	2.60948	98.6948	66.3559	140.717	0.48599	0.276875	0.86565	0.252659	0.159865	0.390578	1.81348	1.01345	3.33921
Togo	2023	207.125	148.931	279.933	1.01992	0.623979	1.71341	0.530239	0.347823	0.786118	6.57599	3.78614	11.2327	149.126	107.228	201.545	0.73432	0.449255	1.23361	0.381762	0.250428	0.565983	4.73448	2.72588	8.08705	119.85	87.5687	159.833	0.590161	0.364039	0.996196	0.306816	0.204221	0.458825	4.32915	2.45766	7.37174	149.126	107.228	201.545	0.73432	0.449255	1.23361	0.381762	0.250428	0.565983	4.73448	2.72588	8.08705
Togo	2024	278.275	216.558	358.412	1.37027	0.869357	2.20982	0.712385	0.497557	0.994818	12.5356	7.89015	19.6337	200.346	155.914	258.037	0.986539	0.6259	1.59095	0.512887	0.358224	0.716214	9.02474	5.68032	14.1345	180.14	143.212	231.002	0.887038	0.561169	1.41574	0.461158	0.319397	0.636749	9.4349	5.94685	14.5629	200.346	155.914	258.037	0.986539	0.6259	1.59095	0.512887	0.358224	0.716214	9.02474	5.68032	14.1345
Togo	2025	355.67	289.086	448.499	1.75138	1.13228	2.67395	0.910515	0.655821	1.26705	21.0067	13.7811	32.7455	276.556	223.033	348.974	1.36181	0.879153	2.08628	0.707983	0.50528	0.98734	17.4452	11.2862	27.4237	255.998	207.532	325.009	1.26058	0.82281	1.94176	0.655355	0.463124	0.906167	17.8594	11.5359	28.086	256.057	208.124	322.879	1.26087	0.81517	1.92503	0.655507	0.472156	0.912161	15.1225	9.92071	23.5726
Togo	2026	434.503	350.322	551.459	2.13957	1.39667	3.32043	1.11233	0.835836	1.5803	31.5872	20.7854	50.449	354.067	283.171	452.219	1.74348	1.1454	2.72297	0.906411	0.677192	1.29591	27.9691	18.5085	45.3654	333.111	268.015	427.305	1.64029	1.07826	2.57567	0.852763	0.639645	1.2132	28.3892	18.7814	46.0372	312.8	252.201	396.98	1.54028	1.00547	2.39034	0.800768	0.601742	1.13761	22.738	14.9624	36.3145
Togo	2027	514.331	425.461	657.792	2.53265	1.69805	3.94959	1.31669	0.974607	1.77212	44.3146	28.659	71.9133	432.613	355.975	555.135	2.13026	1.41922	3.37179	1.10749	0.806744	1.4965	40.637	25.7613	66.7674	411.358	334.916	533.314	2.02559	1.36046	3.20925	1.05308	0.773346	1.44048	41.0631	26.1834	67.449	370.254	306.288	473.513	1.82319	1.22239	2.84316	0.94785	0.701623	1.27564	31.8981	20.6302	51.7627
Togo	2028	595.413	497.589	763.601	2.93191	1.97414	4.60236	1.52426	1.12219	2.04778	59.2173	38.292	96.3975	512.392	428.25	659.285	2.5231	1.67402	4.01543	1.31172	0.951584	1.76272	55.4791	35.3455	91.1678	490.835	409.165	637.156	2.41695	1.61443	3.85057	1.25654	0.917713	1.68081	55.9132	35.7752	91.862	428.606	358.192	549.654	2.11053	1.42114	3.31291	1.09723	0.80784	1.47401	42.6228	27.5632	69.382
Togo	2029	677.745	574.996	865.436	3.33733	2.2909	5.20183	1.73503	1.31362	2.32116	76.3288	52.6654	121.636	593.412	502.128	759.471	2.92206	2.00607	4.60551	1.51913	1.14034	2.0381	72.5294	49.6712	116.319	571.551	482.256	737.043	2.81441	1.94569	4.43833	1.46317	1.10601	1.95501	72.9733	50.11	117.029	487.853	413.896	622.929	2.40227	1.64903	3.74427	1.2489	0.945608	1.67071	54.9361	37.9073	87.5422
Togo	2030	761.326	648.482	966.365	3.7489	2.57197	5.91548	1.94899	1.45979	2.66729	95.6845	66.643	155.485	675.743	578.823	858.836	3.32747	2.29795	5.31038	1.7299	1.30398	2.38949	91.8308	63.6061	150.093	653.522	557.575	836.029	3.21805	2.23655	5.14044	1.67302	1.2654	2.30506	92.2791	64.0496	150.81	547.994	466.776	695.544	2.69841	1.85128	4.25775	1.40286	1.05081	1.91973	68.8631	47.966	111.896
Uganda	2021	544.919	363.991	904.929	7.75524	4.50094	16.1094	1.39499	0.795765	2.52964	7.75524	4.50094	16.1094	392.342	262.074	651.549	5.58377	3.24068	11.5987	1.00439	0.572951	1.82134	5.58377	3.24068	11.5987	239.764	160.156	398.169	3.4123	1.98041	7.08812	0.613797	0.350137	1.11304	3.4123	1.98041	7.08812	392.342	262.074	651.549	5.58377	3.24068	11.5987	1.00439	0.572951	1.82134	5.58377	3.24068	11.5987
Uganda	2022	1093.14	803.531	1678.23	15.5575	9.33861	28.9514	2.79844	1.86789	4.70304	49.2991	28.7639	92.5641	787.062	578.542	1208.33	11.2014	6.7238	20.845	2.01488	1.34488	3.38619	35.4953	20.71	66.6461	557.271	403.852	852.199	7.93103	4.7631	14.7014	1.42661	0.971279	2.38116	27.5053	15.8709	52.2768	787.062	578.542	1208.33	11.2014	6.7238	20.845	2.01488	1.34488	3.38619	35.4953	20.71	66.6461
Uganda	2023	1643.49	1312.75	2431.01	23.39	15.2856	41.1905	4.20733	3.07607	6.7854	124.831	76.7406	243.68	1183.27	945.146	1750.24	16.8402	11.0053	29.656	3.02917	2.21471	4.88522	89.8728	55.2493	175.438	952.383	764.447	1422.09	13.5542	8.76568	24.6377	2.4381	1.78368	3.91854	81.8426	49.5271	161.007	1183.27	945.146	1750.24	16.8402	11.0053	29.656	3.02917	2.21471	4.88522	89.8728	55.2493	175.438
Uganda	2024	2196.38	1727.86	3067.5	31.2586	21.207	53.155	5.62273	4.01642	8.69016	234.48	147.755	399.67	1581.27	1243.99	2208.38	22.5045	15.2678	38.2678	4.04806	2.89167	6.25624	168.804	106.367	287.715	1425.6	1101.46	1966.17	20.2891	13.4274	34.5314	3.64954	2.51964	5.54723	176.009	110.514	303.813	1581.27	1243.99	2208.38	22.5045	15.2678	38.2678	4.04806	2.89167	6.25624	168.804	106.367	287.715
Uganda	2025	2759.42	2258.48	3796.22	39.2719	27.093	67.3367	7.06413	5.27221	10.1256	379.996	260.578	657.241	2140.81	1771.87	2962.32	30.4678	21.1207	52.3637	5.48048	4.07628	7.9562	313.982	211.589	544.723	1984.03	1626.21	2781.59	28.2365	19.5831	48.5985	5.07912	3.75487	7.36541	321.229	211.571	560.903	1986.54	1625.95	2732.86	28.2723	19.5043	48.4749	5.08555	3.79563	7.28932	273.544	187.568	473.099
Uganda	2026	3326.03	2877.9	4481.18	47.3357	32.9472	80.5794	8.51464	6.36326	12.5012	560.421	364.571	953.442	2703.81	2328.79	3692.98	38.4803	26.9396	65.521	6.92175	5.16025	10.3813	494.07	315.314	840.367	2545.72	2144.3	3513.04	36.2304	25.3891	61.7246	6.51704	4.84893	9.71708	501.321	315.266	856.577	2394.34	2071.76	3225.83	34.076	23.7174	58.0051	6.12951	4.58093	8.99881	403.398	262.404	686.258
Uganda	2027	3901.91	3351.86	5169.79	55.5317	37.9562	94.9078	9.9889	7.4944	14.9697	776.045	521.96	1330.17	3274.08	2834.98	4359.67	46.5964	31.8956	79.7079	8.38165	6.28083	12.8297	709.262	472.371	1216.36	3113.22	2682.85	4168.44	44.3071	30.3197	75.8384	7.96985	5.96455	12.154	716.511	472.286	1232.58	2808.77	2412.85	3721.26	39.9742	27.3219	68.3153	7.19046	5.39502	10.775	558.568	375.654	957.332
Uganda	2028	4485.69	3802.09	5851.67	63.84	44.427	110.021	11.4834	8.74819	16.8299	1027.41	718.399	1789.03	3850.76	3223.2	5012.98	54.8037	38.2967	94.6543	9.85795	7.52076	14.6645	960.017	665.432	1674.22	3686.94	3078.55	4813.44	52.4722	36.6919	90.714	9.43857	7.19876	13.9769	967.254	668.144	1690.47	3228.85	2736.88	4211.86	45.9526	31.9778	79.1888	8.26585	6.29731	12.1133	739.444	516.99	1287.47
Uganda	2029	5077.18	4394.29	6584.22	72.258	51.7323	125.191	12.9976	10.0623	19.1008	1315.01	875.075	2308.83	4434.16	3831.47	5763.24	63.1065	45.1738	109.631	11.3514	8.81875	16.9083	1246.84	815.728	2192.73	4267.54	3634.45	5568.43	60.7353	43.4009	105.623	10.9249	8.49141	16.2094	1254.07	822.416	2209	3654.43	3162.94	4738.63	52.0096	37.2335	90.1025	9.35535	7.24292	13.7468	946.368	629.76	1661.4
Uganda	2030	5675.44	4945.05	7401.01	80.7724	58.3878	138.136	14.5291	11.3934	21.4592	1639.29	1108.13	2798.59	5023.43	4350.44	6560.05	71.4929	51.508	122.358	12.86	10.1326	19.2363	1570.09	1048.33	2680.72	4855.11	4201.79	6331.63	69.0974	49.2489	118.311	12.4291	9.80171	18.5301	1577.46	1055.57	2697.32	4084.85	3559.28	5326.16	58.1352	42.0212	99.4139	10.4572	8.20073	15.443	1179.66	797.454	2013.68
United Republic of Tanzania	2021	295.59	183.772	471.373	2.14697	1.1249	3.76744	1.01762	0.58532	1.74533	2.14697	1.1249	3.76744	212.825	132.316	339.389	1.54582	0.80993	2.71256	0.732685	0.42143	1.25663	1.54582	0.80993	2.71256	130.06	80.8599	207.404	0.944669	0.494957	1.65767	0.447752	0.257541	0.767943	0.944669	0.494957	1.65767	212.825	132.316	339.389	1.54582	0.80993	2.71256	0.732685	0.42143	1.25663	1.54582	0.80993	2.71256
United Republic of Tanzania	2022	596.201	419.623	861.386	4.33042	2.49062	7.02373	2.05252	1.21417	3.21	13.5987	7.62027	23.0647	429.264	302.129	620.198	3.1179	1.79325	5.05709	1.47782	0.874202	2.3112	9.79105	5.48659	16.6066	303.711	212.587	441.729	2.20596	1.27084	3.59836	1.04558	0.615115	1.61839	7.5822	4.19528	12.9908	429.264	302.129	620.198	3.1179	1.79325	5.05709	1.47782	0.874202	2.3112	9.79105	5.48659	16.6066
United Republic of Tanzania	2023	903.068	671.905	1237.62	6.5593	3.78785	10.636	3.10896	2.07411	4.68272	34.5234	18.9822	57.8932	650.196	483.764	891.062	4.72261	2.72722	7.65769	2.23841	1.49335	3.37145	24.856	13.6668	41.6818	522.176	383.021	722.445	3.79275	2.15928	6.1561	1.79768	1.19222	2.69581	22.6078	12.3013	38.0743	650.196	483.764	891.062	4.72261	2.72722	7.65769	2.23841	1.49335	3.37145	24.856	13.6668	41.6818
United Republic of Tanzania	2024	1216.32	899.63	1631.11	8.83455	5.64394	14.4615	4.18738	2.82774	6.06891	65.1168	39.573	111.703	875.712	647.715	1174.33	6.3606	4.06347	10.4117	3.01478	2.03591	4.36936	46.8807	28.4905	80.4192	786.392	569.332	1064.72	5.71184	3.68274	9.51558	2.70729	1.77153	3.99893	48.7806	29.0174	84.9063	875.712	647.715	1174.33	6.3606	4.06347	10.4117	3.01478	2.03591	4.36936	46.8807	28.4905	80.4192
United Republic of Tanzania	2025	1542.87	1141.95	2039.72	11.2064	7.13096	17.5759	5.3116	3.49417	7.75801	106.476	65.232	165.306	1195.45	881.421	1585.65	8.683	5.42382	13.7009	4.11555	2.68633	6.02791	87.8926	53.9357	138.144	1104.09	794.244	1480.36	8.0194	5.11926	12.5229	3.80101	2.41609	5.51203	89.8149	54.4644	139.727	1110.79	822.153	1468.49	8.06809	5.134	12.6535	3.82409	2.51569	5.5852	76.6543	46.9619	119.002
United Republic of Tanzania	2026	1876.65	1485.17	2515.12	13.6308	9.23094	21.6136	6.46069	4.46172	9.35809	158.139	107.843	253.107	1521.82	1185.65	2039.29	11.0535	7.54734	17.3953	5.23911	3.63658	7.58764	139.165	94.2469	220.562	1428.41	1109.02	1924.62	10.3751	7.06741	16.4573	4.91754	3.36031	7.16098	141.127	95.6351	225.205	1351.06	1069.24	1810.66	9.81324	6.64569	15.5601	4.65126	3.21222	6.73696	113.843	77.6363	182.206
United Republic of Tanzania	2027	2217.05	1770.89	2915.86	16.1032	11.0793	25.3316	7.63257	5.43805	10.8491	220.33	145.063	346.338	1854.74	1495.15	2430.02	13.4716	9.26626	21.0245	6.38526	4.59558	9.04143	200.954	130.147	313.103	1759.4	1408.24	2312.99	12.7792	8.83741	20.0673	6.05704	4.31364	8.60601	202.954	131.563	317.841	1596.08	1274.9	2099.08	11.5929	7.97615	18.2363	5.49479	3.91505	7.81012	158.608	104.426	249.311
United Republic of Tanzania	2028	2564.57	2120.14	3264.21	18.6274	12.9286	29.2938	8.82896	6.48874	12.268	293.259	187.94	460.772	2194.62	1807.83	2808.86	15.9403	10.8949	24.8957	7.55533	5.59683	10.5291	273.47	172.705	427.823	2097.32	1728	2688.99	15.2336	10.3965	23.9188	7.22038	5.31076	10.0459	275.515	174.153	431.671	1846.22	1526.3	2349.82	13.4097	9.30719	21.088	6.35591	4.6714	8.8313	211.099	135.288	331.672
United Republic of Tanzania	2029	2919.27	2478.4	3799.18	21.2037	14.8076	33.3935	10.0501	7.32015	14.1357	377.148	256.08	594.387	2541.53	2166.95	3292.64	18.4601	12.7311	28.9027	8.74965	6.44187	12.251	356.938	240.522	559.721	2442.27	2081.77	3170.81	17.7391	12.2847	27.9064	8.40794	6.14823	11.7977	359.032	242.005	564.675	2101.5	1784.16	2734.79	15.264	10.6596	24.0386	7.23478	5.26982	10.1754	271.475	184.331	427.832
United Republic of Tanzania	2030	3281.16	2750.05	4313.6	23.8322	16.5941	36.9378	11.2959	8.33882	16.0497	472.223	322.454	724.847	2895.67	2432.26	3796.65	21.0322	14.4749	32.3549	9.96882	7.44249	14.1263	451.599	305.97	693.672	2794.35	2345.23	3672.28	20.2963	14.0193	31.3378	9.62001	7.14278	13.6636	453.734	308.113	696.991	2361.96	1979.67	3104.97	17.1557	11.9453	26.5893	8.13144	6.00303	11.5527	339.898	232.095	521.693
Zambia	2021	131.323	83.2962	206.611	0	0	0	0.336186	0.198725	0.577719	0	0	0	94.5522	59.9732	148.76	0	0	0	0.242054	0.143082	0.415957	0	0	0	57.7819	36.6503	90.9086	0	0	0	0.147922	0.0874389	0.254196	0	0	0	94.5522	59.9732	148.76	0	0	0	0.242054	0.143082	0.415957	0	0	0
Zambia	2022	267.653	181.21	393.349	0	0	0	0.685193	0.427656	1.06816	4.07165	1.94405	6.91651	192.71	130.471	283.211	0	0	0	0.493339	0.307912	0.769074	2.93159	1.39971	4.97989	136.153	92.654	201.782	0	0	0	0.348551	0.217884	0.541856	2.36187	1.12773	4.01215	192.71	130.471	283.211	0	0	0	0.493339	0.307912	0.769074	2.93159	1.39971	4.97989
Zambia	2023	407.853	275.16	559.896	0	0	0	1.0441	0.64938	1.54875	12.3711	6.66299	22.5435	293.648	198.113	403.116	0	0	0	0.751739	0.467547	1.11507	8.90684	4.79709	16.2303	235.3	159.278	324.817	0	0	0	0.602367	0.375896	0.910946	8.31572	4.51485	15.2835	293.648	198.113	403.116	0	0	0	0.751739	0.467547	1.11507	8.90684	4.79709	16.2303
Zambia	2024	551.932	441.757	727.138	0	0	0	1.41295	1.01051	2.01484	25.0178	14.5995	42.7884	397.373	318.052	523.51	0	0	0	1.01727	0.727544	1.4506	18.0113	10.5107	30.8047	355.772	291.295	479.384	0	0	0	0.910776	0.630955	1.32308	19.1143	11.2992	33.2457	397.373	318.052	523.51	0	0	0	1.01727	0.727544	1.4506	18.0113	10.5107	30.8047
Zambia	2025	702.576	566.359	926.598	0	0	0	1.79859	1.32792	2.61455	42.4952	24.4557	73.0731	543.409	436.523	720.25	0	0	0	1.39113	1.02878	2.03478	35.2574	20.0565	61.6784	500.94	388.773	668.559	0	0	0	1.28241	0.932413	1.8708	36.4085	20.7797	63.9734	505.817	407.754	667.088	0	0	0	1.29489	0.956046	1.88227	30.5926	17.6062	52.6059
Zambia	2026	858.248	706.078	1118.56	0	0	0	2.19712	1.59065	3.15086	64.656	41.0578	105.242	694.493	564.523	920.087	0	0	0	1.7779	1.28294	2.5772	57.2174	35.8029	93.8809	650.673	527.236	862.881	0	0	0	1.66572	1.21997	2.43577	58.4032	36.6301	95.3357	617.874	508.333	805.265	0	0	0	1.58176	1.14518	2.26828	46.5443	29.5574	75.7586
Zambia	2027	1015.07	837.667	1292.02	0	0	0	2.59859	1.83554	3.74797	91.6522	56.7871	142.763	847.512	693.846	1081.99	0	0	0	2.16963	1.52039	3.13746	84.0056	51.118	130.137	803.242	648.316	1024.1	0	0	0	2.0563	1.45684	2.97522	85.2208	52.5085	131.842	730.755	603.061	930.111	0	0	0	1.87073	1.32146	2.69805	65.9755	40.8787	102.763
Zambia	2028	1174.72	970.932	1501.92	0	0	0	3.00729	2.12755	4.38616	123.519	80.7194	196.293	1003.67	824.137	1276.33	0	0	0	2.56941	1.80589	3.7632	115.682	74.908	183.345	958.989	775.853	1229.18	0	0	0	2.45501	1.742	3.58215	116.94	76.3403	185.113	845.66	698.985	1081.17	0	0	0	2.16489	1.53165	3.15733	88.9108	58.1039	141.287
Zambia	2029	1337.13	1120.77	1667.27	0	0	0	3.42306	2.49971	4.85428	160.342	102.55	244.023	1162.87	965.689	1454.38	0	0	0	2.97694	2.1716	4.21956	152.333	96.5946	230.81	1117.73	942.181	1408.24	0	0	0	2.86138	2.10736	4.03649	153.644	98.0803	232.654	962.549	806.821	1200.14	0	0	0	2.46413	1.79952	3.4942	115.412	73.8154	175.635
Zambia	2030	1502.39	1286.59	1908.28	0	0	0	3.84611	2.86653	5.45624	202.21	131.935	309.68	1325.51	1129.33	1683.23	0	0	0	3.3933	2.53371	4.81196	194.101	125.914	299.48	1279.37	1091.15	1622.01	0	0	0	3.27519	2.45705	4.62496	195.414	127.406	301.222	1081.47	926.161	1373.56	0	0	0	2.76857	2.06354	3.92733	145.542	94.9631	222.898
Zimbabwe	2021	28.9303	16.6968	43.0067	0.00694328	0.00373617	0.012768	0.0740616	0.0429212	0.119574	0.00694328	0.00373617	0.012768	20.8298	12.0217	30.9648	0.00499916	0.00269004	0.00919294	0.0533244	0.0309033	0.086093	0.00499916	0.00269004	0.00919294	12.7293	7.34659	18.9229	0.00305504	0.00164391	0.0056179	0.0325871	0.0188853	0.0526124	0.00305504	0.00164391	0.0056179	20.8298	12.0217	30.9648	0.00499916	0.00269004	0.00919294	0.0533244	0.0309033	0.086093	0.00499916	0.00269004	0.00919294
Zimbabwe	2022	59.3663	37.536	82.6262	0.0142479	0.0079759	0.0228047	0.151978	0.0962152	0.229886	0.0391861	0.0221286	0.0630209	42.7438	27.0259	59.4909	0.0102585	0.00574265	0.0164194	0.109424	0.0692749	0.165518	0.028214	0.0159326	0.0453751	30.1714	19.1118	41.9925	0.00724114	0.00406101	0.0113716	0.0772389	0.0483273	0.117002	0.0217062	0.0122699	0.0352786	42.7438	27.0259	59.4909	0.0102585	0.00574265	0.0164194	0.109424	0.0692749	0.165518	0.028214	0.0159326	0.0453751
Zimbabwe	2023	90.0925	64.1664	119.666	0.0216222	0.0129325	0.0341842	0.230637	0.153634	0.350239	0.0977373	0.0527012	0.167014	64.866	46.1994	86.1584	0.0155678	0.00931132	0.0246124	0.166057	0.110616	0.252168	0.0703697	0.0379442	0.120248	52.001	37.5321	68.9508	0.0124803	0.00724025	0.0202179	0.133123	0.0880978	0.203145	0.0636108	0.0337567	0.10989	64.866	46.1994	86.1584	0.0155678	0.00931132	0.0246124	0.166057	0.110616	0.252168	0.0703697	0.0379442	0.120248
Zimbabwe	2024	121.211	88.3616	153.363	0.0290907	0.017594	0.0473606	0.3103	0.203907	0.454001	0.18287	0.105935	0.317673	87.2701	63.6194	110.418	0.0209448	0.0126674	0.0340988	0.223412	0.146811	0.326872	0.131661	0.0762704	0.228716	78.304	56.5291	99.3788	0.018793	0.0111842	0.0313734	0.200458	0.129773	0.291974	0.13628	0.0788937	0.238508	87.2701	63.6194	110.418	0.0209448	0.0126674	0.0340988	0.223412	0.146811	0.326872	0.131661	0.0762704	0.228716
Zimbabwe	2025	150.338	111.685	188.568	0.0360812	0.0228015	0.0595301	0.384866	0.259676	0.553621	0.286194	0.177	0.498133	115.678	86.4067	145.639	0.0277628	0.017515	0.0459775	0.296137	0.196414	0.423958	0.233487	0.145662	0.40655	106.763	79.0122	137.115	0.0256231	0.016107	0.0432866	0.273313	0.182686	0.387731	0.238615	0.146974	0.417262	108.24	80.411	135.764	0.0259776	0.0164167	0.0428601	0.277095	0.186962	0.39859	0.206049	0.127435	0.358635
Zimbabwe	2026	180.217	137.793	227.916	0.0432522	0.0273928	0.0719519	0.461356	0.310655	0.675755	0.414379	0.249807	0.72175	145.014	112.056	184.347	0.0348035	0.0220282	0.0581976	0.371237	0.246405	0.543935	0.36105	0.218443	0.6291	135.842	103.875	175.567	0.032602	0.0202654	0.0554256	0.347755	0.232228	0.508483	0.366176	0.220108	0.639845	129.751	99.2077	164.091	0.0311402	0.0197219	0.0518026	0.332162	0.223664	0.486513	0.298332	0.17985	0.519618
Zimbabwe	2027	209.533	168.101	265.915	0.050288	0.0325293	0.0839481	0.536406	0.369946	0.762583	0.5681	0.375637	0.982825	174.02	139.335	221.902	0.0417647	0.0273764	0.0700533	0.445491	0.30518	0.629608	0.514017	0.340227	0.888857	164.93	131.29	213.195	0.0395832	0.0258732	0.0673048	0.422221	0.29122	0.594472	0.519201	0.342197	0.899706	150.855	121.026	191.446	0.0362053	0.0234196	0.0604385	0.38619	0.266349	0.549019	0.408995	0.270433	0.707561
Zimbabwe	2028	239.001	192.893	299.166	0.0573603	0.0375469	0.0944451	0.611843	0.418467	0.84859	0.747011	0.502992	1.24673	203.235	166.106	254.807	0.0487764	0.0323608	0.0804413	0.520282	0.353176	0.714741	0.692303	0.468042	1.15162	194.221	157.65	246.212	0.0466131	0.030867	0.0777278	0.497206	0.339347	0.679897	0.697705	0.47381	1.16285	172.069	138.874	215.382	0.0412965	0.0270317	0.067995	0.440496	0.301281	0.61093	0.53779	0.362113	0.897538
Zimbabwe	2029	268.661	215.189	331.627	0.0644788	0.041746	0.104693	0.687773	0.48138	0.948378	0.951257	0.617182	1.53973	232.685	186.602	287.017	0.0558445	0.0365226	0.0906099	0.595674	0.415614	0.81391	0.896077	0.579261	1.44381	223.705	180.871	278.491	0.0536891	0.0350329	0.0879183	0.572684	0.401898	0.77943	0.901783	0.585279	1.45559	193.42	154.927	238.749	0.0464208	0.0300545	0.0753718	0.495156	0.346571	0.68276	0.684819	0.44433	1.10845
Zimbabwe	2030	298.536	242.174	365.196	0.0716487	0.0471828	0.115291	0.764253	0.534452	1.07186	1.18087	0.772428	1.87828	262.515	213.99	320.558	0.0630035	0.0417483	0.101198	0.672037	0.46868	0.937002	1.12592	0.734292	1.78279	253.347	204.926	311.811	0.0608032	0.0399799	0.098437	0.648568	0.4546	0.901567	1.13136	0.738172	1.79411	214.925	174.35	262.912	0.0515821	0.0339681	0.0830002	0.550209	0.384777	0.771646	0.850102	0.556077	1.35214

## Sheet: Code Book
Variable Name	Definition
country	Country
year	Year
I_VE0	Baseline cases
I_VE0_min	Baseline cases (min)
I_VE0_max	Baseline cases (max)
Ires_VE0	Baseline resistant cases
Ires_VE0_min	Baseline resistant cases (min)
Ires_VE0_max	Baseline resistant cases (max)
D_VE0	Baseline deaths
D_VE0_min	Baseline deaths (min)
D_VE0_max	Baseline deaths (max)
Ires2_VE0	Baseline resistant cases with treatment failure rates (TFRs) increasing to 80% by 2030
Ires2_VE0_min	Baseline resistant cases with treatment failure rates (TFRs) increasing to 80% by 2030 (min)
Ires2_VE0_max	Baseline resistant cases with treatment failure rates (TFRs) increasing to 80% by 2030 (max)
I_VE1	Scenario 1 cases
I_VE1_min	Scenario 1 cases (min)
I_VE1_max	Scenario 1 cases (max)
Ires_VE1	Scenario 1 resistant cases
Ires_VE1_min	Scenario 1 resistant cases (min)
Ires_VE1_max	Scenario 1 resistant cases (max)
D_VE1	Scenario 1 deaths
D_VE1_min	Scenario 1 deaths (min)
D_VE1_max	Scenario 1 deaths (max)
Ires2_VE1	Scenario 1 resistant cases with TFRs increasing to 80% by 2030
Ires2_VE1_min	Scenario 1 resistant cases with TFRs increasing to 80% by 2030 (min)
Ires2_VE1_max	Scenario 1 resistant cases with TFRs increasing to 80% by 2030 (max)
I_VE2	Scenario 2 cases
I_VE2_min	Scenario 2 cases (min)
I_VE2_max	Scenario 2 cases (max)
Ires_VE2	Scenario 2 resistant cases
Ires_VE2_min	Scenario 2 resistant cases (min)
Ires_VE2_max	Scenario 2 resistant cases (max)
D_VE2	Scenario 2 deaths
D_VE2_min	Scenario 2 deaths (min)
D_VE2_max	Scenario 2 deaths (max)
Ires2_VE2	Scenario 2 resistant cases with TFRs increasing to 80% by 2030
Ires2_VE2_min	Scenario 2 resistant cases with TFRs increasing to 80% by 2030 (min)
Ires2_VE2_max	Scenario 2 resistant cases with TFRs increasing to 80% by 2030 (max)
I_VE3	Scenario 3 cases
I_VE3_min	Scenario 3 cases (min)
I_VE3_max	Scenario 3 cases (max)
Ires_VE3	Scenario 3 resistant cases
Ires_VE3_min	Scenario 3 resistant cases (min)
Ires_VE3_max	Scenario 3 resistant cases (max)
D_VE3	Scenario 3 deaths
D_VE3_min	Scenario 3 deaths (min)
D_VE3_max	Scenario 3 deaths (max)
Ires2_VE3	Scenario 3 resistant cases with TFRs increasing to 80% by 2030
Ires2_VE3_min	Scenario 3 resistant cases with TFRs increasing to 80% by 2030 (min)
Ires2_VE3_max	Scenario 3 resistant cases with TFRs increasing to 80% by 2030 (max)

## Sheet: Scenarios
Scenario	Description
Baseline (No Vaccine)	VE remains constant at 40% for four years and drops to 0% in year five
VE1	VE begins at 80% and drops 20 percentage points each year until reaching 0% in year five
VE2	VE remains constant at 40% for the entire study period
VE3	VE remains constant at 40% for the entire study period
VE1 with Increasing TFR	The same VE as Scenario 1 with TFRs to ACTs increasing linearly to 80% by 2030
